# Supplementary material for: Photolysis-driven bond activation by thorium and uranium tetraosmate polyhydride complexes
Source: Royal Society of Chemistry journal article supplement (doi:10.1039/d4sc02380c), 2024-01-01
Supplement: d4sc02380c1.pdf [file d4sc02380c1.pdf]

## Photolysis-Driven Bond Activation by Thorium and Uranium Tetraosmate Polyhydride Complexes

Christopher Z. Ye,<sup>a</sup> Iker Del Rosal,<sup>b</sup> Sheridan N. Kelly,<sup>a</sup> I. Joseph Brackbill,<sup>a</sup> Laurent Maron,<sup>b</sup>  
Clément Camp,<sup>\*c</sup> and John Arnold<sup>\*a</sup>

<sup>a</sup> Department of Chemistry, University of California, Berkeley, California 94720, United States;  
Chemical Sciences Division, Lawrence Berkeley National Laboratory, Berkeley, California  
94720, United States.

<sup>b</sup> LPCNO, Université de Toulouse, INSA Toulouse, 135 Avenue de Rangueil, Toulouse 31077,  
France.

<sup>c</sup> Laboratory of Catalysis, Polymerization, Processes and Materials, CP2M UMR 5128, CNRS,  
Université Claude Bernard Lyon 1, CPE-Lyon, Institut de Chimie de Lyon, 43 Bd du 11  
Novembre 1918, 69616 Villeurbanne, France.

## **Supporting Information**

|                         |         |
|-------------------------|---------|
| Experimental Procedures | S3-S5   |
| UV-Vis Spectroscopy     | S6      |
| IR Spectroscopy         | S7-S8   |
| NMR Spectroscopy        | S9-S33  |
| X-ray Crystallography   | S34-S37 |
| Computational Section   | S38-S58 |
| References              | S59     |

## Experimental Procedures

*General considerations:* Unless otherwise noted, all reactions were performed using standard Schlenk line techniques under an atmosphere of nitrogen, or in an MBraun inert atmosphere glove box under an atmosphere of nitrogen. Glassware and Celite® were stored in an oven at ca. 150 °C for at least 3 h prior to use. Molecular sieves (4 Å) were activated by heating to 200 °C overnight under vacuum prior to storage in a glovebox. NMR spectra were recorded on Bruker AV-600, AV-700, and AV-500 spectrometers. <sup>1</sup>H chemical shifts are given relative to residual solvent peaks and are recorded in units of parts per million (ppm). FT-IR samples were prepared as Nujol mulls pressed between KBr plates, with data collected with a Nicolet iS10 FT-IR spectrometer. Melting points were determined using sealed capillaries prepared under nitrogen on an OptiMelt automated melting point system. Elemental analyses were determined at the Microanalytical Facility at the College of Chemistry, University of California, Berkeley.

*Materials:* Tetrahydrofuran (THF), toluene, benzene, *n*-hexane, and *n*-pentane were purified by passage through columns of activated alumina and degassed by sparging with dinitrogen. Deuterated solvents were degassed with three freeze-pump-thaw cycles and stored over molecular sieves. Benzylpotassium,<sup>1</sup> Cp\*OsH<sub>5</sub>,<sup>2,3</sup> UCl<sub>4</sub>,<sup>4</sup> and ThCl<sub>4</sub>(DME)<sub>2</sub><sup>5</sup> were synthesized according to literature procedures. Mesitylene and fluorobenzene were purchased from commercial sources and stored on molecular sieves. All other chemicals were purchased from commercial sources and used as received.

### *In-situ* generation of K[Cp\*OsH<sub>5</sub>] (1):

Cp\*OsH<sub>5</sub> (5.0 mg, 0.015 mmol, 1.0 equiv.) and benzyl potassium (2.0 mg, 0.015 mmol, 1.0 equiv.) were dissolved in 0.4 mL d<sub>8</sub>-THF each, then added together in a J. Young NMR tube and sealed. The colorless and orange solutions immediately become very pale yellow (nearly colorless). Analysis of the solution revealed the quantitative formation of **1** along with toluene. <sup>1</sup>H NMR (500 MHz, THF-*d*<sub>8</sub>): δ 2.16 (s, 15H, CH<sub>3</sub>Cp\*), -17.15 (s, 4H, Os-H).

### Synthesis of Th{(μ-H<sub>4</sub>)OsCp\*}<sub>4</sub> (2-Th):

Cp\*OsH<sub>5</sub> (160.4 mg, 0.485 mmol, 4.0 equiv.) and benzyl potassium (63.1 mg, 0.485 mmol, 4.0 equiv.) were added to a 20 mL scintillation vial with THF (4 mL) to generate a solution of K[Cp\*OsH<sub>4</sub>]. ThCl<sub>4</sub>(DME)<sub>2</sub> (67.2 mg, 0.121 mmol, 1.0 equiv.) was dissolved in THF (4 mL) and added to the K[Cp\*OsH<sub>4</sub>] solution. The colorless solution immediately turned pale yellow and opaque as KCl precipitated out of solution. After stirring at room temperature for 2 h, the solvent was removed *in vacuo*. The crude solid was then triturated with *n*-hexane and the product was extracted with *n*-hexane (8 mL), filtered through Celite, and concentrated (2 mL). This solution was cooled to -40 °C, affording cubic colorless crystals (104.4 mg). A second crop of crystals were grown after concentration of the mother liquor to 1 mL (124.3 mg total, 66% total yield). Mp ca. 190 °C (slow decomp. starting from 110 °C); <sup>1</sup>H NMR (600 MHz, C<sub>6</sub>D<sub>6</sub>): δ 2.13 (s, 60H, CH<sub>3</sub>Cp\*), -11.01 (s, 16H, Th-H-Os); <sup>13</sup>C NMR (600 MHz, C<sub>6</sub>D<sub>6</sub>): δ 92.5 (C<sub>5</sub>(CH<sub>3</sub>)<sub>5</sub>), 12.5

(C<sub>5</sub>(CH<sub>3</sub>)<sub>5</sub>); IR (Nujol mull on KBr): 1993 (s), 1073 (w), 1034 (m), 863 (m), 560 (m); Anal. Calcd (%) for ThOs<sub>4</sub>C<sub>40</sub>H<sub>76</sub>: C, 31.00; H, 4.94. Found: C, 31.16; H, 4.93.

#### Synthesis of U{(μ-H<sub>4</sub>)OsCp\*}<sub>4</sub> (2-U):

Cp\*OsH<sub>5</sub> (146.8 mg, 0.444 mmol, 4.0 equiv.) and benzyl potassium (59.8 mg, 0.459 mmol, 4.1 equiv.) were added to a 20 mL scintillation vial with THF (4 mL) to generate a solution of K[Cp\*OsH<sub>4</sub>]. UCl<sub>4</sub> (42.1 mg, 0.111 mmol, 1.0 equiv.) was dissolved in THF (4 mL) and added to the K[Cp\*OsH<sub>4</sub>] solution. The colorless solution immediately turned bright yellow and opaque as KCl precipitated out of solution. After stirring at room temperature for 2 h, the solvent was removed *in vacuo*. The crude solid was then triturated with *n*-hexane and the product was extracted with *n*-hexane (8 mL), filtered through Celite, and concentrated (2 mL). This solution was cooled to -40 °C, affording cubic yellow crystals (87.6 mg). A second crop of crystals were grown after concentration of the mother liquor to 1 mL (110.7 mg total, 64% total yield). Mp ca. 240 °C (decomp.); <sup>1</sup>H NMR (600 MHz, C<sub>6</sub>D<sub>6</sub>): δ 89.8 (s, 16H, U-H-Os), 3.65 (s, 60H, CH<sub>3</sub>Cp\*); <sup>13</sup>C NMR (600 MHz, C<sub>6</sub>D<sub>6</sub>): δ 114.2 (C<sub>5</sub>(CH<sub>3</sub>)<sub>5</sub>), 12.4 (C<sub>5</sub>(CH<sub>3</sub>)<sub>5</sub>); IR (Nujol mull on KBr): 2091 (w), 1990 (s), 1072 (w), 1034 (m), 862 (m), 559 (m); Anal. Calcd (%) for UOs<sub>4</sub>C<sub>40</sub>H<sub>76</sub>: C, 30.88; H, 4.92. Found: C, 31.21; H, 4.75.

#### Synthesis of 3-U via photolysis of 2-U:

2-U (38.5 mg, 0.025 mmol) was dissolved in 3 mL benzene and transferred to a Teflon-tap sealed quartz cuvette. The yellow solution was photolyzed for 6 hours, yielding a dark brown solution. After removing the solvent *in vacuo*, the crude solid was extracted with *n*-hexane, filtered, and concentrated to 0.5 mL. This solution was allowed to stand at RT overnight, yielding dark brown crystals (16.7 mg, 43% yield). Mp. 235 °C (slow decomp. starting from 208 °C); <sup>1</sup>H NMR (600 MHz, C<sub>6</sub>D<sub>6</sub>): δ 55.46 (s, 8H, Cp\*Os<sub>a</sub>(μ-H)<sub>4</sub>), 9.84 (s, 6H, [(CH<sub>2</sub>)Me<sub>4</sub>C<sub>5</sub>]Os<sub>c</sub>), 1.43 (s, 30H, Cp\*Os<sub>a</sub>), -2.44 (s, 15H, Cp\*Os<sub>b</sub>), -4.82 (s, 6H, [(CH<sub>2</sub>)Me<sub>4</sub>C<sub>5</sub>]Os<sub>c</sub>), -89.11 (s, 2H, [(CH<sub>2</sub>)Me<sub>4</sub>C<sub>5</sub>]Os<sub>c</sub>); <sup>13</sup>C NMR (600 MHz, C<sub>6</sub>D<sub>6</sub>): δ 106.43, 74.34 (CH<sub>2</sub>), 29.97, 12.75, 7.52, -4.46; IR (Nujol mull on KBr): 1990 (s), 1152 (w), 1072 (w), 1032 (m), 947 (w), 890 (w), 625 (w), 585 (w); Anal. Calcd (%) for UOs<sub>4</sub>C<sub>40</sub>H<sub>73</sub>•C<sub>6</sub>H<sub>14</sub>: C, 33.71; H, 5.35. Found: Sample 1: C, 33.81; H, 4.97. Sample 2: C, 33.78; H, 5.04.

#### Synthesis of 3-Th and 4-Th via photolysis of 2-Th:

Complex 2-Th (29.4 mg, 0.019 mmol) was dissolved in 3 mL benzene and transferred to a Teflon-tap sealed quartz cuvette. The colorless solution was photolyzed for 6 hours, yielding an orange solution. After removing the solvent *in vacuo*, the crude solid was extracted with *n*-hexane and minimal benzene, filtered, and concentrated to 0.5 mL. This solution was allowed to stand at RT overnight, yielding orange crystals composed of 22% 3-Th and 78% 4-Th (mol/mol %) by <sup>1</sup>H NMR (20.4 mg, 66% total yield by Th). Both products consistently co-crystallize in similar ratios across multiple syntheses, and show no evident differences in color. Mp. 215 °C (slow decomp. starting from 182 °C); IR (Nujol mull on KBr): 2009 (s), 1566 (w), 1549 (w), 1152 (w), 1071 (w), 1033 (m), 901 (w), 710 (w), 585 (w); Anal. Calcd (%) for 0.22 ThOs<sub>4</sub>C<sub>40</sub>H<sub>70</sub>•C<sub>6</sub>H<sub>14</sub>/0.78 ThOs<sub>4</sub>C<sub>46</sub>H<sub>74</sub>: C, 34.06; H, 4.73. Found: C, 34.29; H, 4.85.

Isolation of **3-Th**: A sample of **2-Th** (9.6 mg, 0.006 mmol) was dissolved in 0.75 mL benzene and photolyzed in a sealed J.Young NMR tube for 66.5 hours, then dried *in vacuo*, extracted with *n*-hexane, filtered, and concentrated to 0.5 mL. This solution was allowed to stand at  $-40\text{ }^{\circ}\text{C}$  overnight, yielding orange crystals of **3-Th** (1.7 mg, 17% yield). The  $^1\text{H}$  NMR and  $^{13}\text{C}$  NMR spectra can be found in Figures S16 and S17.

**3-Th**:  $^1\text{H}$  NMR (700 MHz,  $\text{C}_6\text{D}_6$ ):  $\delta$  7.98 (d, 1H,  $\text{H}_d$ ), 7.76 (d, 1H,  $\text{H}_e$ ), 7.20 (td, 1H,  $\text{H}_e$ ), 7.07 (m, 2H,  $\text{H}_f/\text{H}_f'$ ), 2.87 (s, 3H,  $\text{Cp}^*_{\text{activ}}$ ), 2.79 (s, 3H,  $\text{Cp}^*_{\text{activ}}$ ), 2.15 (s, 15H,  $\text{Cp}^*$ ), 2.13 (s, 15H,  $\text{Cp}^*$ ), 1.87 (s, 15H,  $\text{Cp}^*$ ), 1.82 (s, 3H,  $\text{Cp}^*_{\text{activ}}$ ), 1.77 (s, 3H,  $\text{Cp}^*_{\text{activ}}$ ), 1.37 (d, 1H,  $\text{H}_a$ ), 1.08 (d, 1H,  $\text{H}_b$ ),  $-8.16$  (t, 1H,  $\text{H}_h$ ),  $-9.80$  (s, 3H,  $\text{H}_{\text{hydride}}$ ),  $-10.54$  (d, 1H,  $\text{H}_g$ ),  $-10.84$  (s, 1H,  $\text{H}_i$ ),  $-11.59$  (s, 4H,  $\text{Cp}^*\text{Os}(\mu\text{-H})_4\text{Th}$ );  $^{13}\text{C}$  NMR (600 MHz,  $\text{C}_6\text{D}_6$ ):  $\delta$  155.0 ( $\text{C}_d$ ), 150.9 ( $\text{C}_c$ ), 136.0 ( $\text{C}_e\text{-C}_d$ ), 130.1 ( $\text{C}_e$ ), 127.0 ( $\text{C}_f, \text{C}_f'$ ), 100.4, 93.9, 92.0, 80.3, 79.7, 78.8, 77.4, 77.4, 61.0 ( $\text{CH}_a\text{H}_b$ ), 14.0, 13.7, 12.6, 11.8, 11.4, 11.1, 11.1.

Isolation of **4-Th**: A single sample containing 16.1 mg **3-Th** and 13.7 mg **4-Th** was recrystallized from a 1:1 *n*-hexane/benzene solution at  $-40\text{ }^{\circ}\text{C}$ , yielding 8.2 mg of crystals containing 88% **4-Th** (mol%). The  $^1\text{H}$  and  $^{13}\text{C}$  NMR spectra can be found in Figures S18 and S19.

**4-Th**:  $^1\text{H}$  NMR (600 MHz,  $\text{C}_6\text{D}_6$ )  $\delta$  2.89 (s, 6H,  $\text{Cp}^*_{\text{activ}}$ ), 2.16 (s, 15H,  $\text{Cp}^*\text{Os}(\mu\text{-H})_3\text{OsCp}^*_{\text{activ}}$ ), 2.13 (s, 30H,  $[\text{Cp}^*\text{Os}(\mu\text{-H})_4]_2\text{Th}$ ), 1.77 (s, 6H,  $\text{Cp}^*_{\text{activ}}$ ), 1.34 (s, 2H,  $\text{CH}_2\text{-Th}$ ),  $-9.76$  (s, 3H,  $\text{Cp}^*\text{Os}(\mu\text{-H})_3\text{OsCp}^*_{\text{activ}}$ ),  $-11.07$  (s, 8H,  $[\text{Cp}^*\text{Os}(\mu\text{-H})_4]_2\text{Th}$ );  $^{13}\text{C}$  NMR (600 MHz,  $\text{C}_6\text{D}_6$ ):  $\delta$  103.6 ( $\text{Cp}^*_{\text{activ}}$ , ring C), 92.9 ( $[\text{C}_5\text{Me}_5\text{Os}(\mu\text{-H})_4]_2\text{Th}$ ), 80.9 ( $\text{C}_5\text{Me}_5\text{Os}(\mu\text{-H})_3\text{OsCp}^*_{\text{activ}}$ ), 79.7 ( $\text{Cp}^*_{\text{activ}}$ , ring C), 77.2 ( $\text{Cp}^*_{\text{activ}}$ , ring C), 65.6 ( $\text{Th-CH}_2$ ), 13.8 ( $\text{Cp}^*_{\text{activ}}$ ,  $\text{CH}_3$ ), 12.4 ( $[\text{C}_5\text{Me}_5\text{Os}(\mu\text{-H})_4]_2\text{Th}$ ), 11.7 ( $\text{C}_5\text{Me}_5\text{Os}(\mu\text{-H})_3\text{OsCp}^*_{\text{activ}}$ ), 10.9 ( $\text{Cp}^*_{\text{activ}}$ ,  $\text{CH}_3$ ).

## UV-Vis Spectra

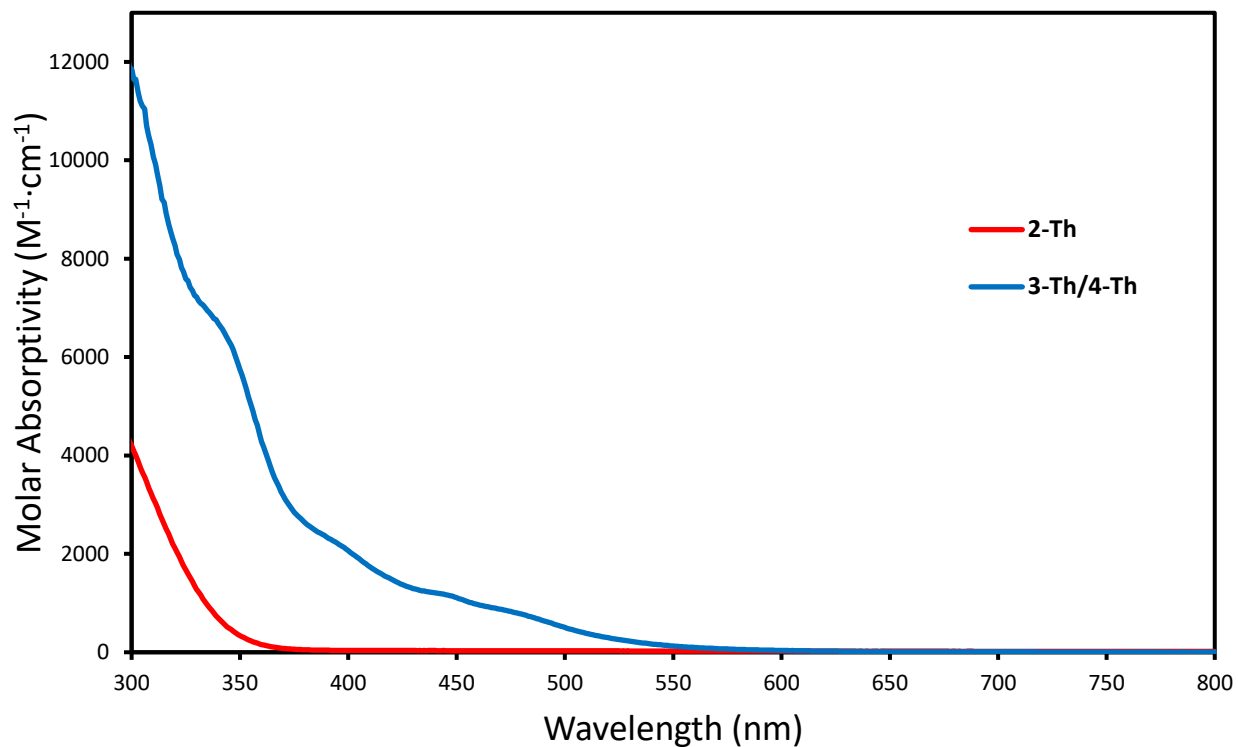

**Figure S1.** UV-vis spectra of colorless **2-Th** and crystallized 22:78 **3-Th/4-Th** in benzene.

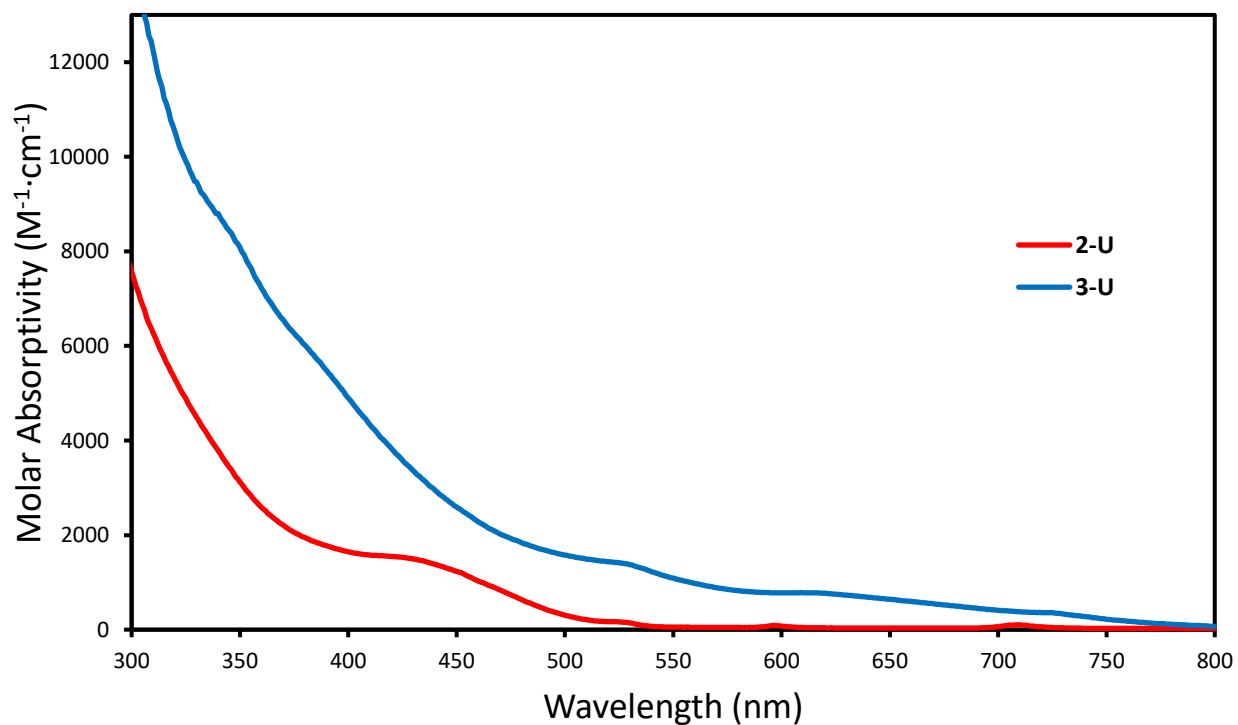

**Figure S2.** UV-vis spectra of yellow **2-U** and dark brown photolysis product **3-U** in benzene.

## IR Spectra

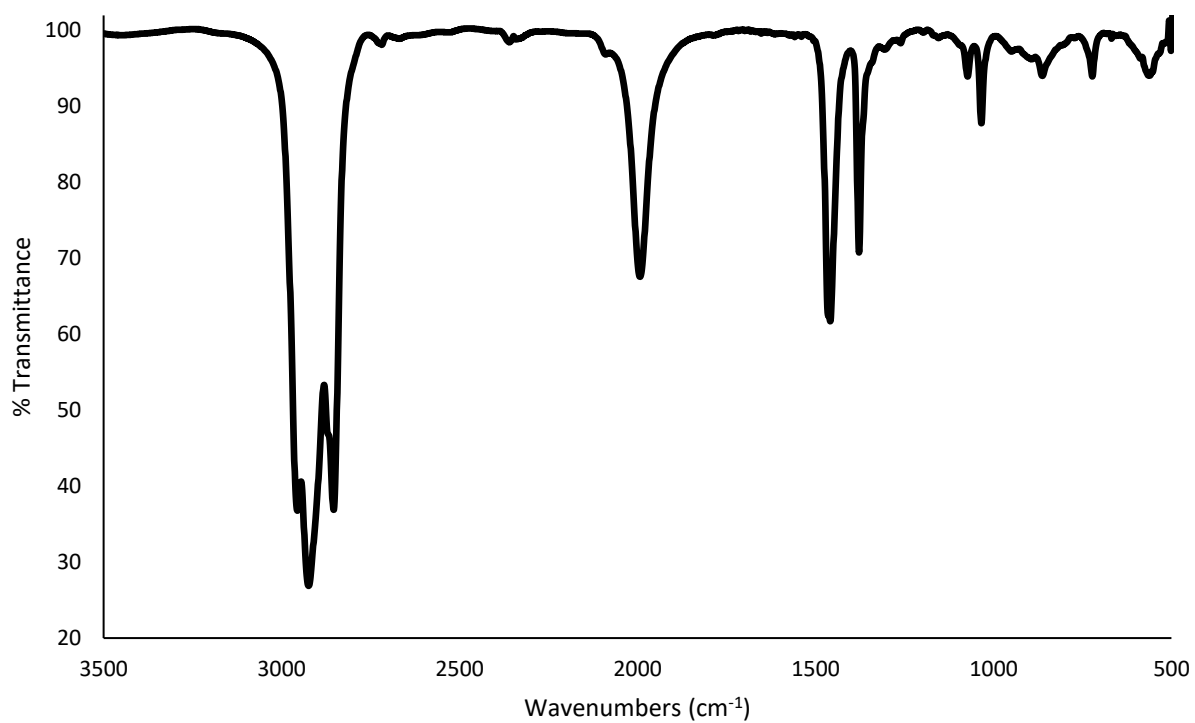

**Figure S3.** IR spectrum of **2-Th** (Nujol mull).

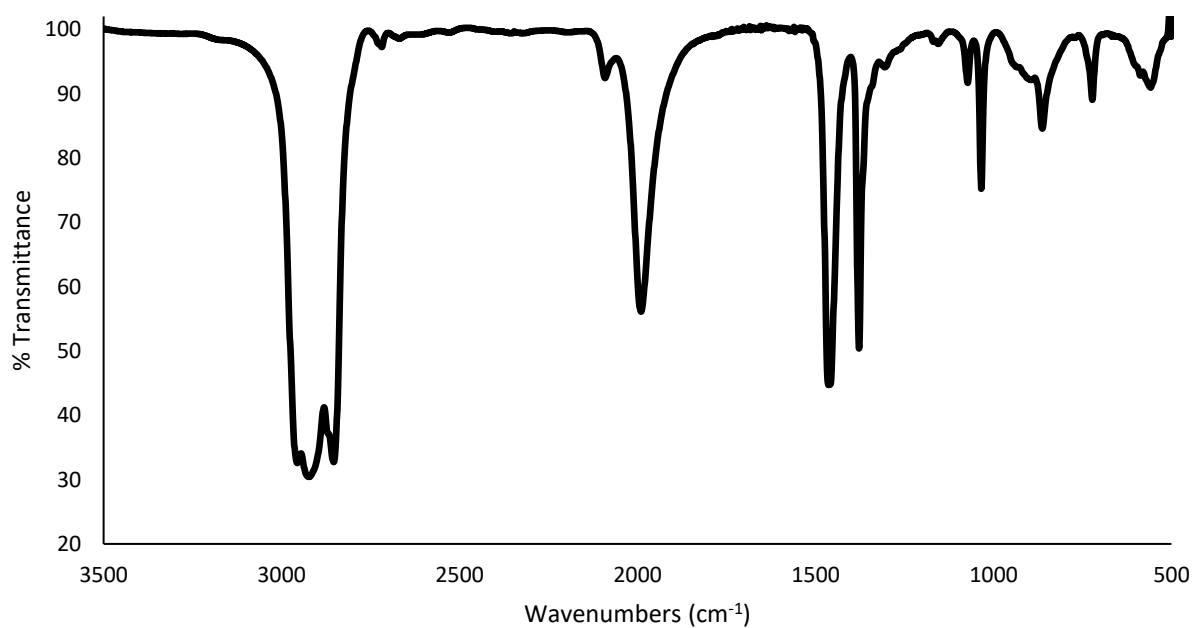

**Figure S4.** IR spectrum of **2-U** (Nujol mull).

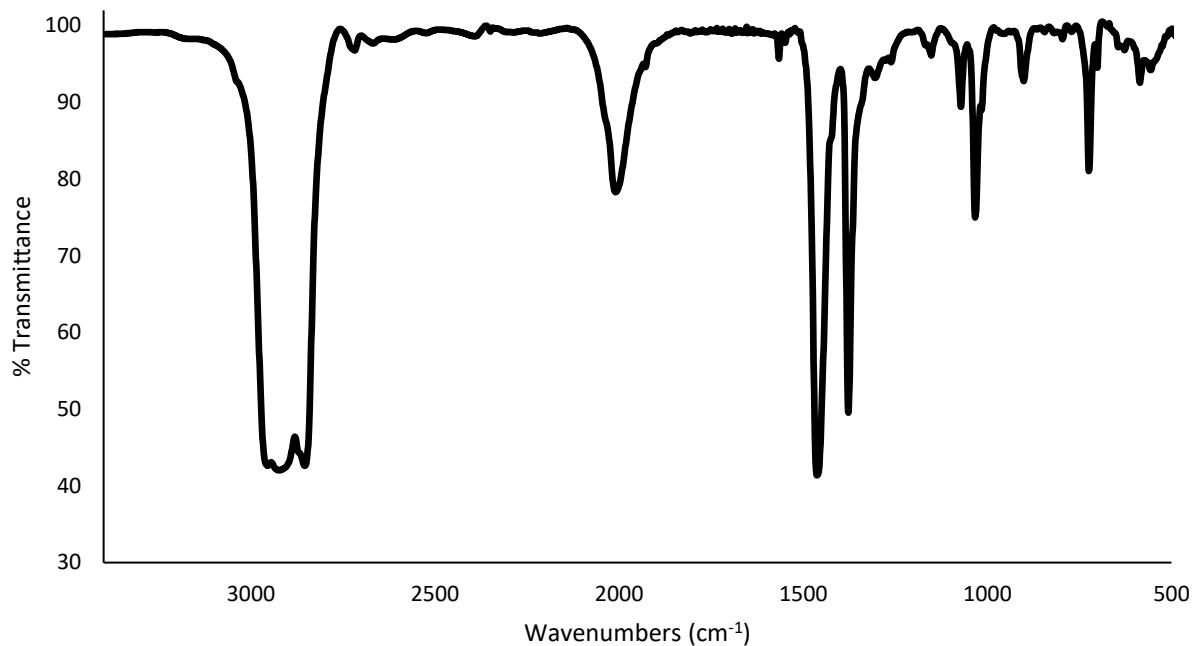

**Figure S5.** IR spectrum of crystallized 22:78 **3-Th/4-Th** (Nujol mull).

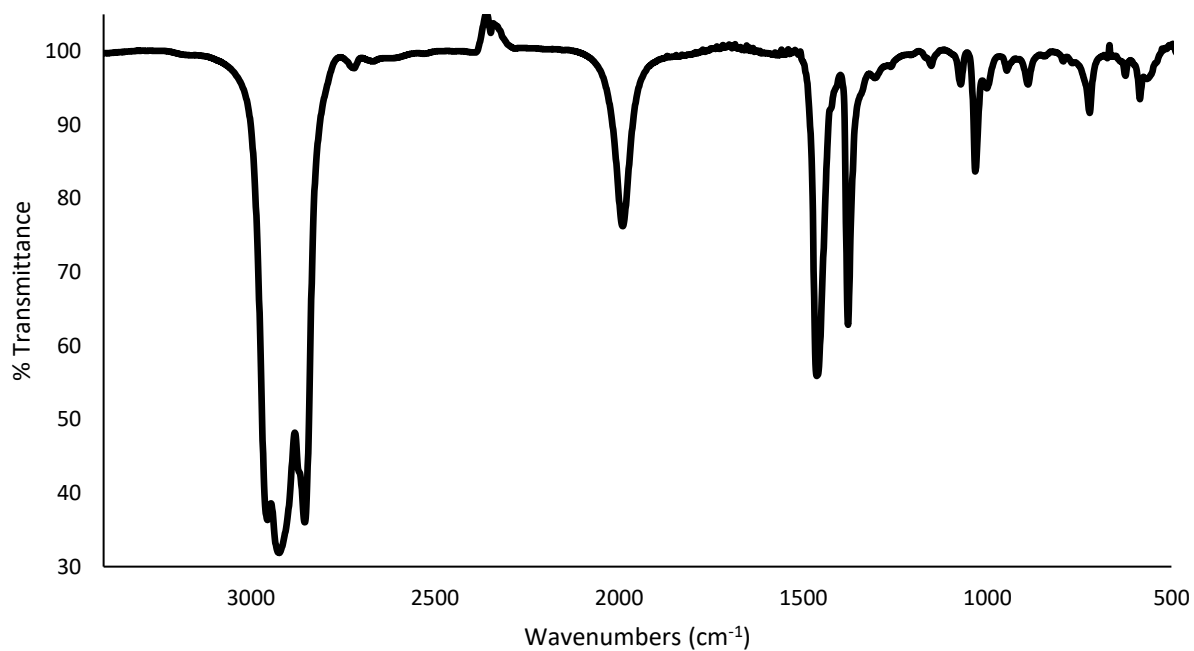

**Figure S6.** IR spectrum of **3-U** (Nujol mull) .



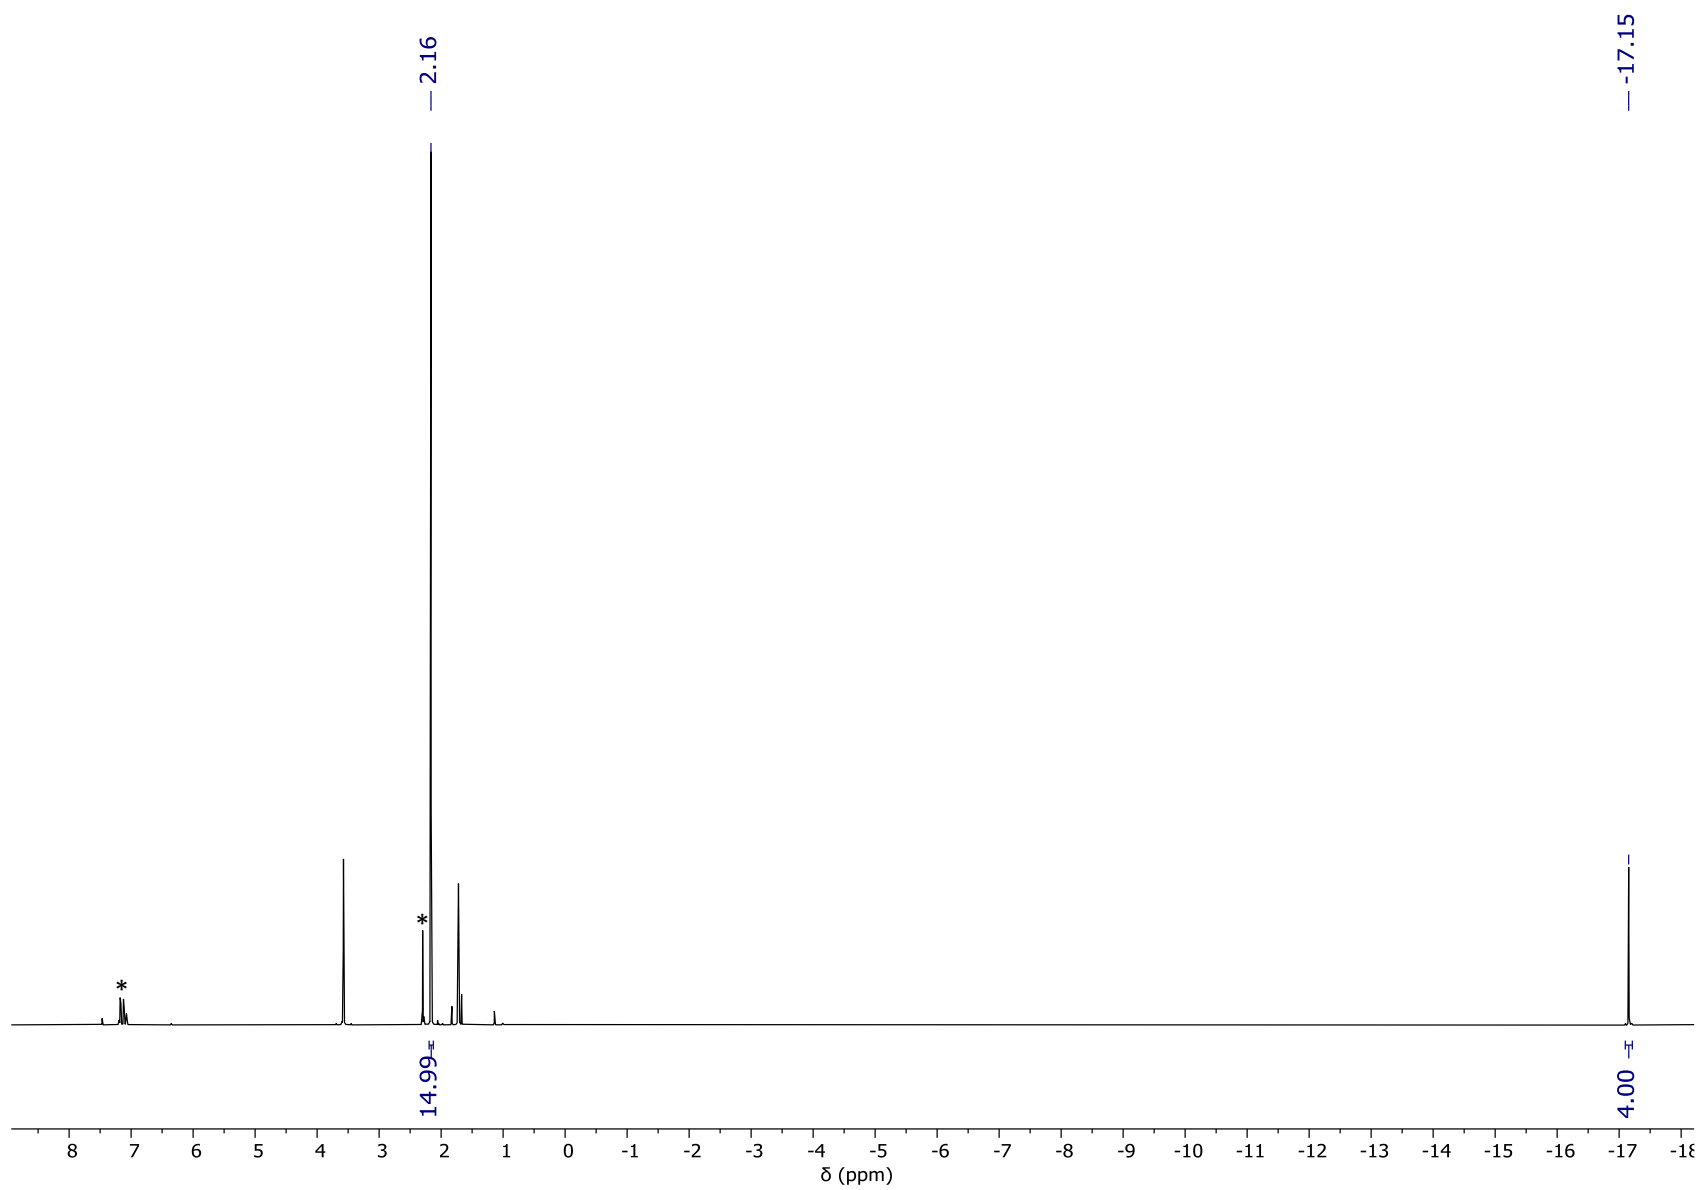

**Figure S7.**  $^1\text{H}$  NMR spectrum of *in-situ* generated **1** at 298 K in  $\text{THF-}d_8$ , \* = toluene.

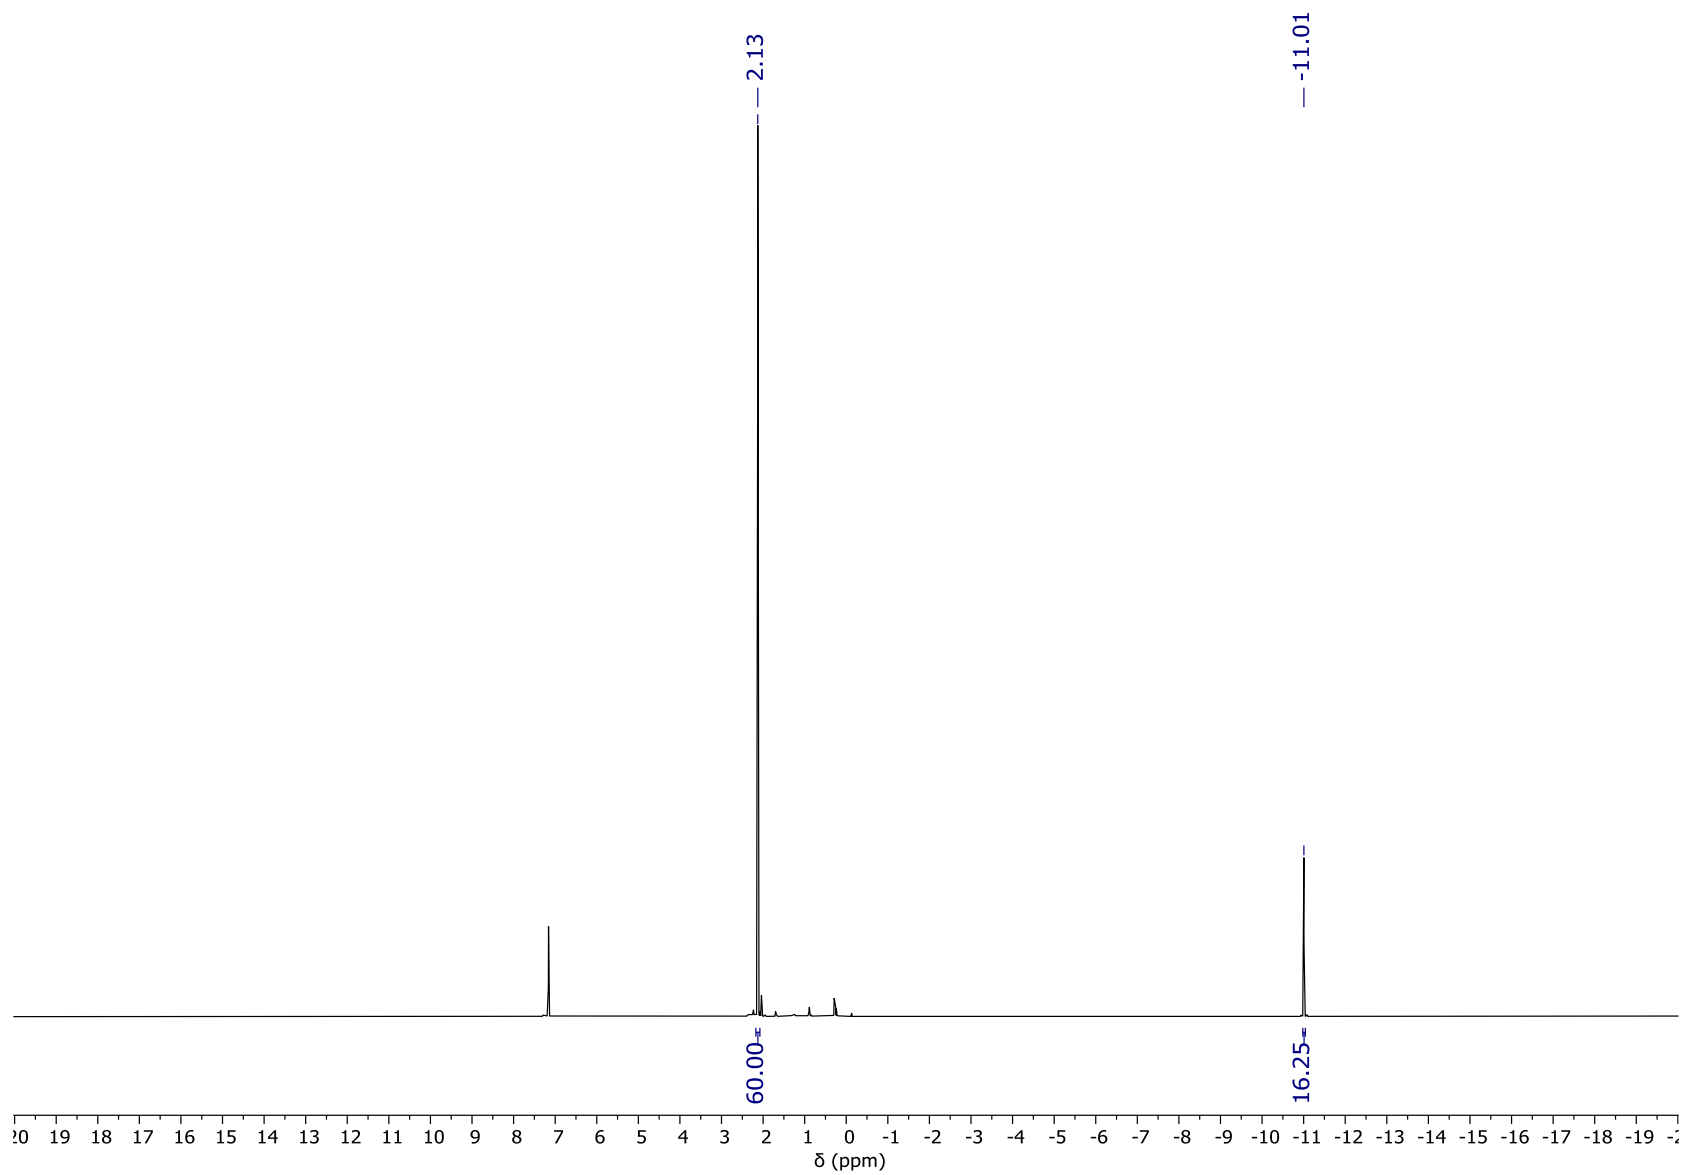

**Figure S8.**  $^1\text{H}$  NMR spectrum of **2-Th** at 298 K in  $\text{C}_6\text{D}_6$ .

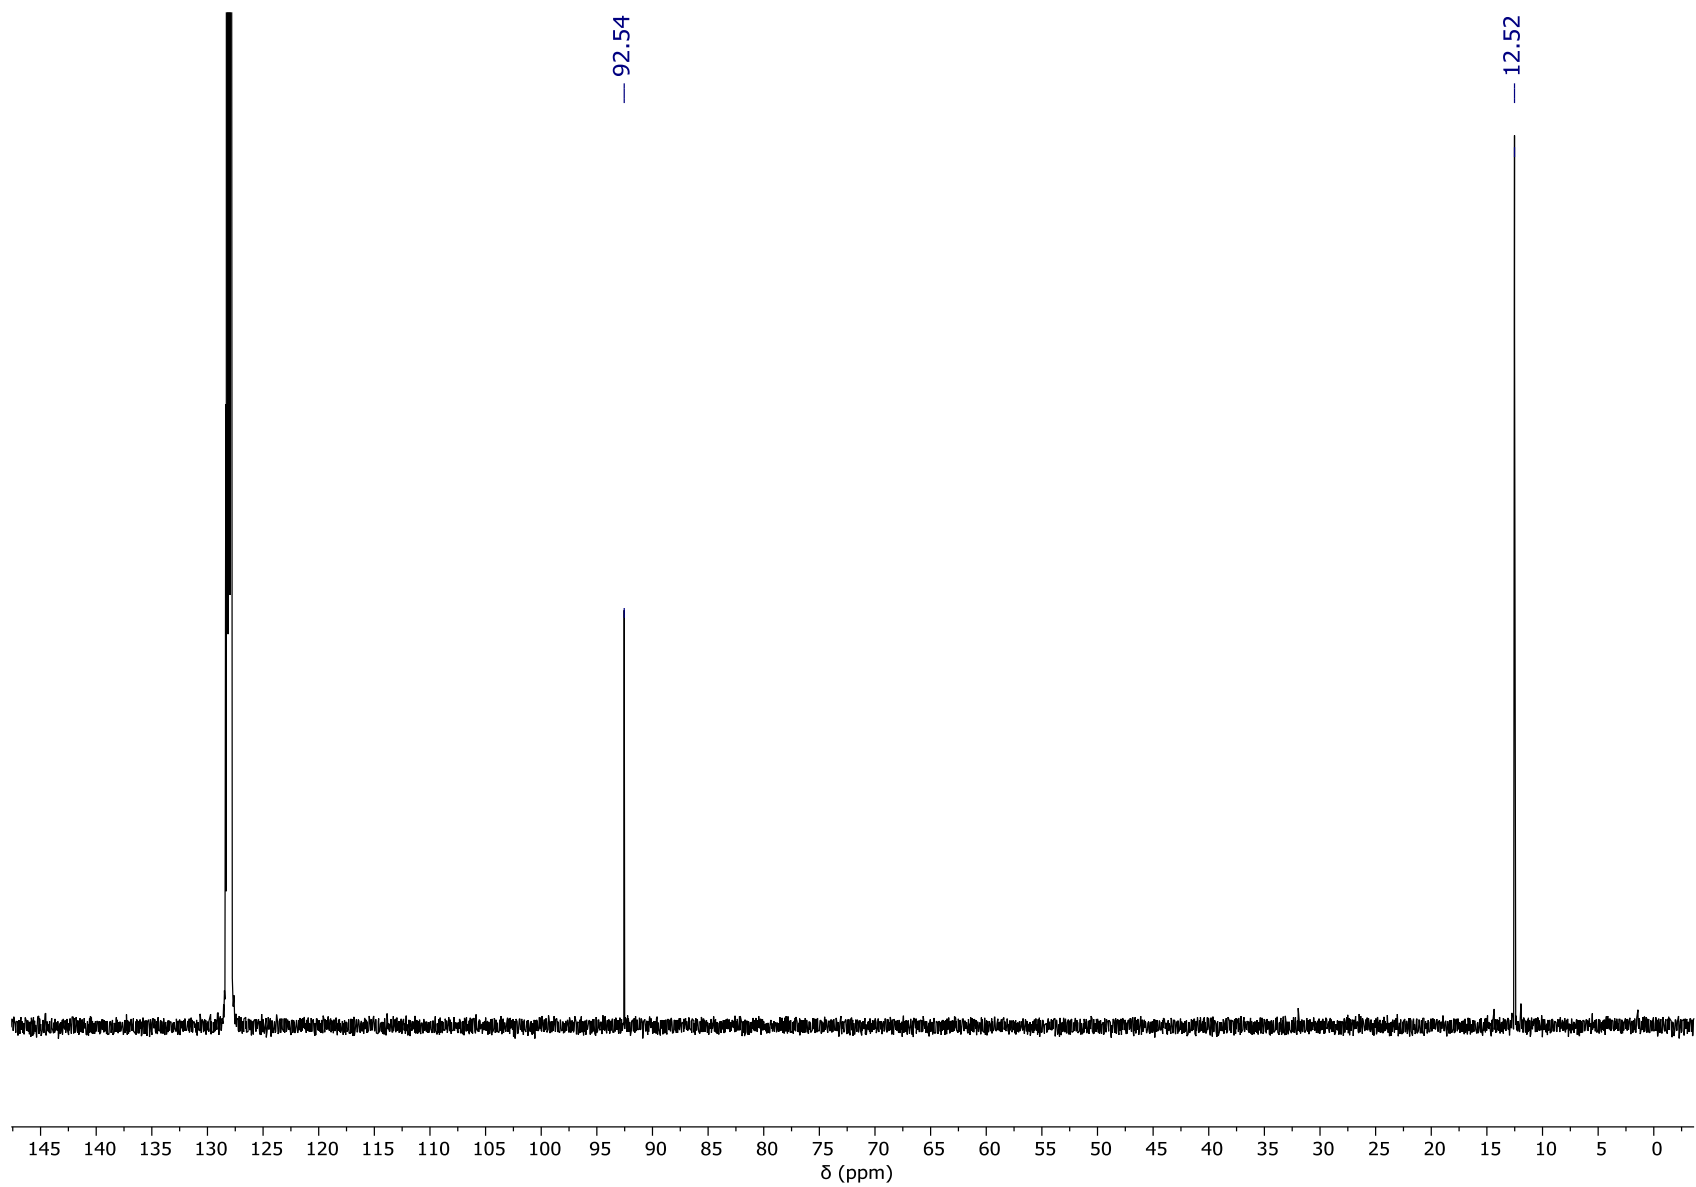

**Figure S9.**  $^{13}\text{C}\{^1\text{H}\}$  NMR spectrum of **2-Th** at 298 K in  $\text{C}_6\text{D}_6$ .

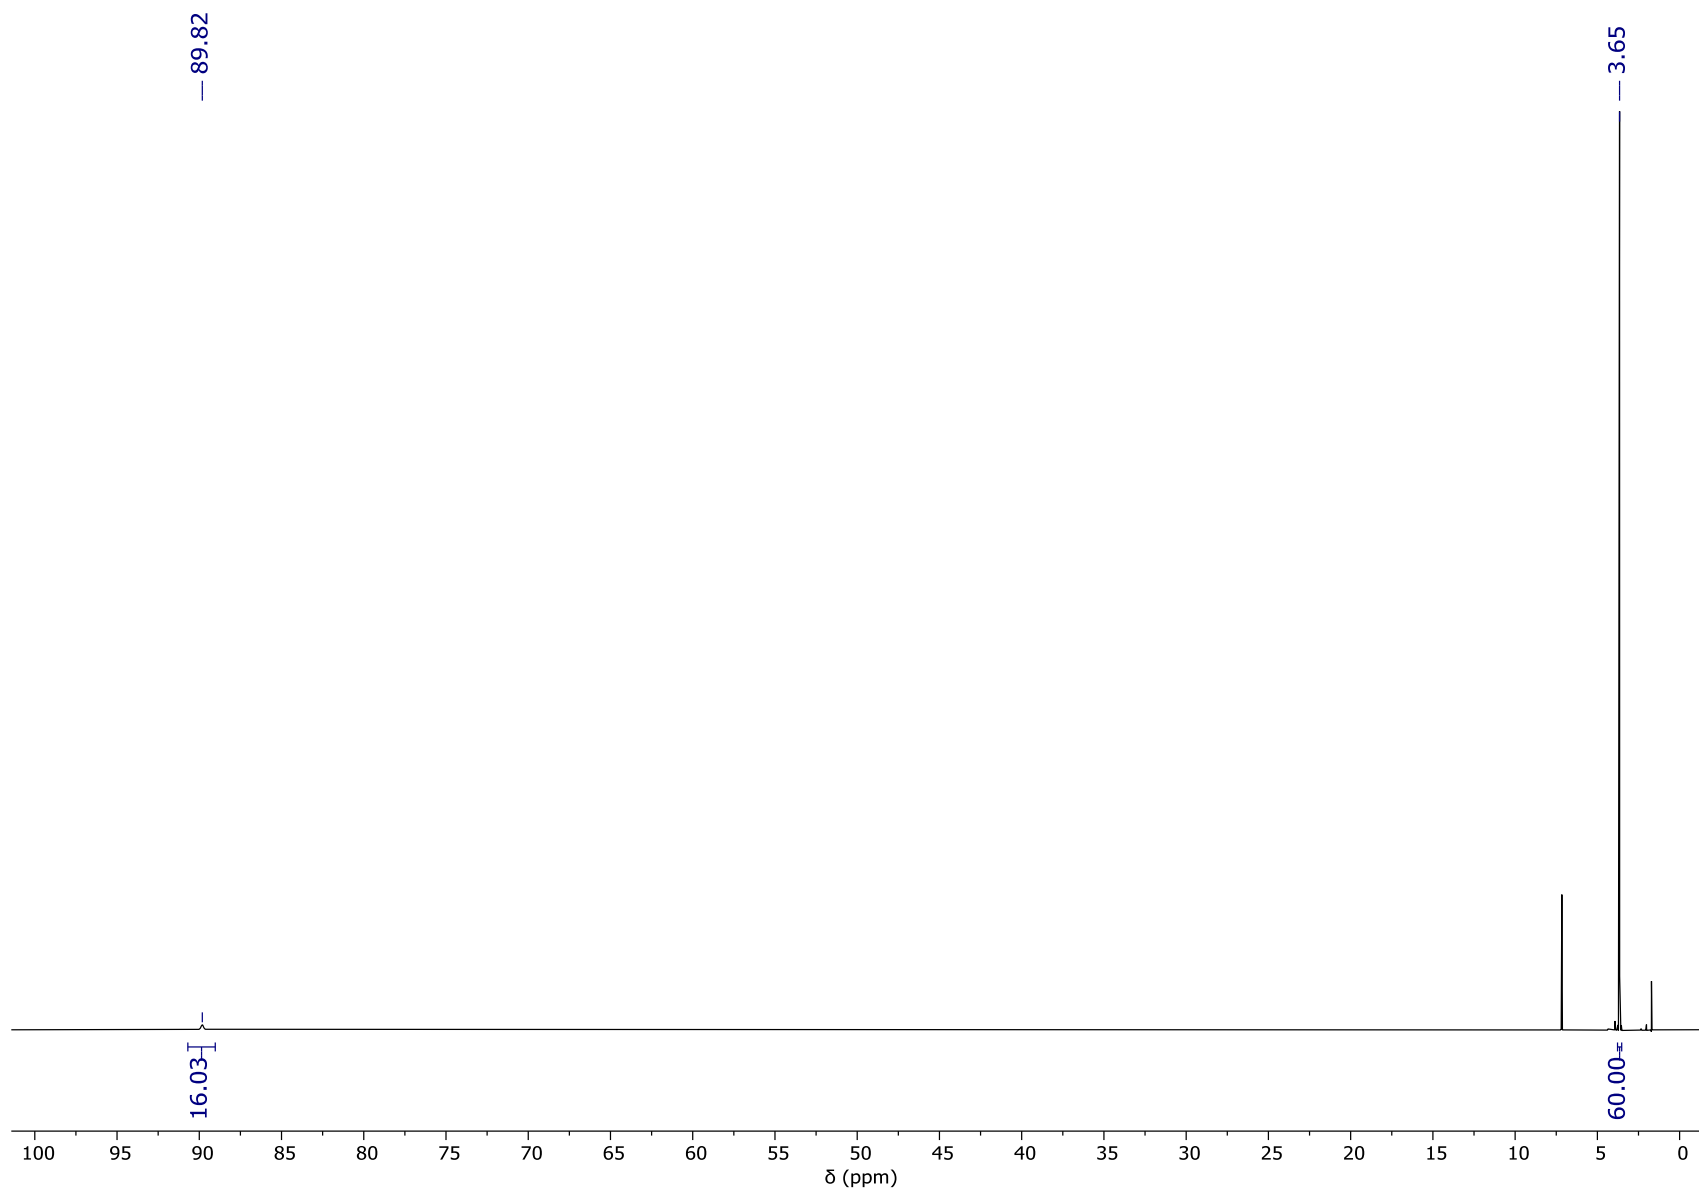

**Figure S10.**  $^1\text{H}$  NMR spectrum of **2-U** at 298 K in  $\text{C}_6\text{D}_6$ .

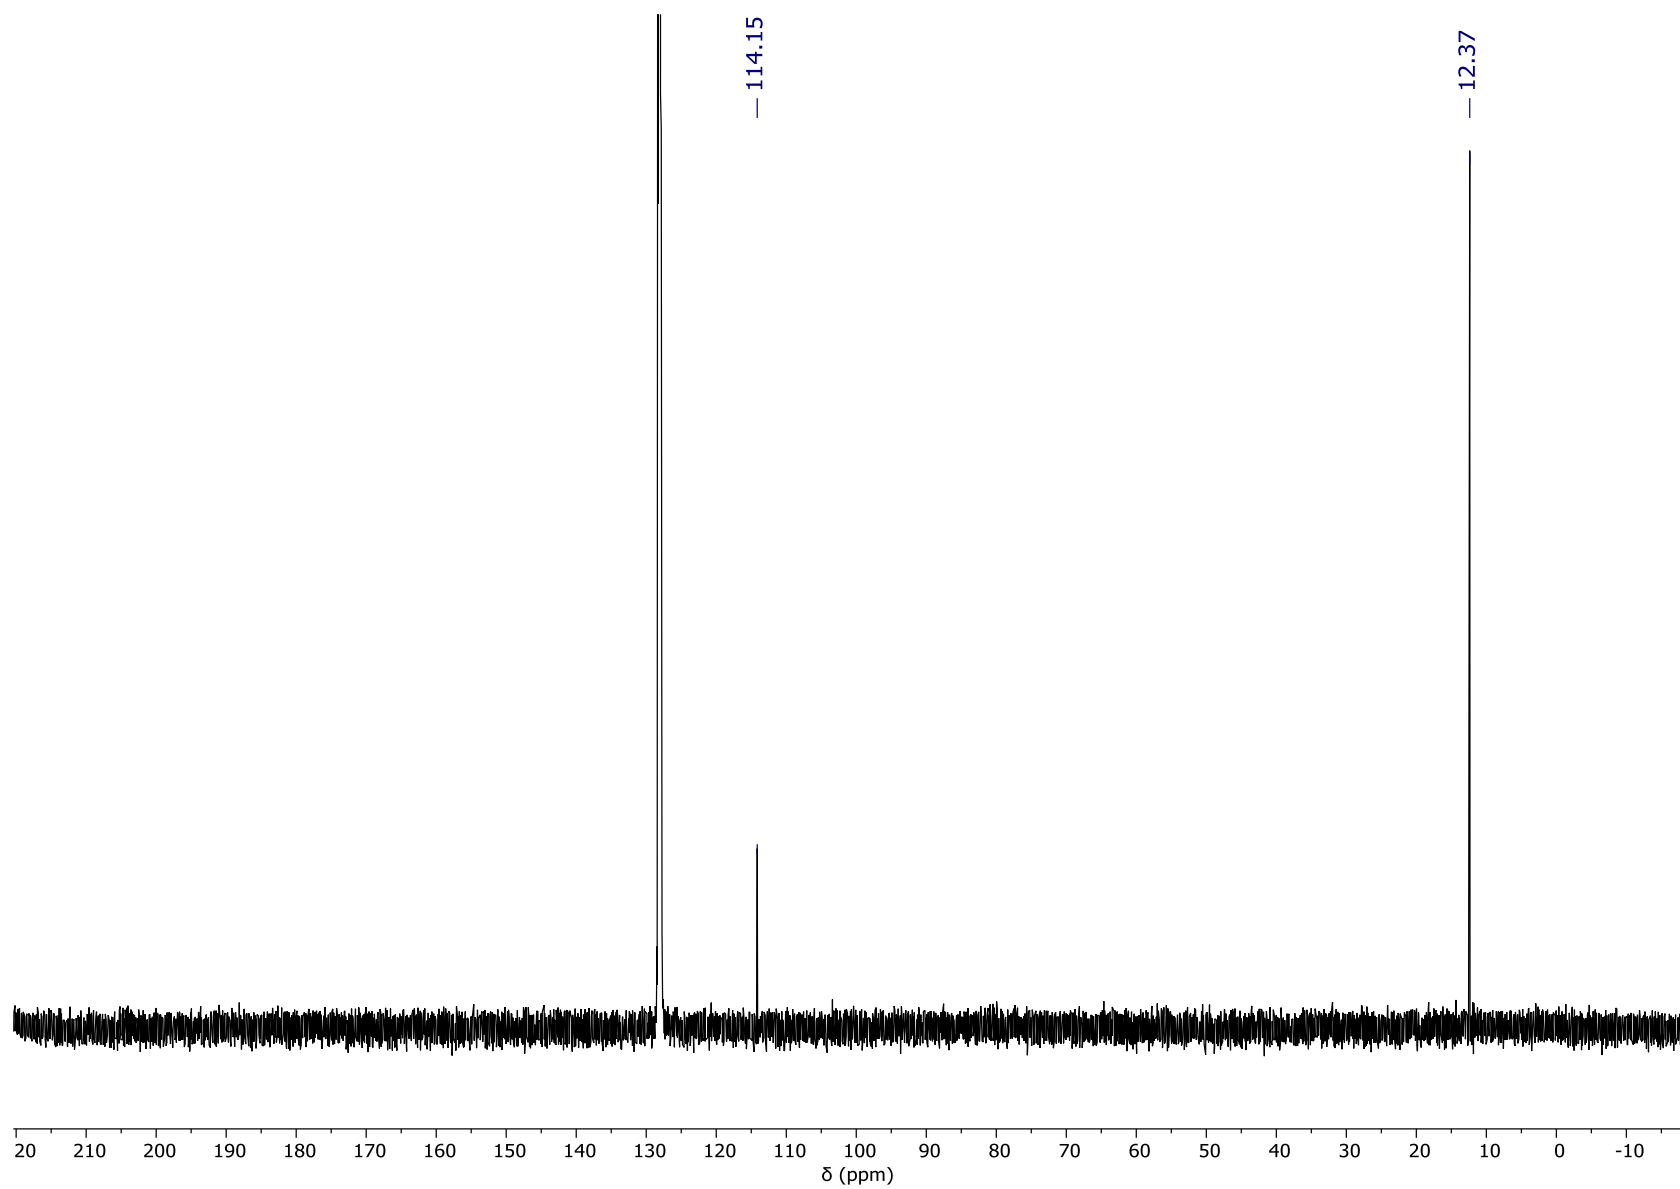

**Figure S11.**  $^{13}\text{C}\{^1\text{H}\}$  NMR spectrum of **2-U** at 298 K in  $\text{C}_6\text{D}_6$ .

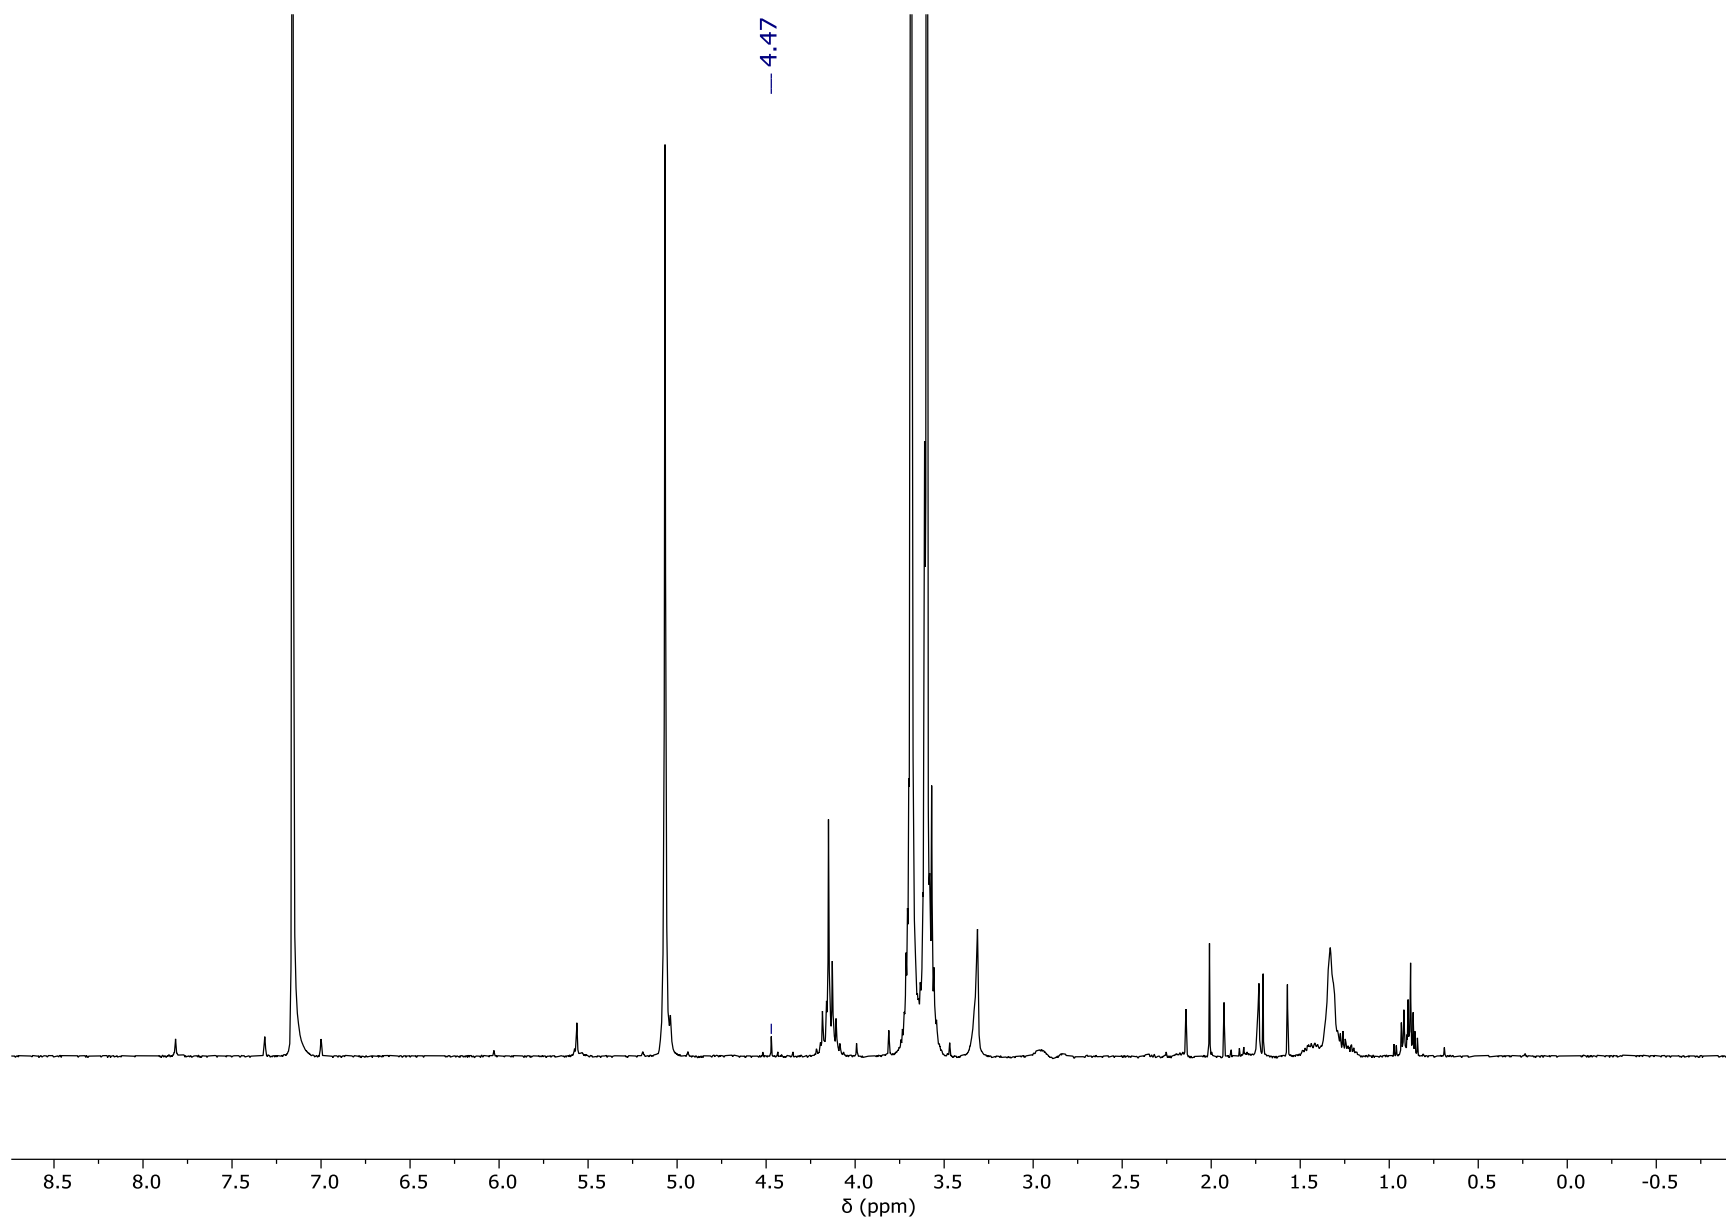

**Figure S12.** Crude  $^1\text{H}$  NMR spectrum of the photolysis of **2-U** in  $\text{C}_6\text{D}_6$ , evidencing production of  $\text{H}_2$  (4.47 ppm in  $\text{C}_6\text{D}_6$ ).

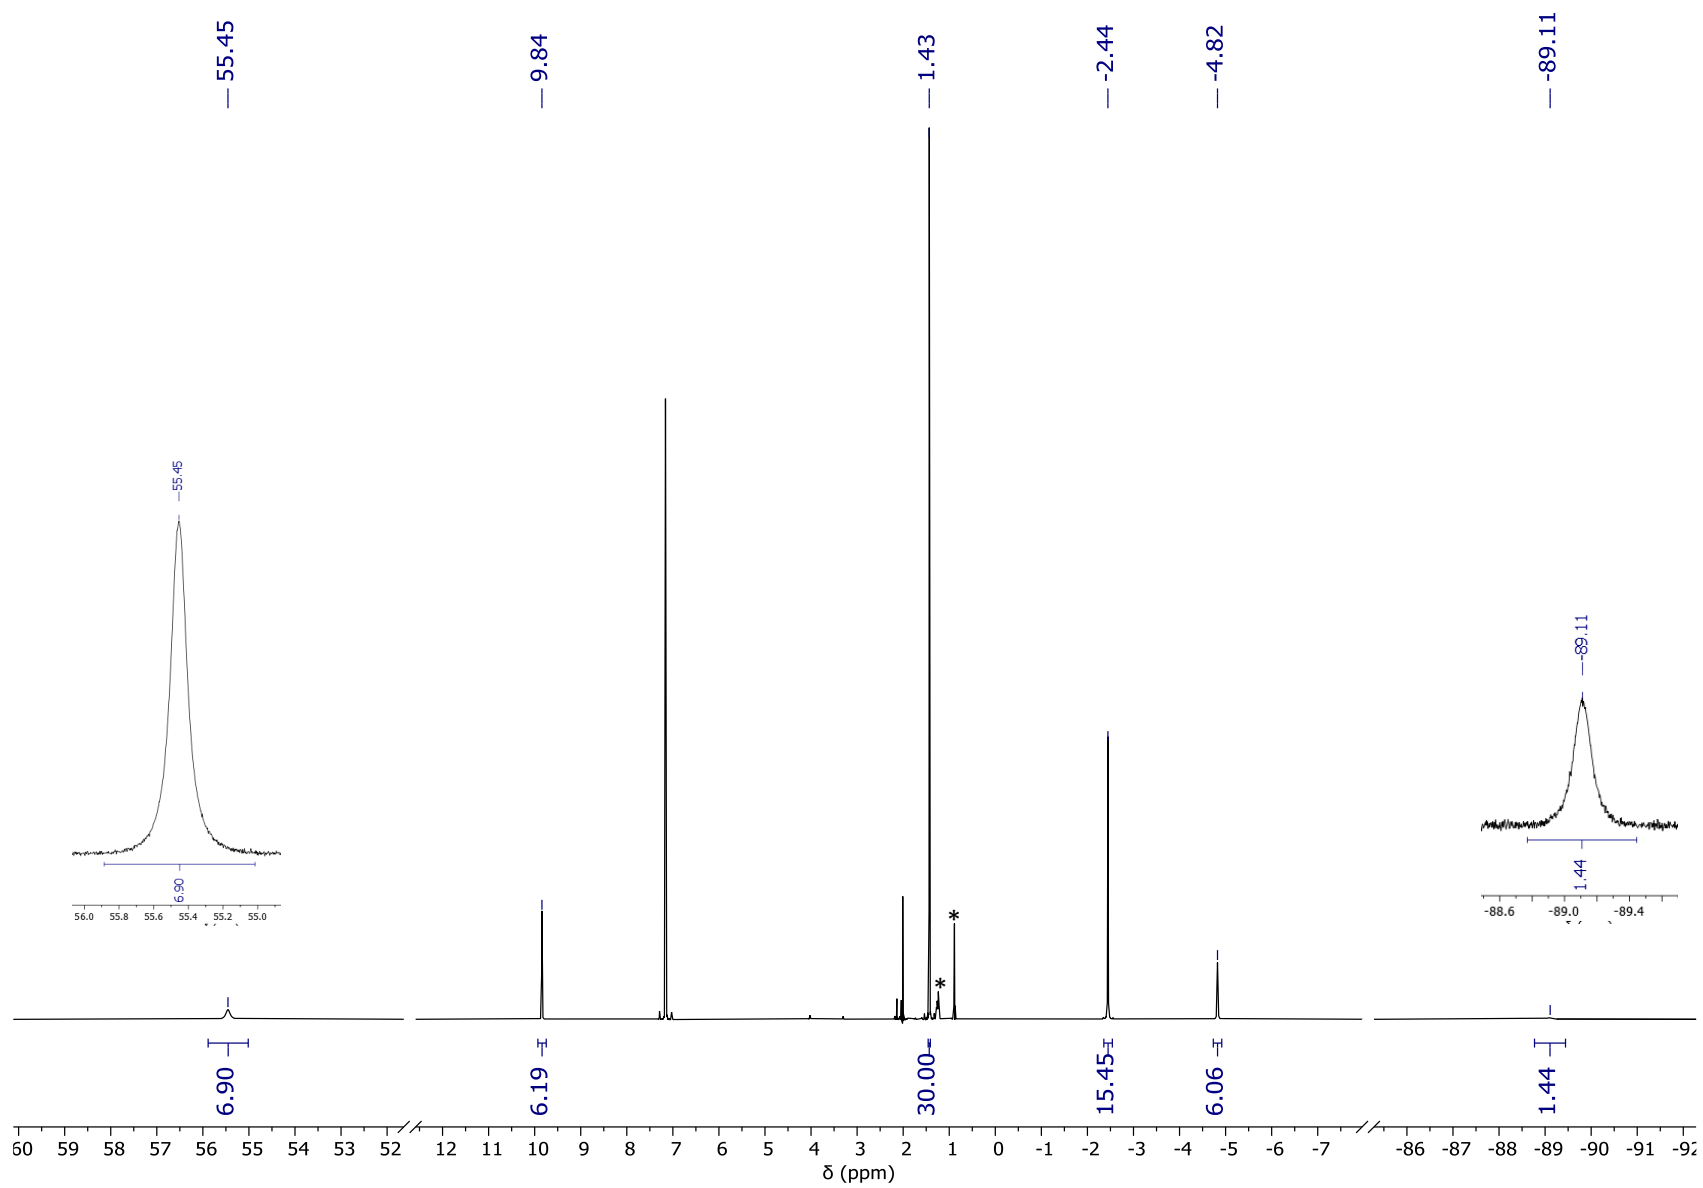

**Figure S13.**  $^1\text{H}$  NMR spectrum of **3-U** at 298 K in  $\text{C}_6\text{D}_6$ , \* = *n*-hexane. Insets: zoomed in view of upfield and downfield peaks.

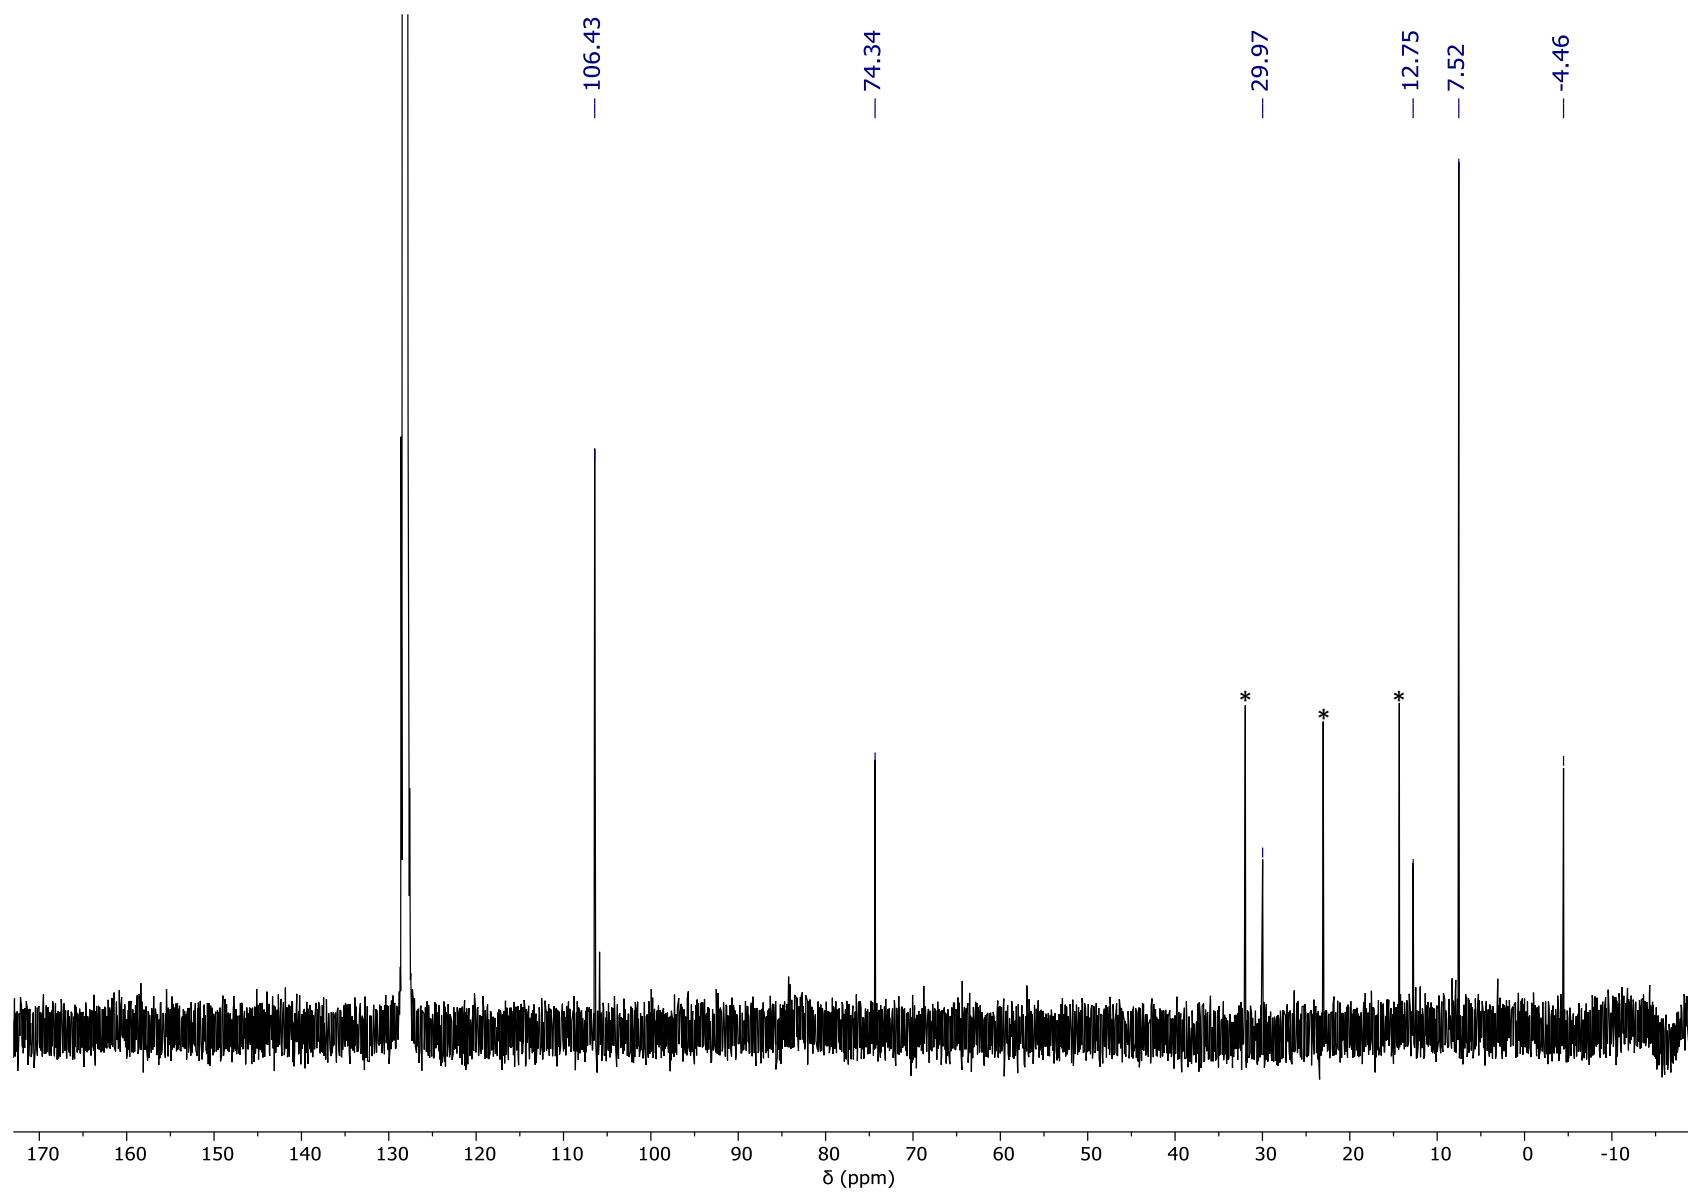

**Figure S14.**  $^{13}\text{C}\{^1\text{H}\}$  NMR spectrum of **3-U** at 298 K in  $\text{C}_6\text{D}_6$ , \* = *n*-hexane.



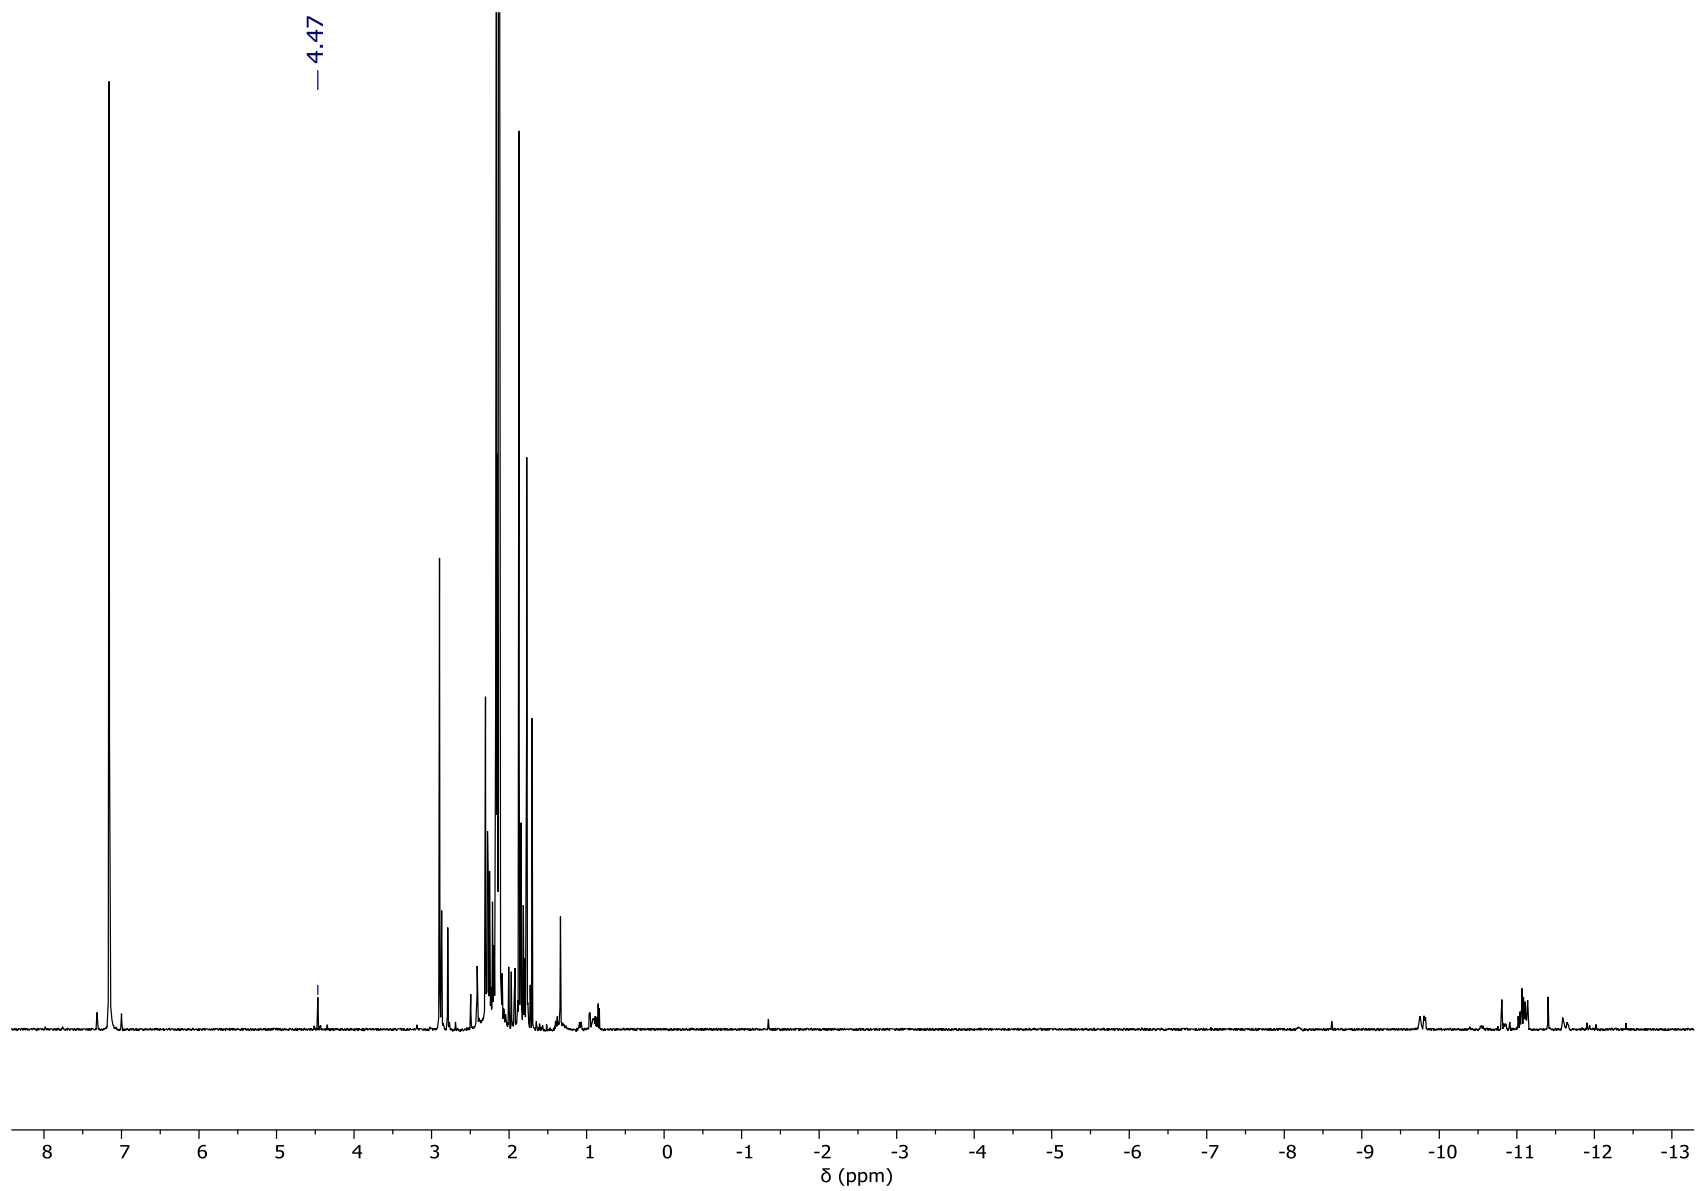

**Figure S15.** Crude <sup>1</sup>H NMR spectrum of the photolysis of **2-Th** in C<sub>6</sub>D<sub>6</sub>, evidencing production of H<sub>2</sub> (4.47 ppm in C<sub>6</sub>D<sub>6</sub>).

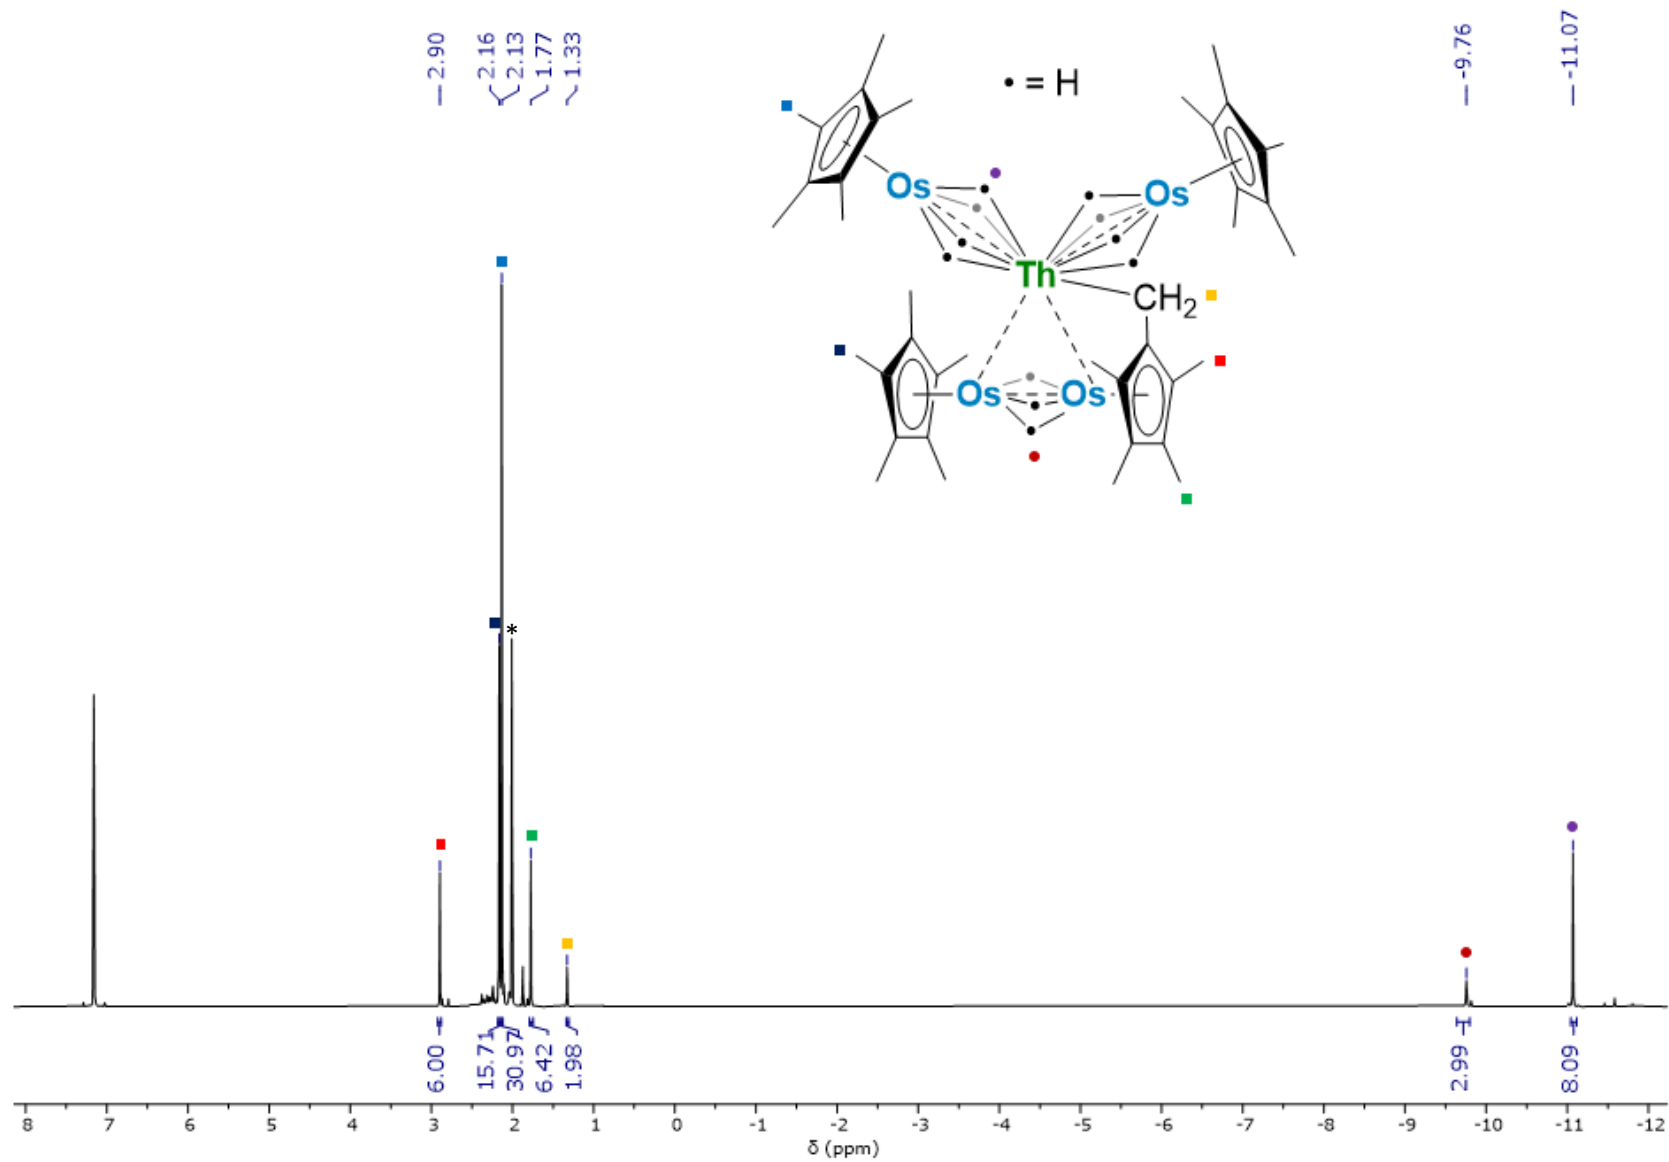

**Figure S16.**  $^1\text{H}$  NMR of isolated **3-Th** at 298 K in  $\text{C}_6\text{D}_6$ , \* =  $[\text{Cp}^*\text{OsH}_2]_2$  decomp. product.

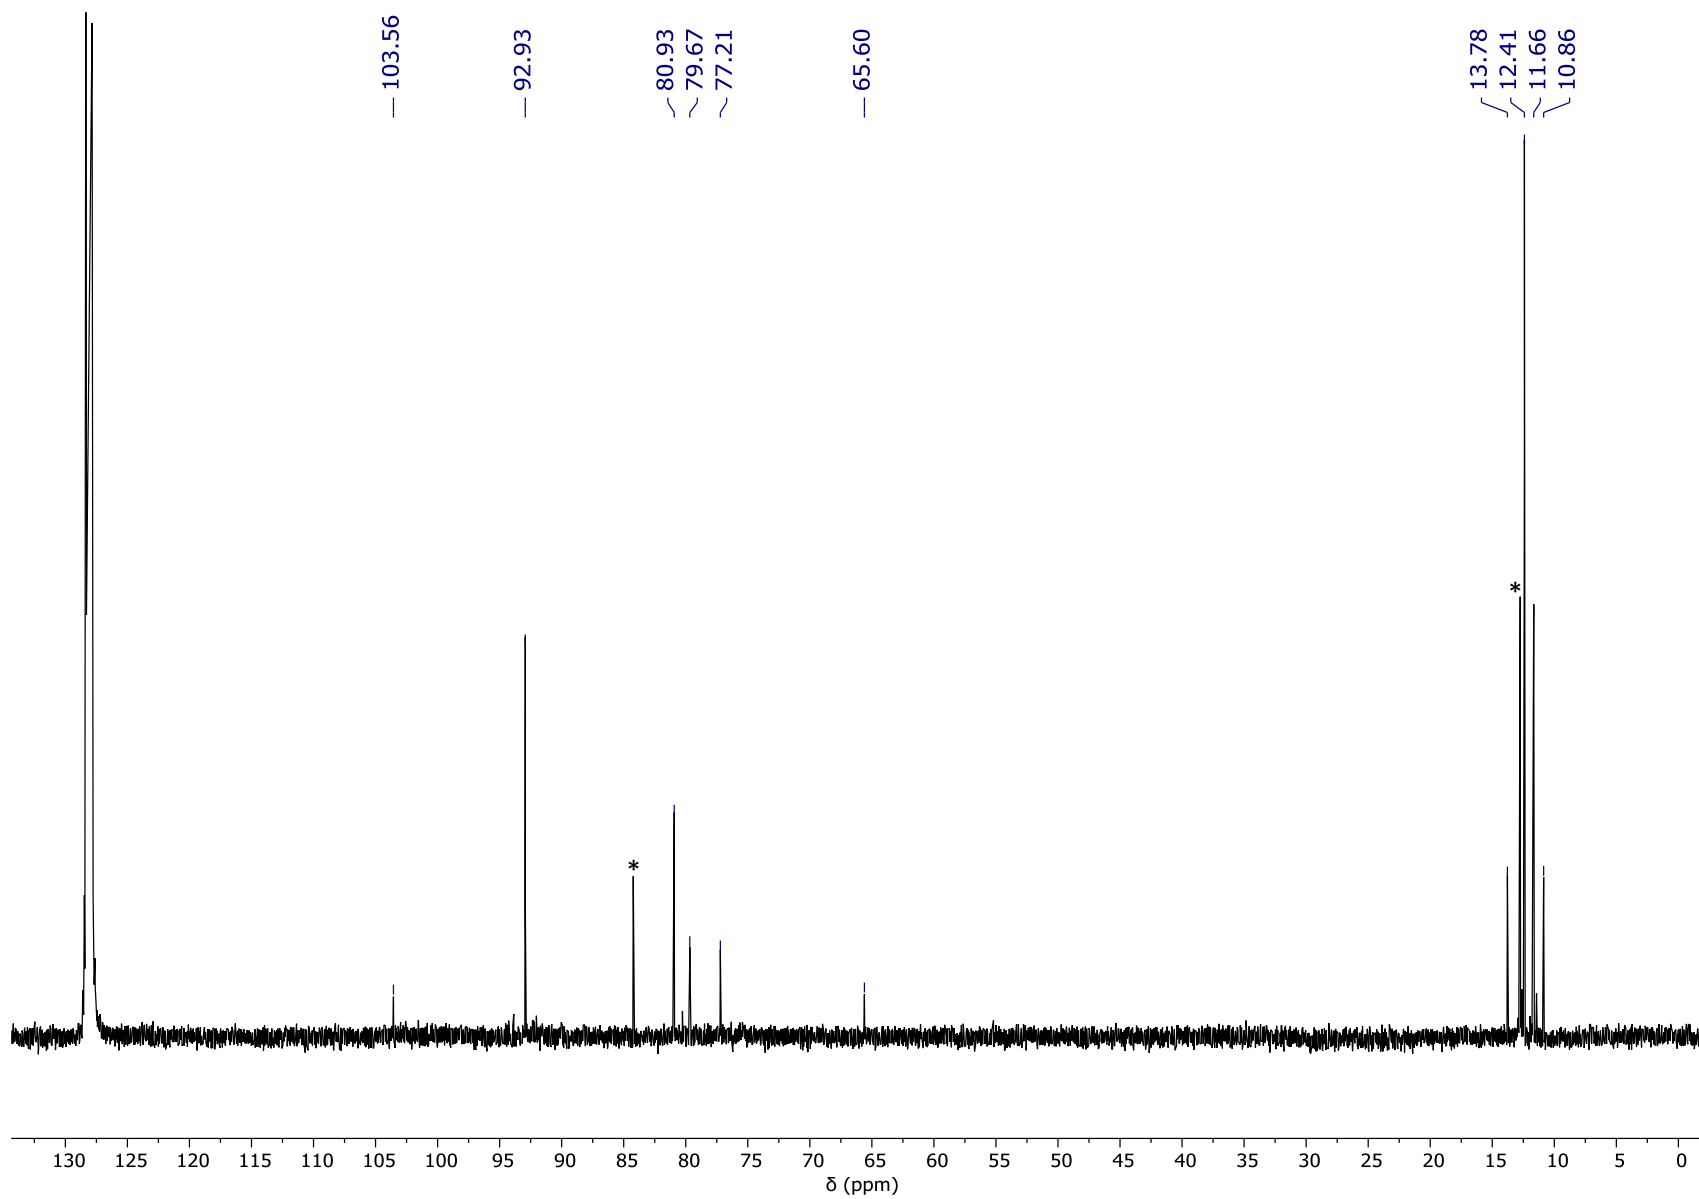

**Figure S17.**  $^{13}\text{C}\{^1\text{H}\}$  NMR of isolated **3-Th** at 298 K in  $\text{C}_6\text{D}_6$ , \* =  $[\text{Cp}^*\text{OsH}_2]_2$  decomp. product.

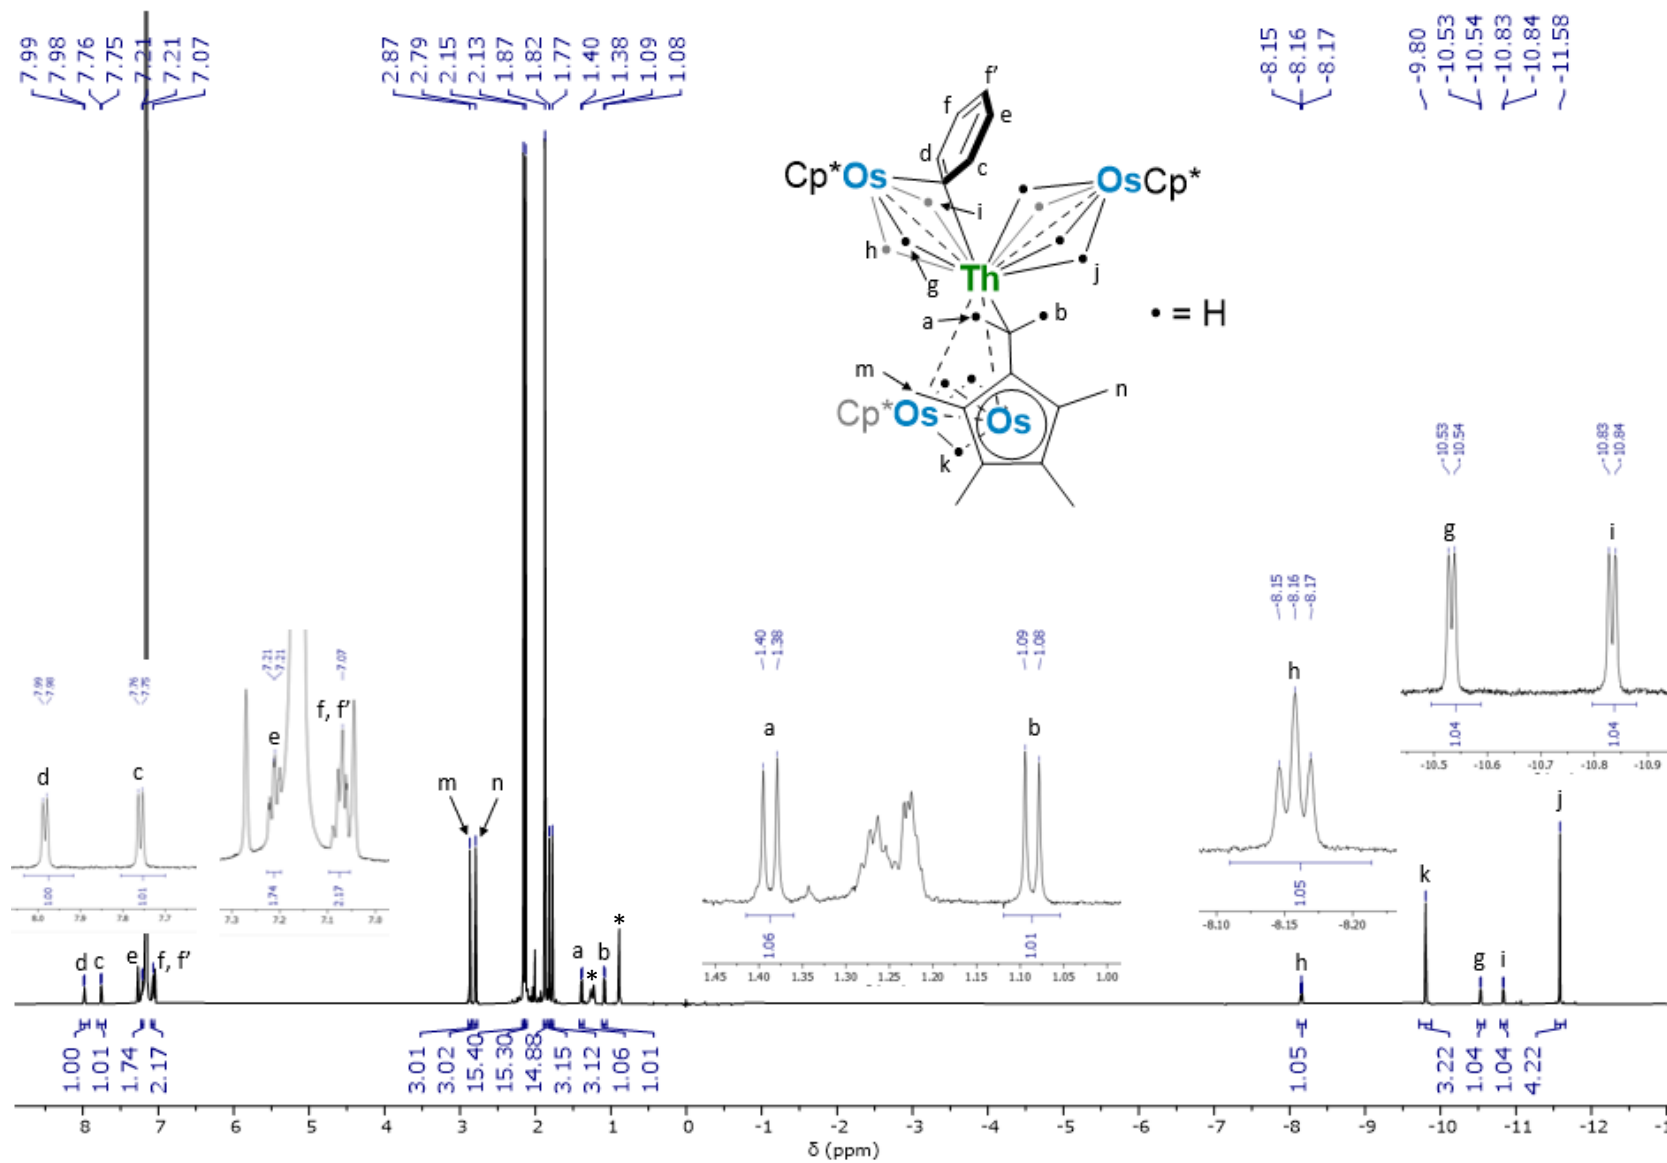

**Figure S18.**  $^1\text{H}$  NMR spectrum of isolated **4-Th** at 298 K in  $\text{C}_6\text{D}_6$ , \* = *n*-hexane. Insets: zoomed in view of peak splitting.

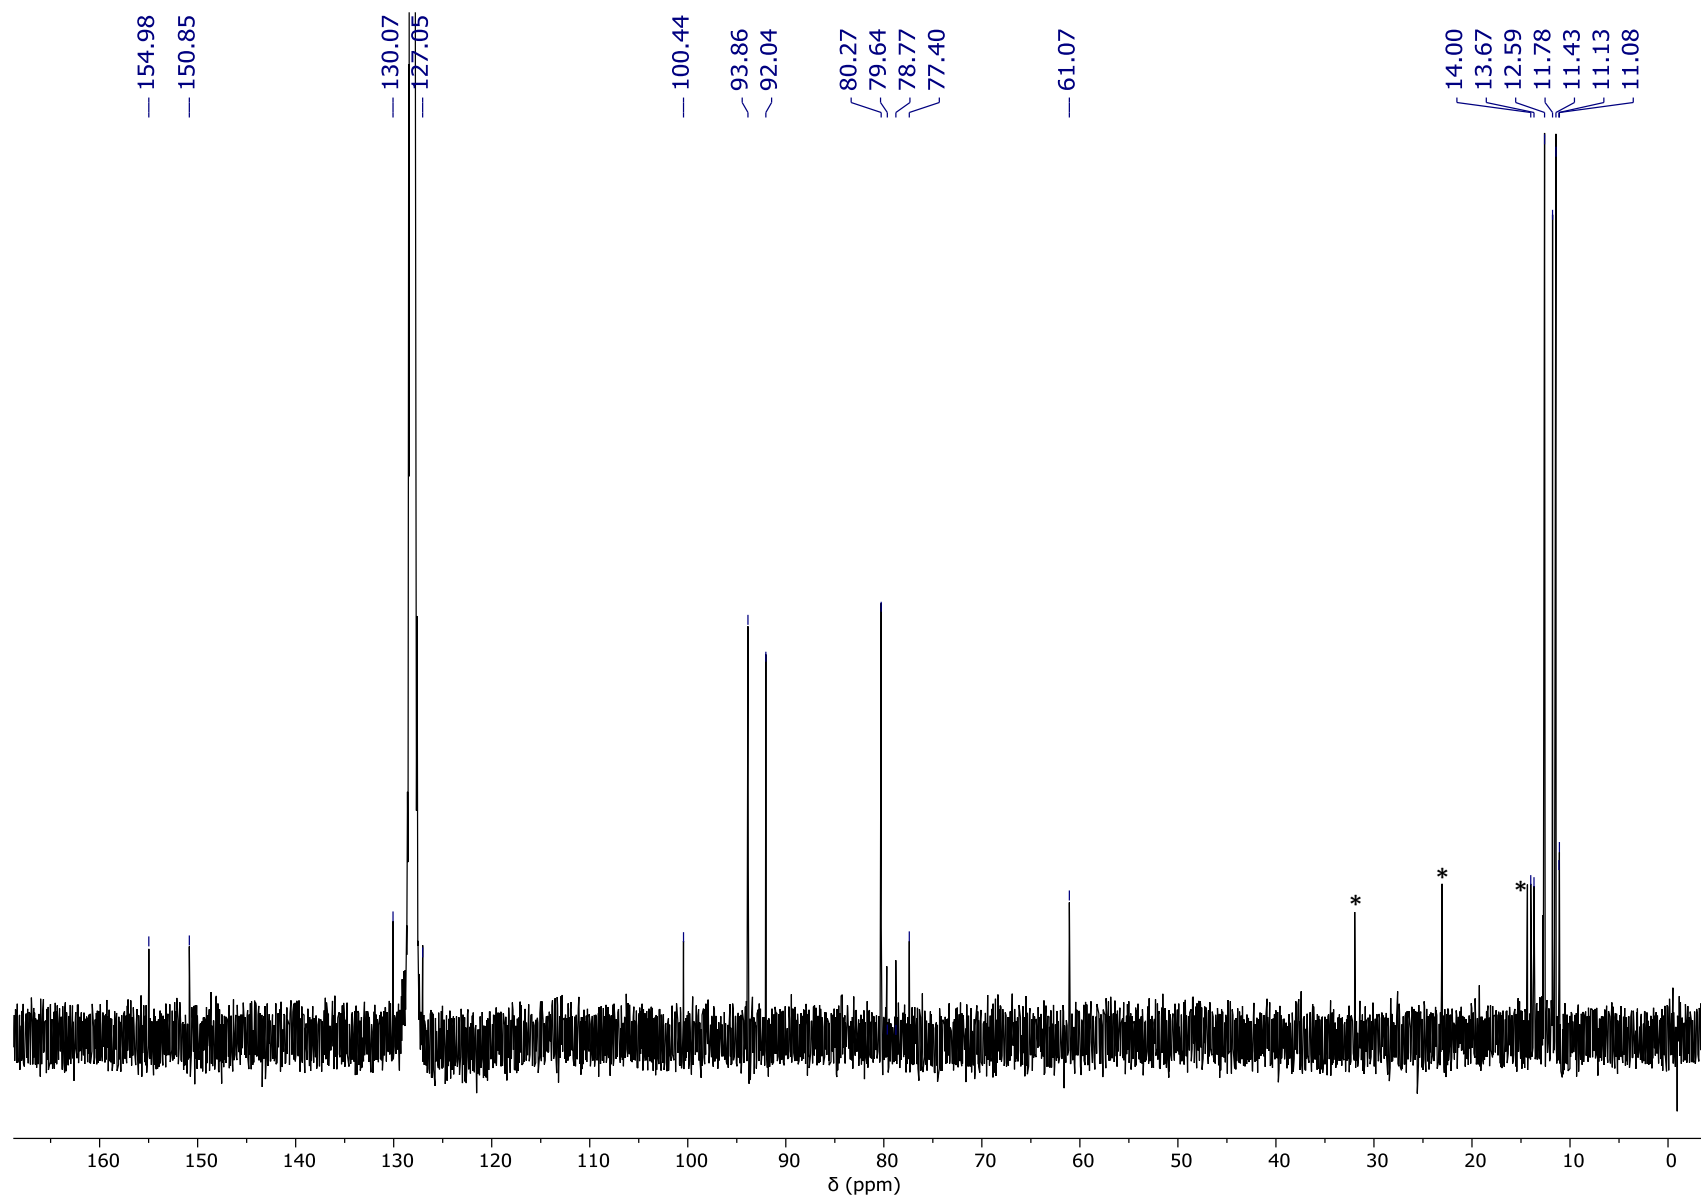

**Figure S19.**  $^{13}\text{C}\{^1\text{H}\}$  NMR spectrum of isolated **4-Th** at 298 K in  $\text{C}_6\text{D}_6$ , \* = *n*-hexane.

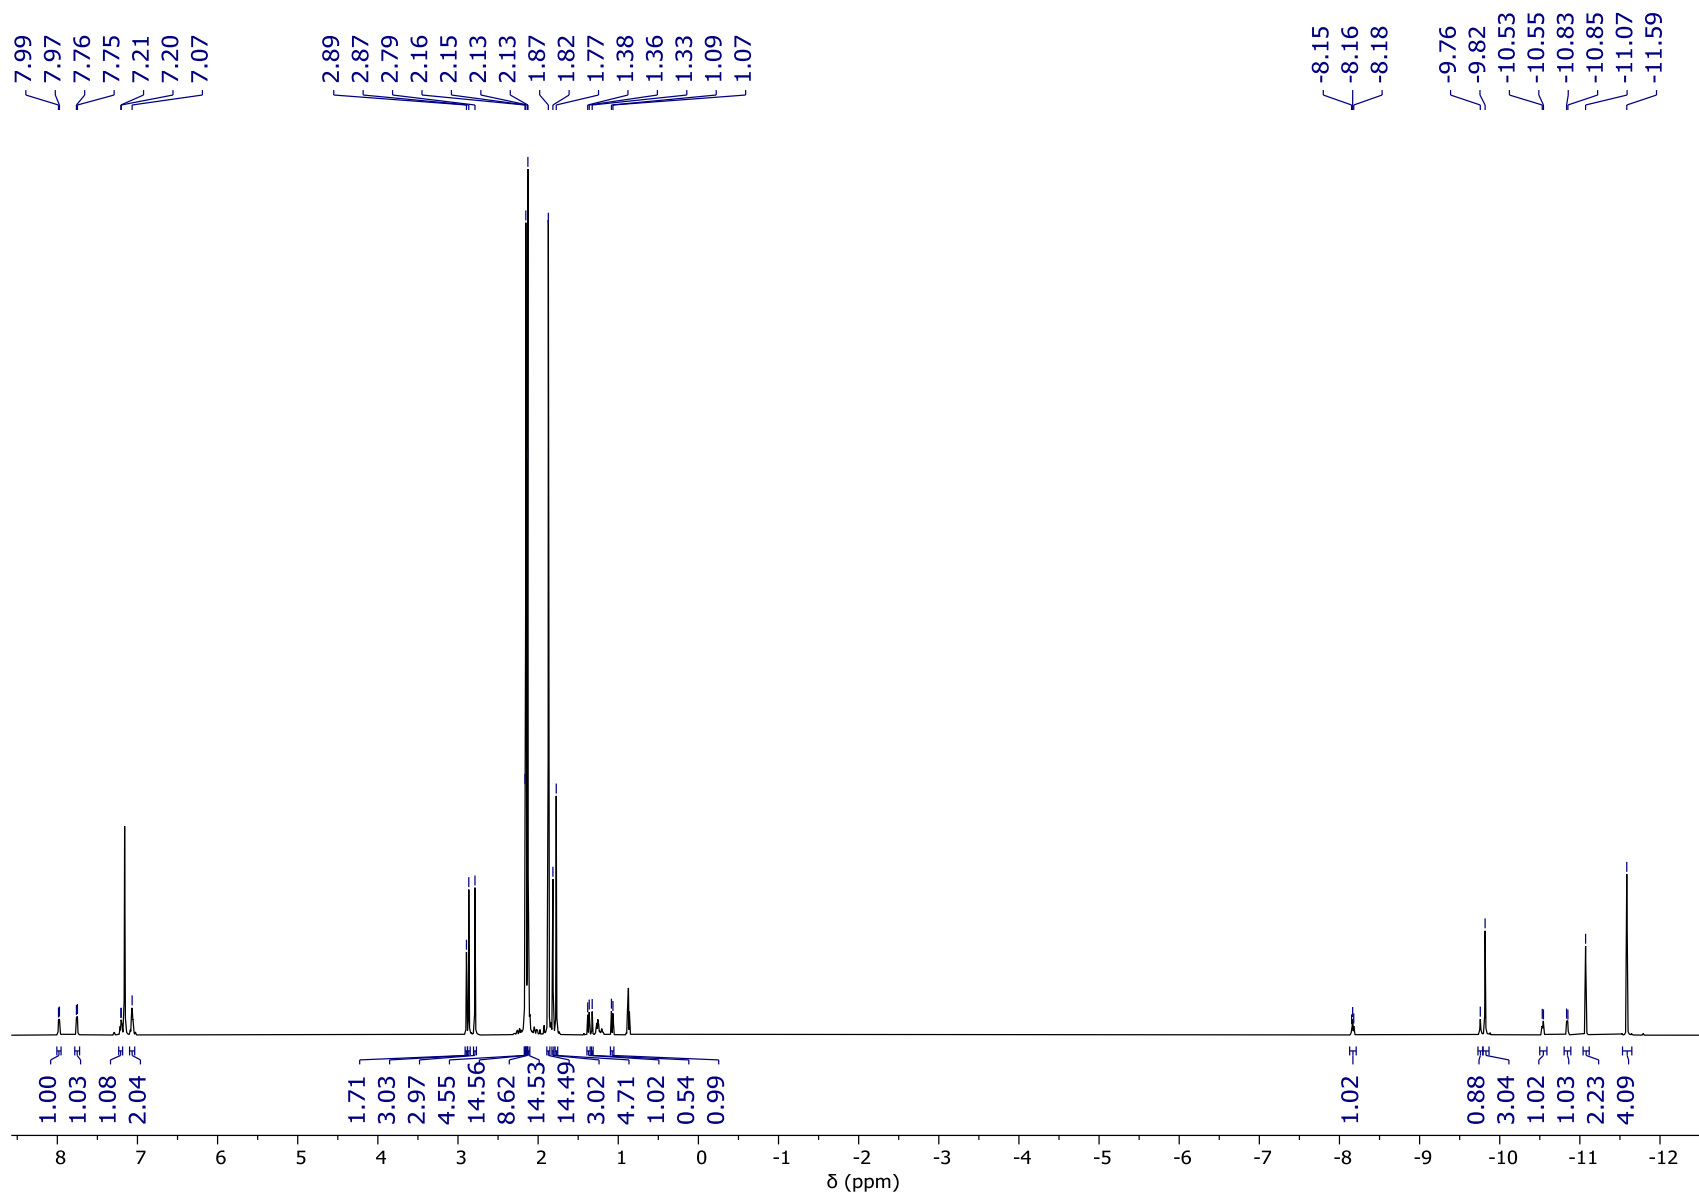

**Figure S20.**  $^1\text{H}$  NMR spectrum of crystallized 22:78 **3-Th/4-Th** at 298 K in  $\text{C}_6\text{D}_6$ .

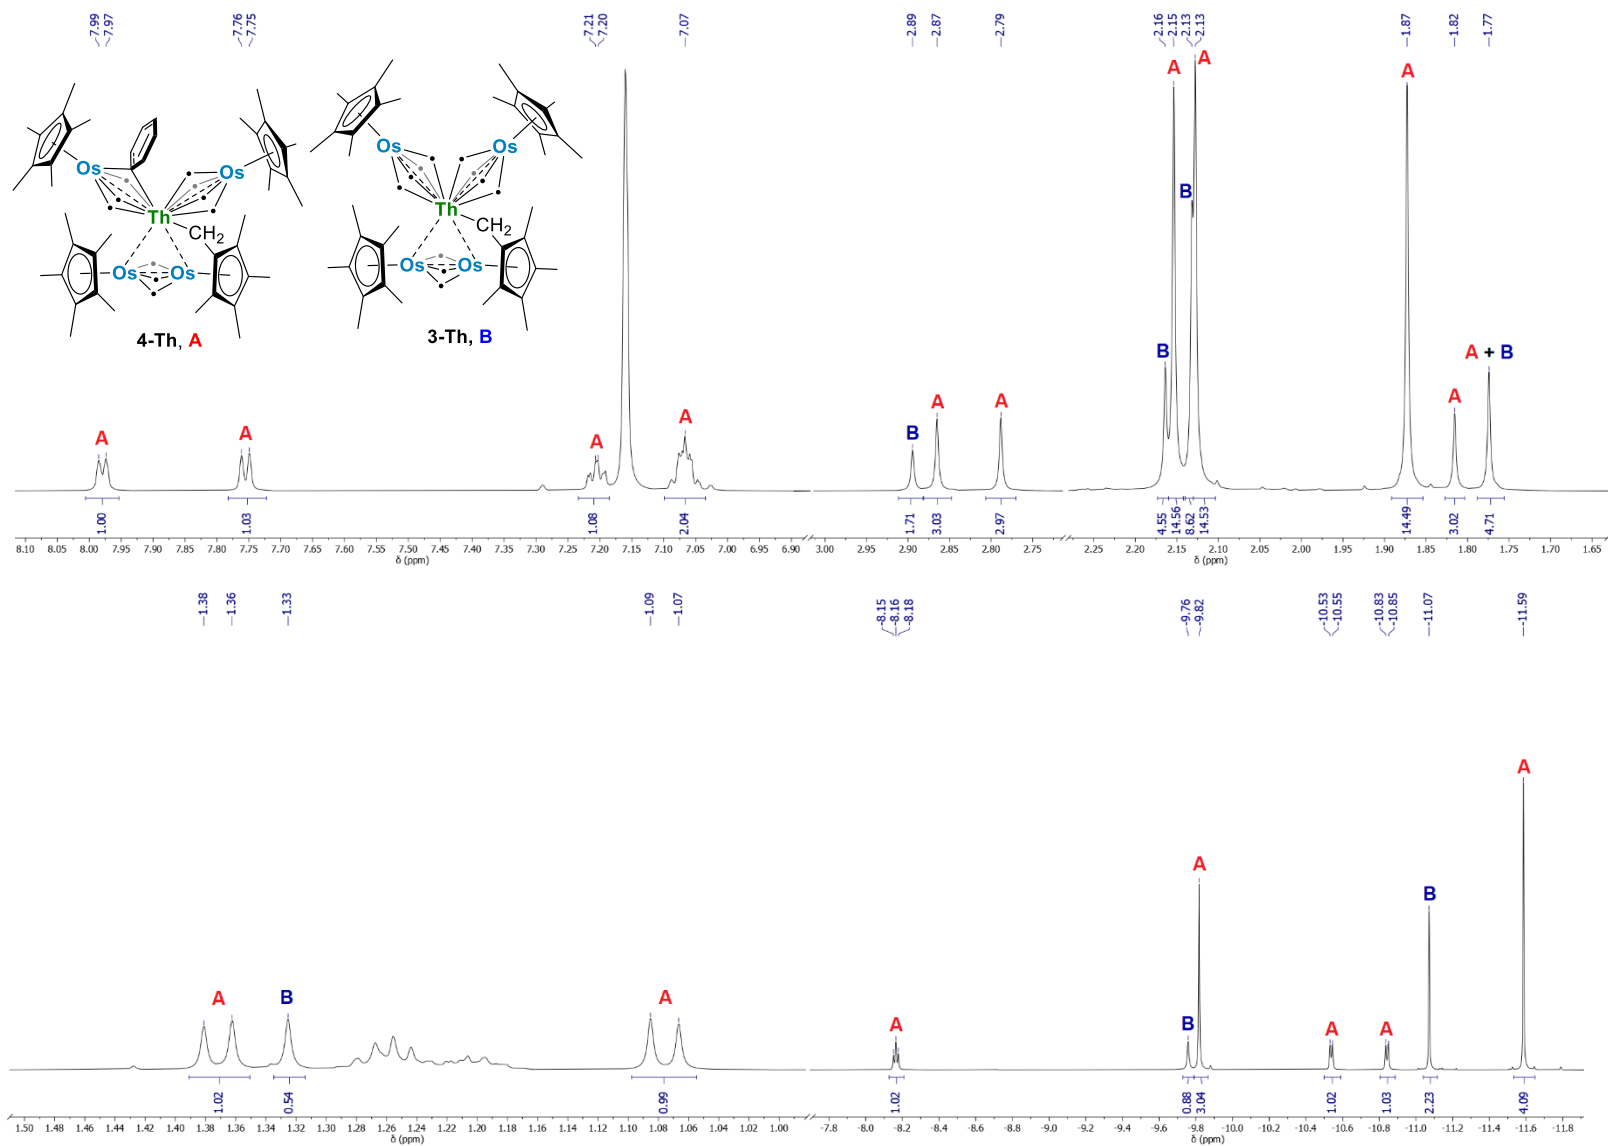

**Figure S21.**  $^1\text{H}$  NMR spectrum of crystallized 22:78 **3-Th/4-Th** at 298 K in  $\text{C}_6\text{D}_6$ , zoomed in and labeled.

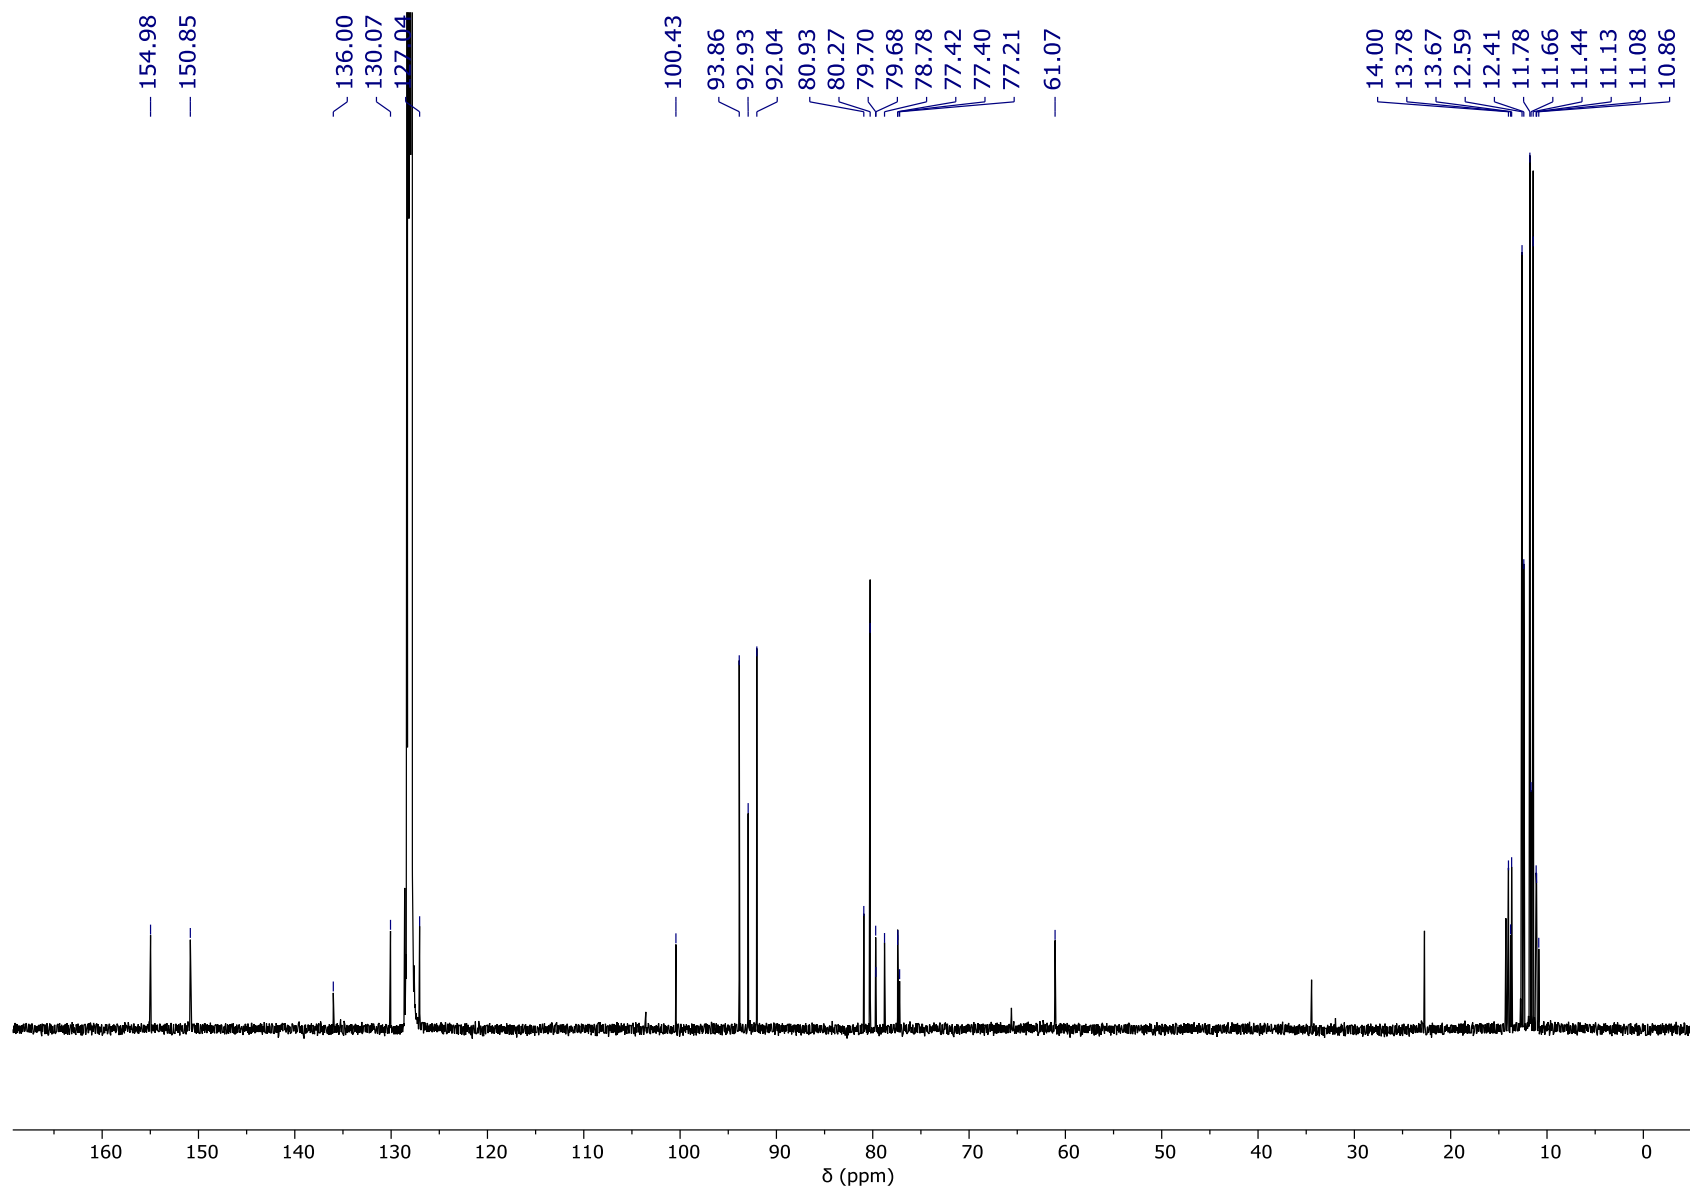

**Figure S22.**  $^{13}\text{C}\{^1\text{H}\}$  NMR spectrum of crystallized 22:78 **3-Th/4-Th** at 298 K in  $\text{C}_6\text{D}_6$ , \* = *n*-pentane.



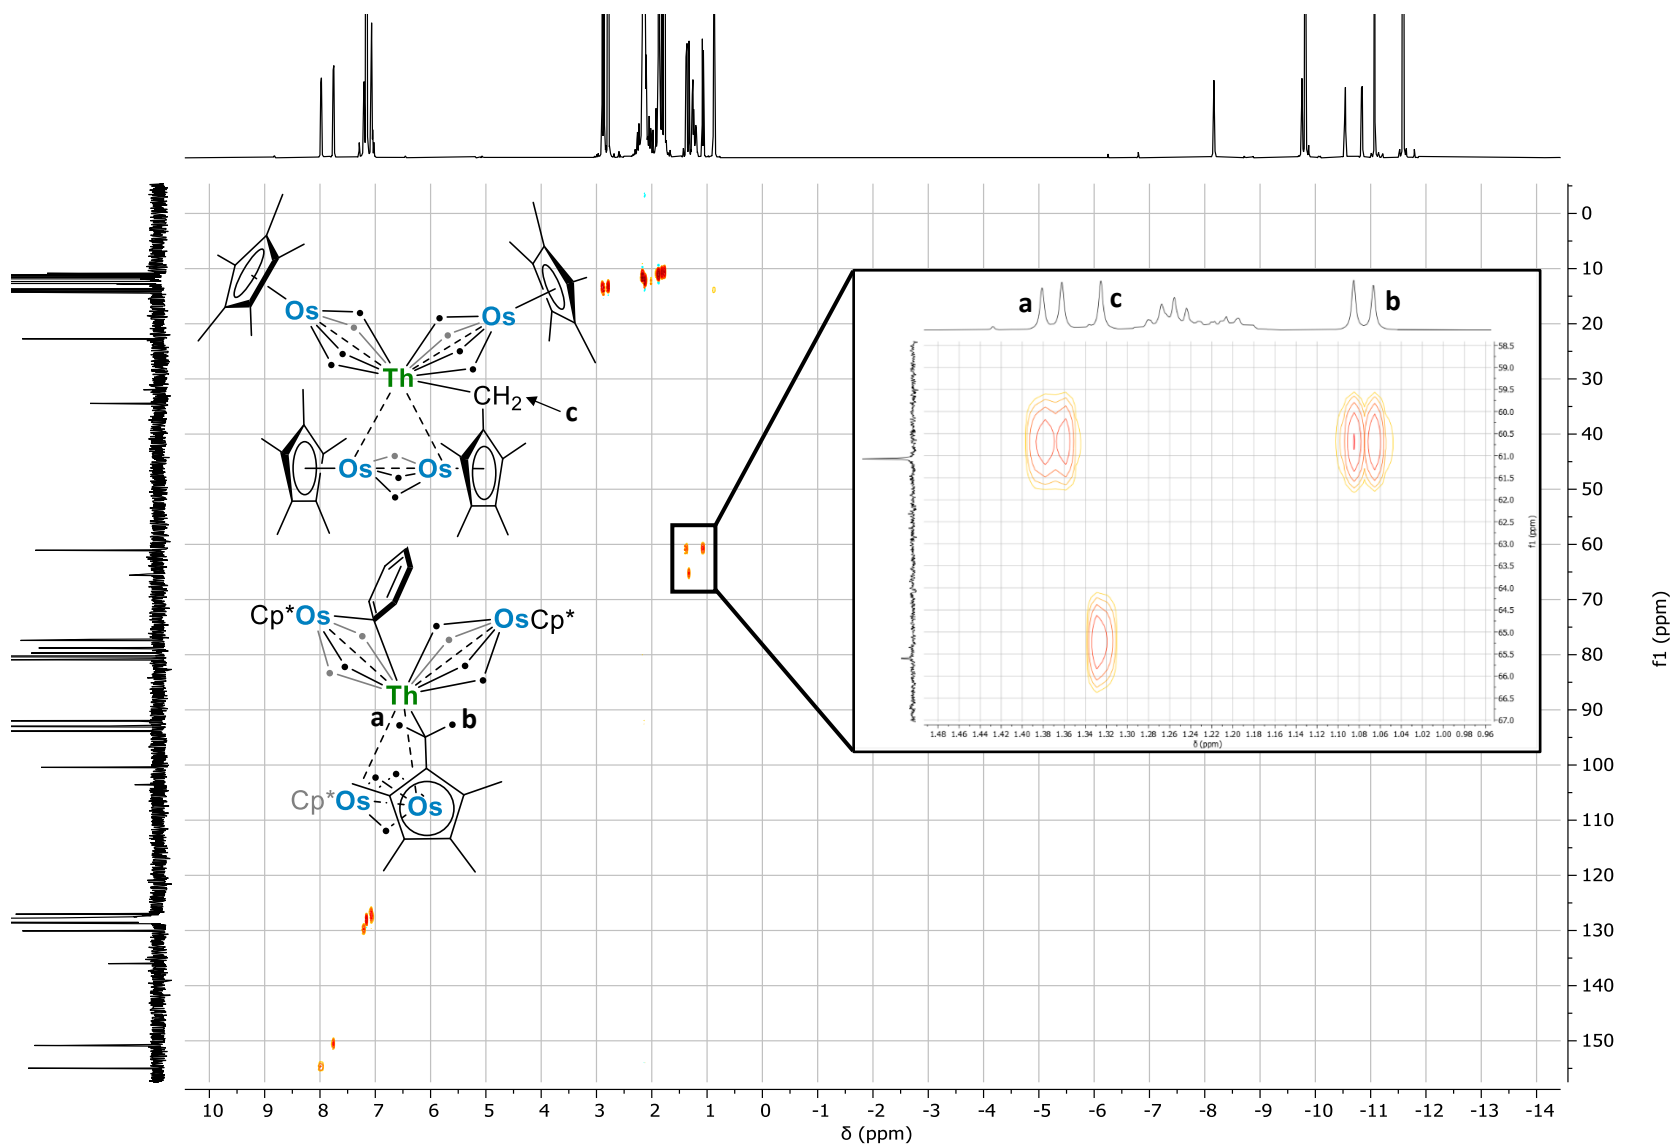

**Figure S23.**  $^1\text{H}$ - $^{13}\text{C}$  HSQC NMR spectrum of crystallized 22:78 **3-Th/4-Th** at 298 K in  $\text{C}_6\text{D}_6$ . Inset: zoomed in view of methylene H-C interactions.

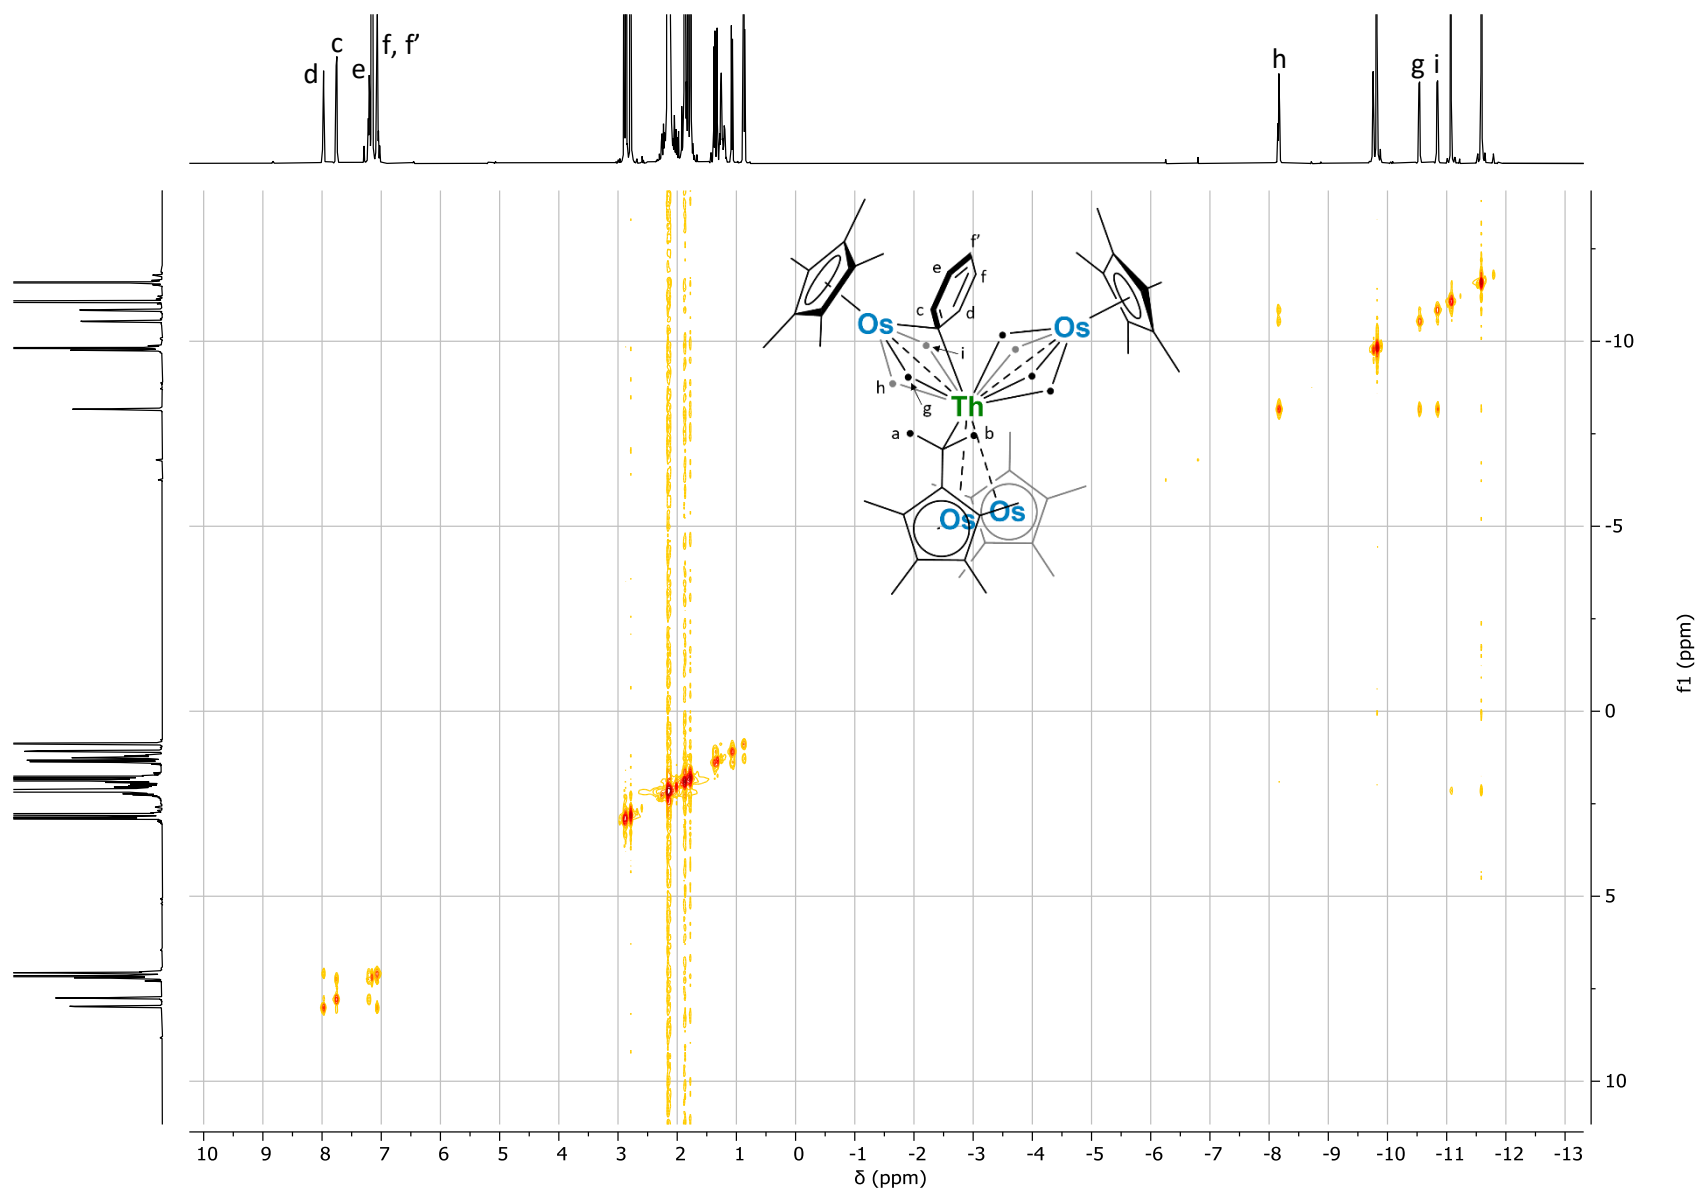

**Figure S24.**  $^1\text{H}$ - $^1\text{H}$  COSY NMR spectrum of crystallized 22:78 **3-Th/4-Th** at 298 K in  $\text{C}_6\text{D}_6$ .

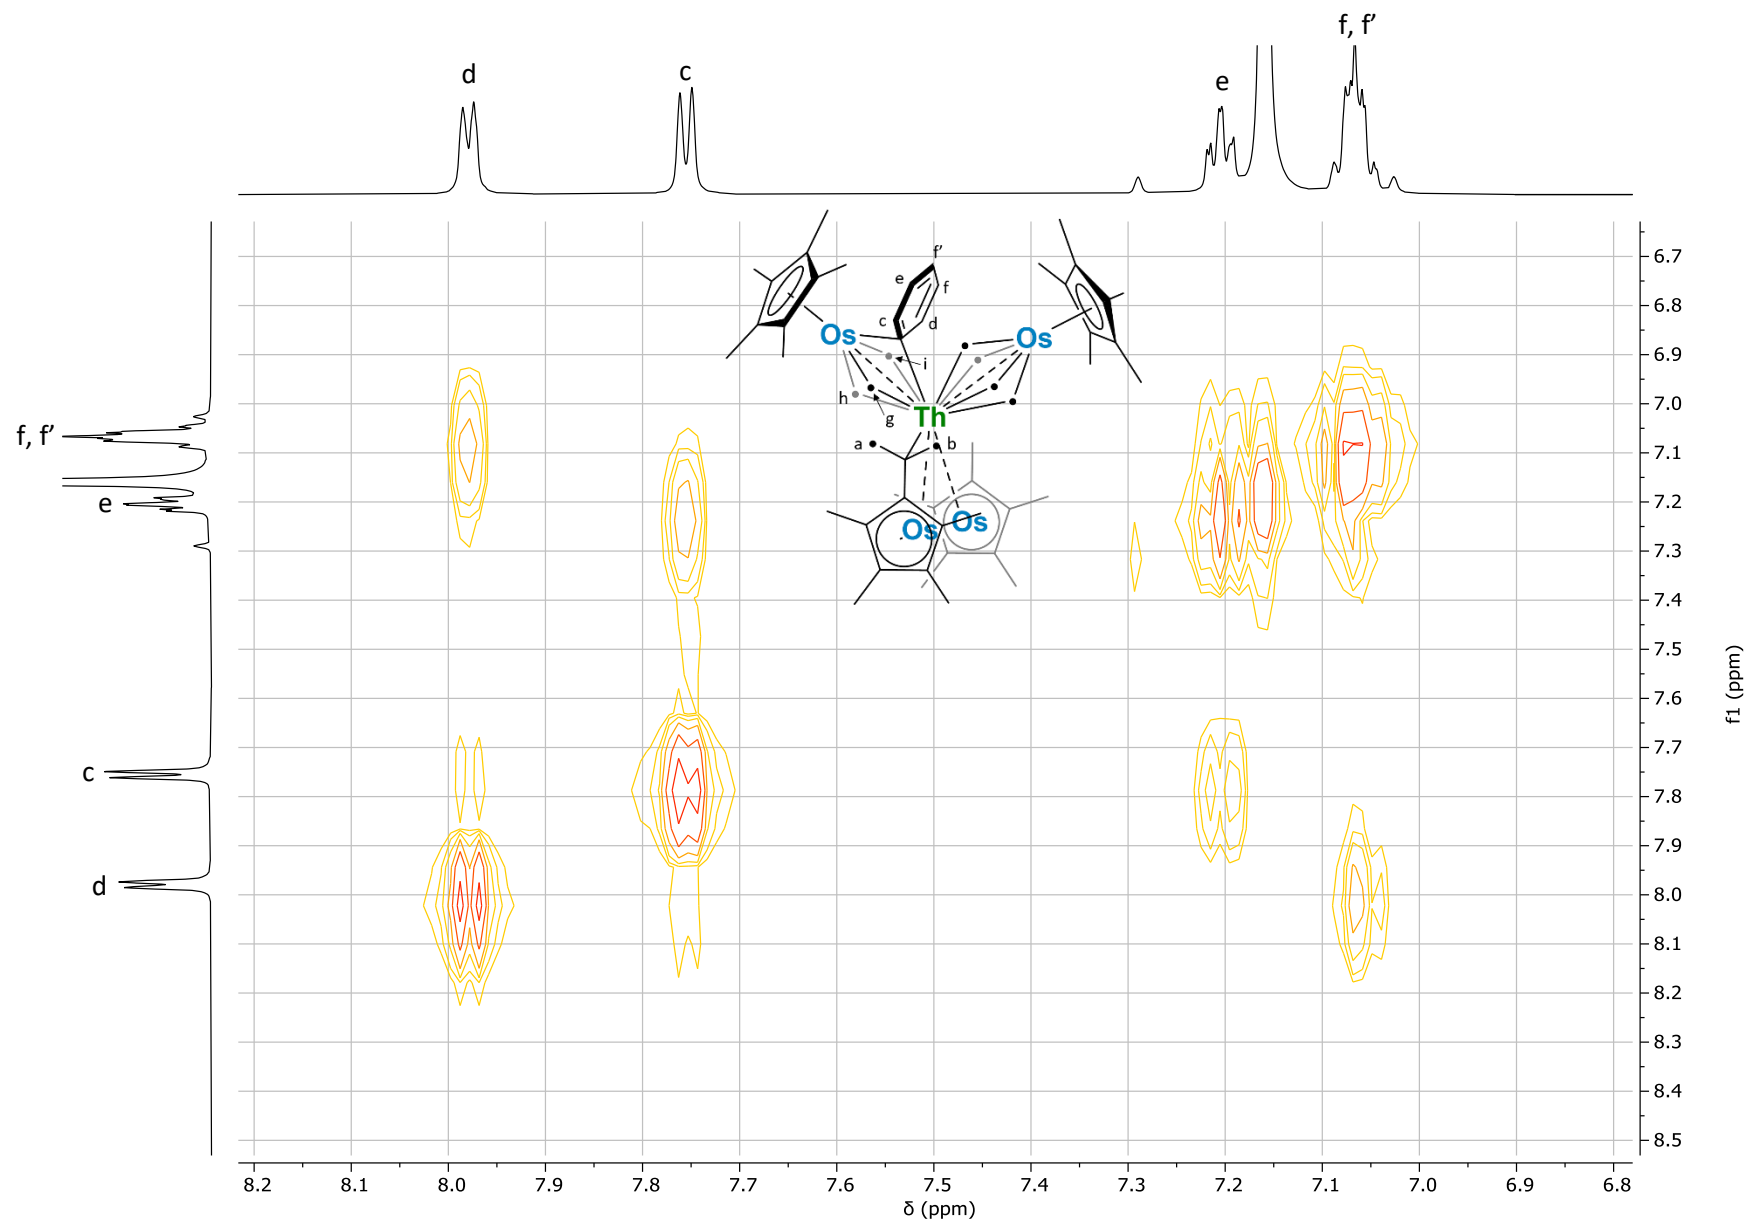

**Figure S25.**  $^1\text{H}$ - $^1\text{H}$  COSY NMR spectrum of crystallized 22:78 **3-Th/4-Th** at 298 K in  $\text{C}_6\text{D}_6$ , aromatic interactions.

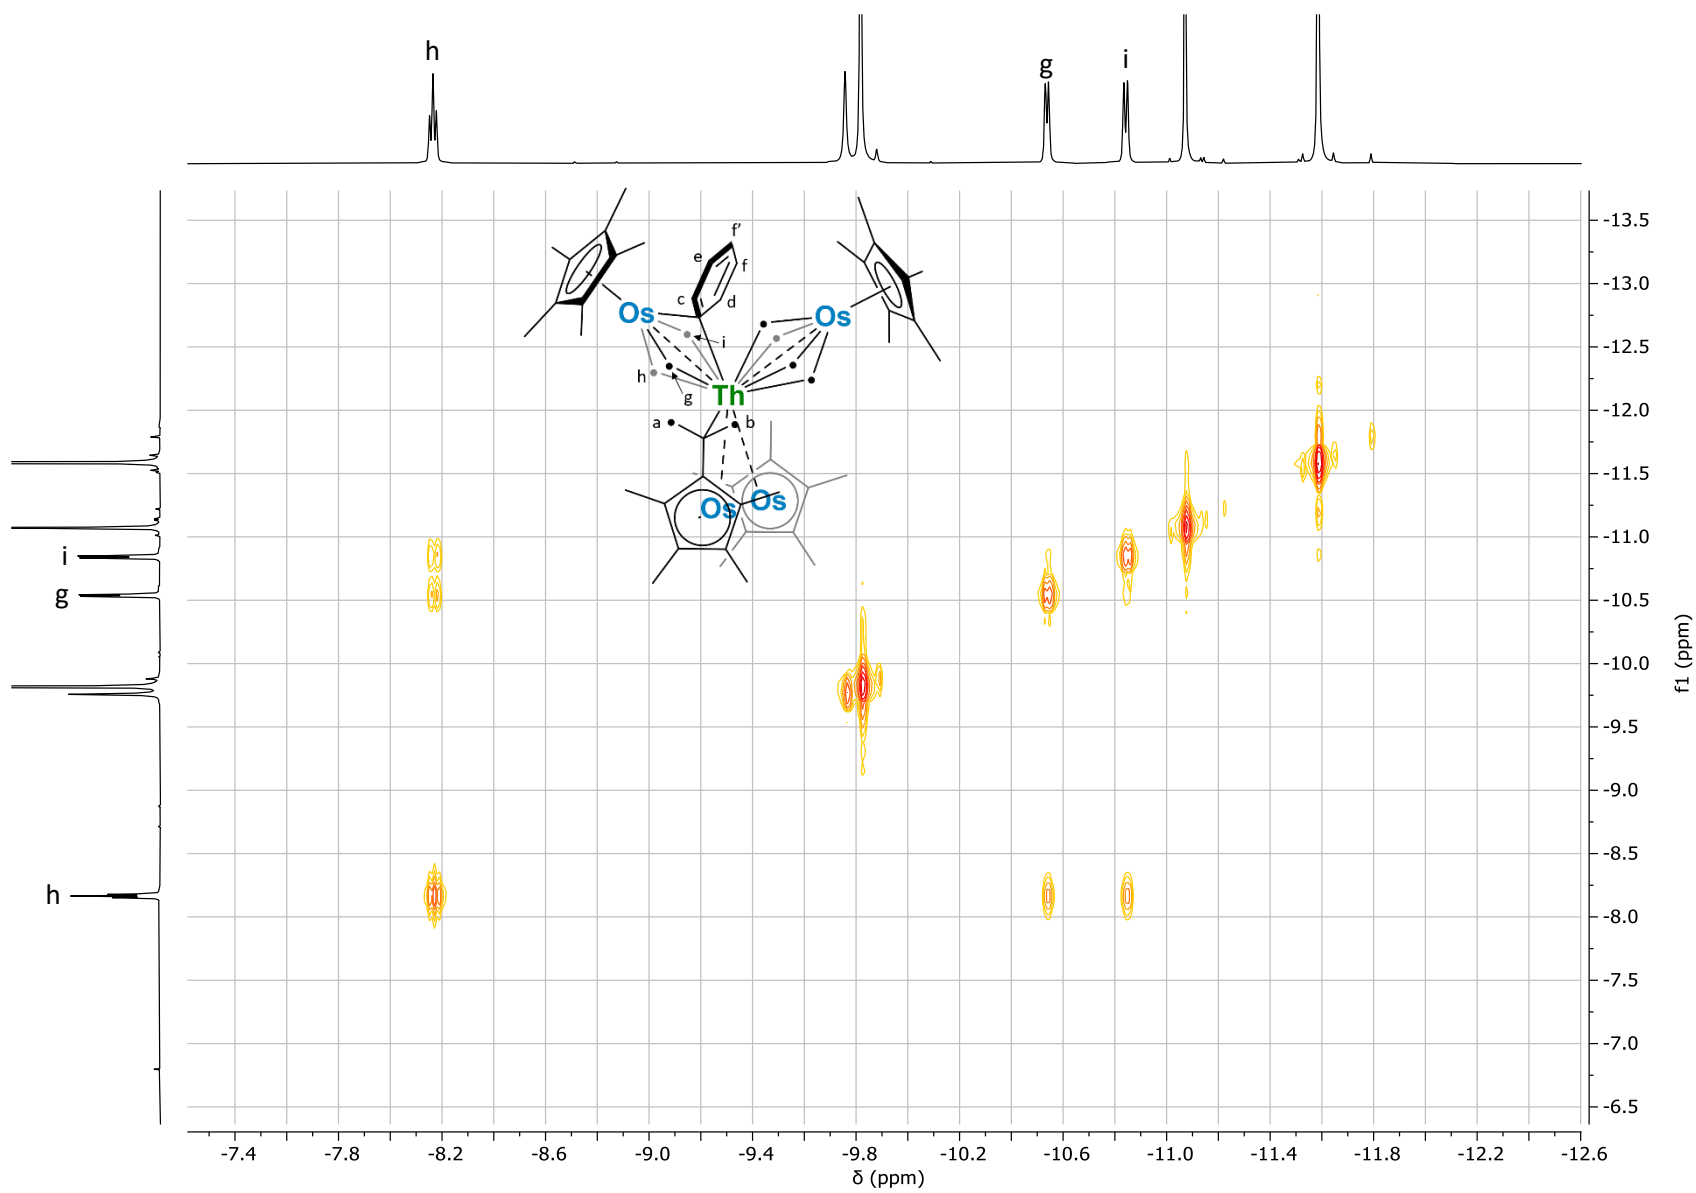

**Figure S26.**  $^1\text{H}$ - $^1\text{H}$  COSY NMR spectrum NMR of crystallized 22:78 **3-Th/4-Th** at 298 K in  $\text{C}_6\text{D}_6$ , hydride interactions.

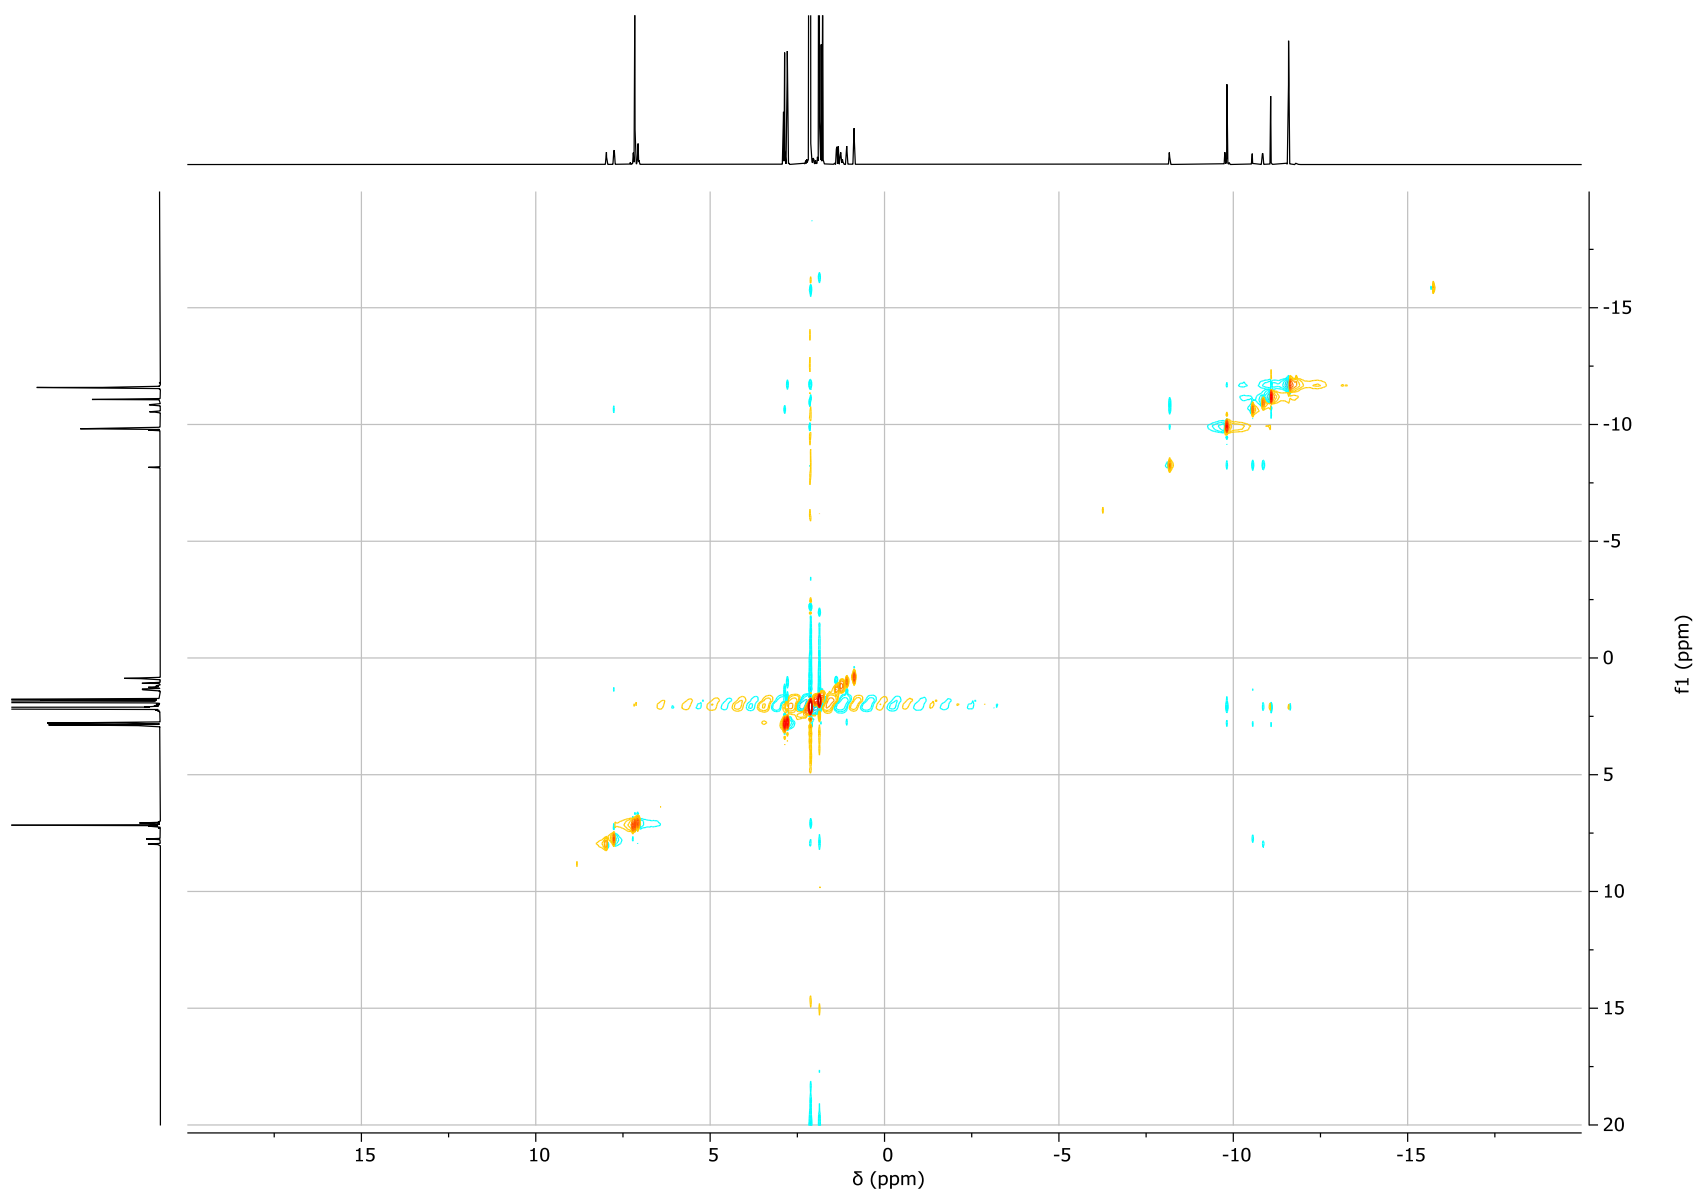

**Figure S27.** NOESY NMR spectrum of crystallized 22:78 **3-Th/4-Th** at 298 K in  $\text{C}_6\text{D}_6$ .

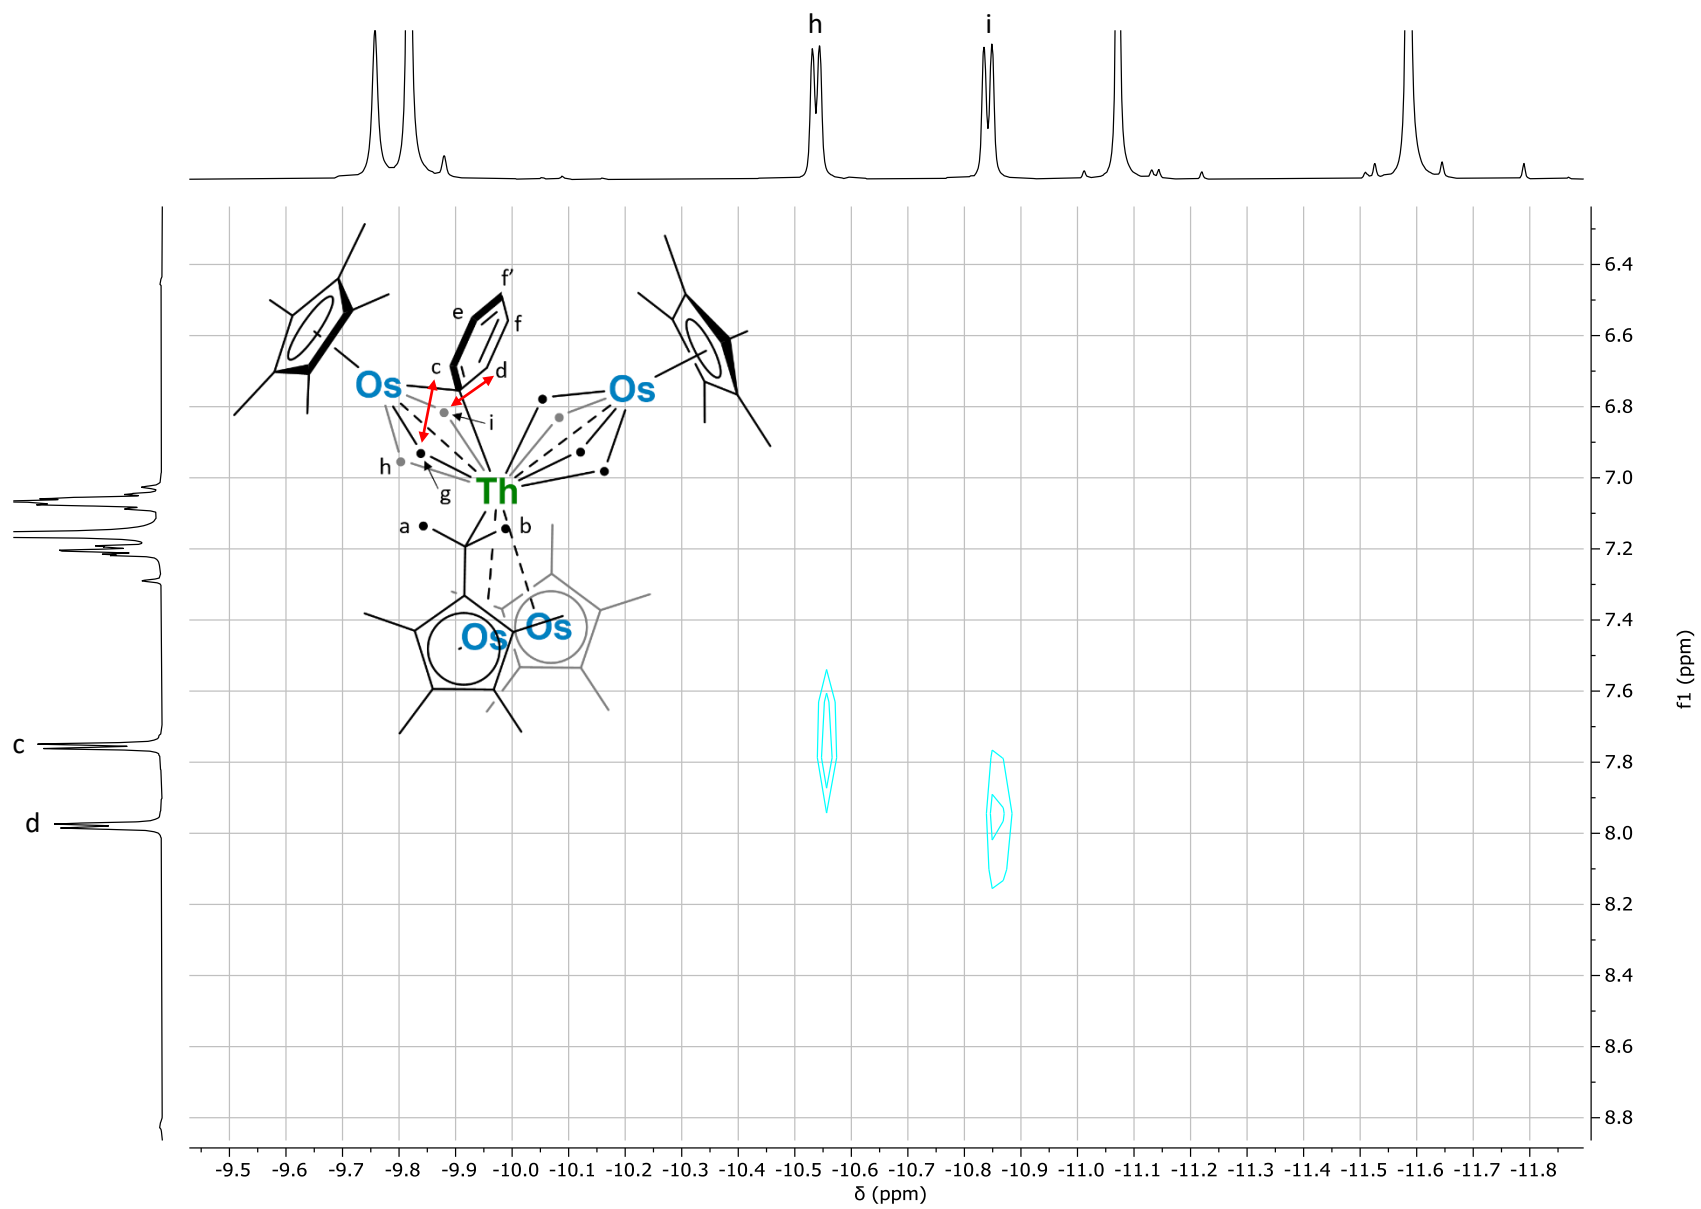

**Figure S28.** NOESY NMR spectrum of crystallized 22:78 **3-Th/4-Th** at 298 K in C<sub>6</sub>D<sub>6</sub>, aromatic proton/hydride interactions.

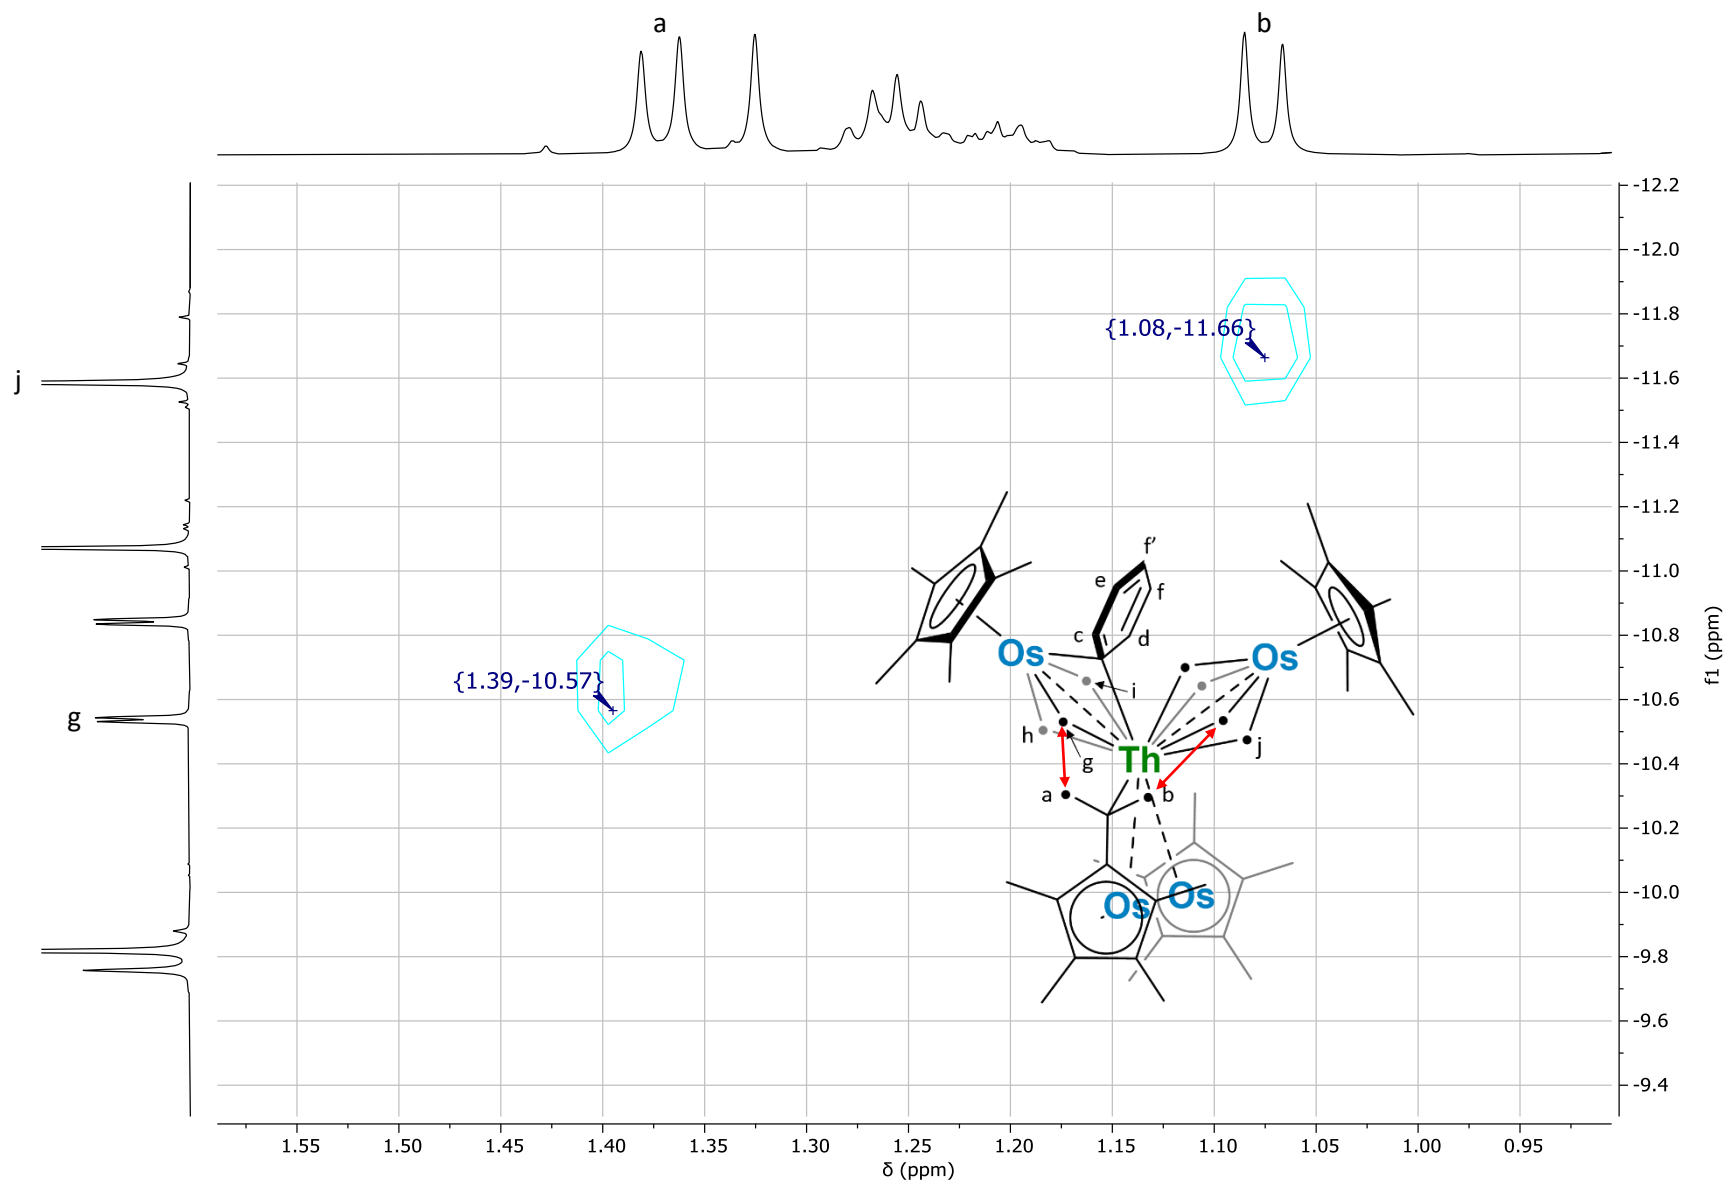

**Figure S29.** NOESY NMR spectrum of crystallized 22:78 **3-Th/4-Th** at 298 K in C<sub>6</sub>D<sub>6</sub>, methylene/hydride interactions.

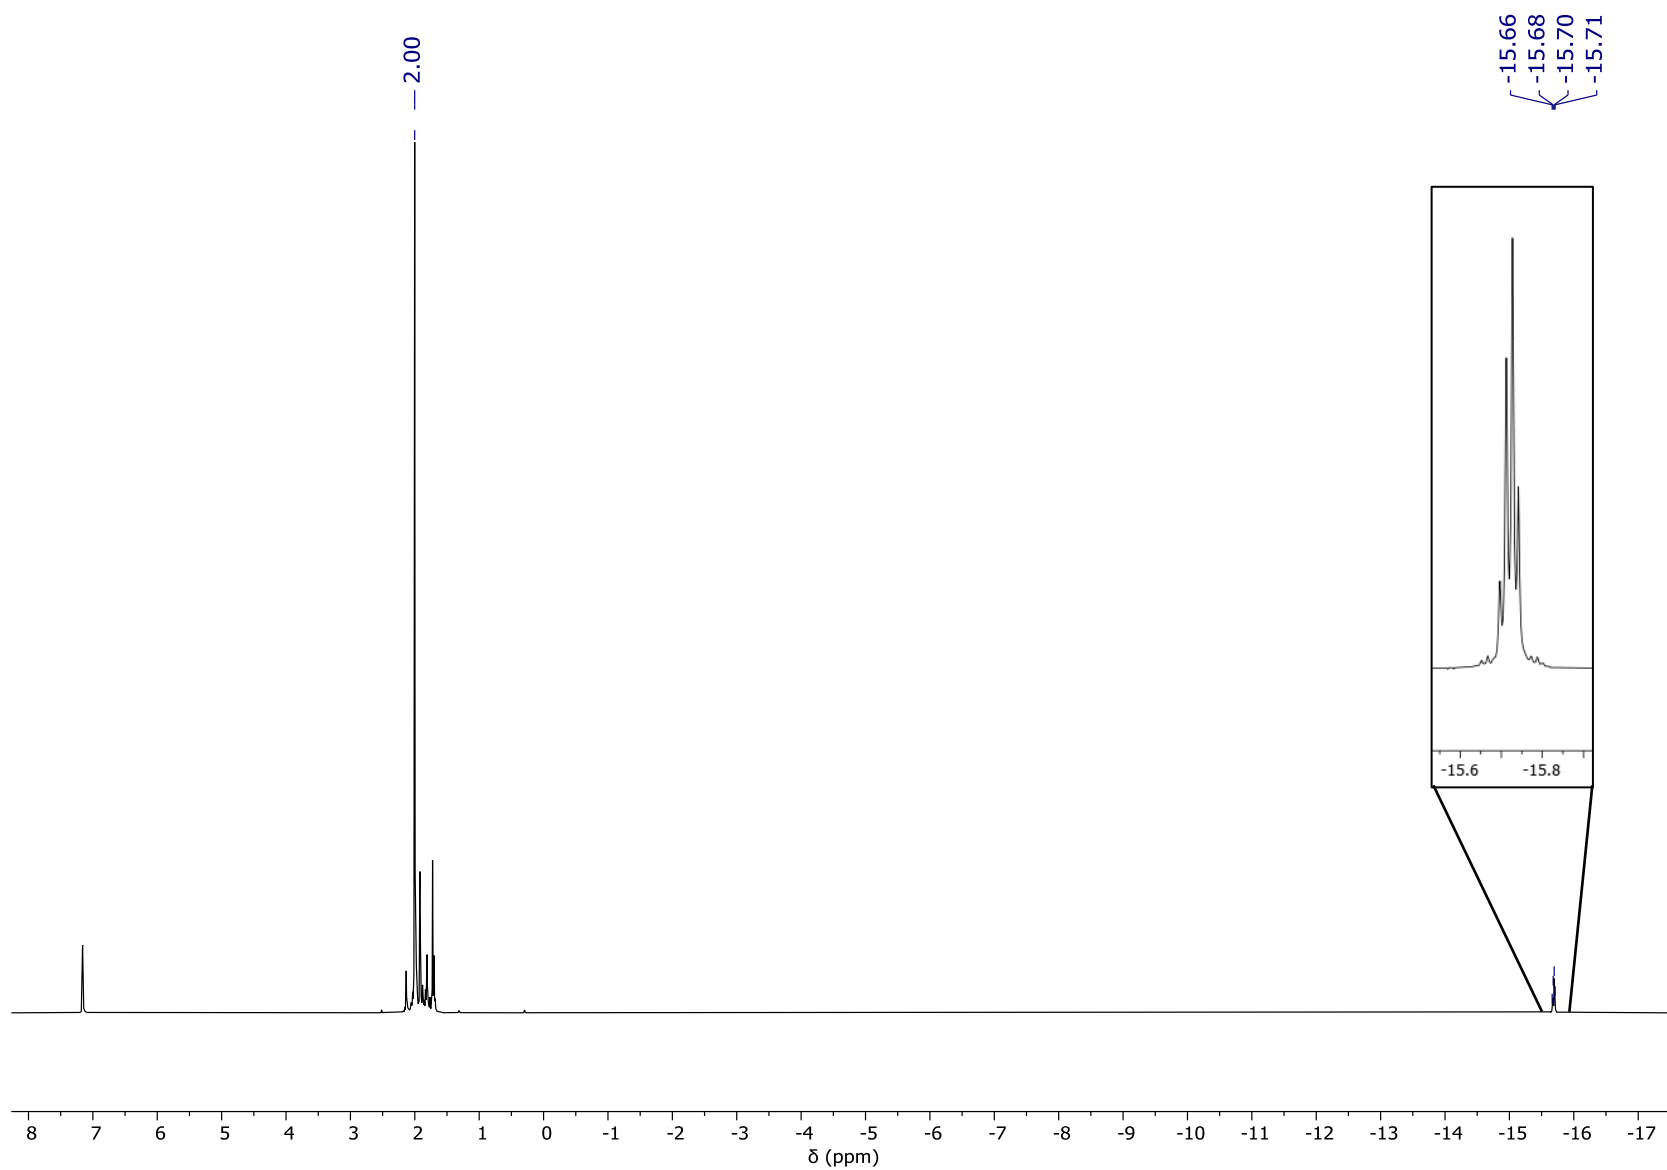

**Figure S30.** Crude  $^1\text{H}$  NMR spectrum of the photolysis of  $\text{Cp}^*\text{OsH}_5$  to form  $[\text{Cp}^*\text{OsX}_2]_2$  ( $\text{X} = \text{H}, \text{D}$ ) in  $\text{C}_6\text{D}_6$ , showing evidence of H/D exchange at the hydrides. Inset: zoomed in view of hydride signals.



### Diffusion Coefficients for **3-Th** and **4-Th**

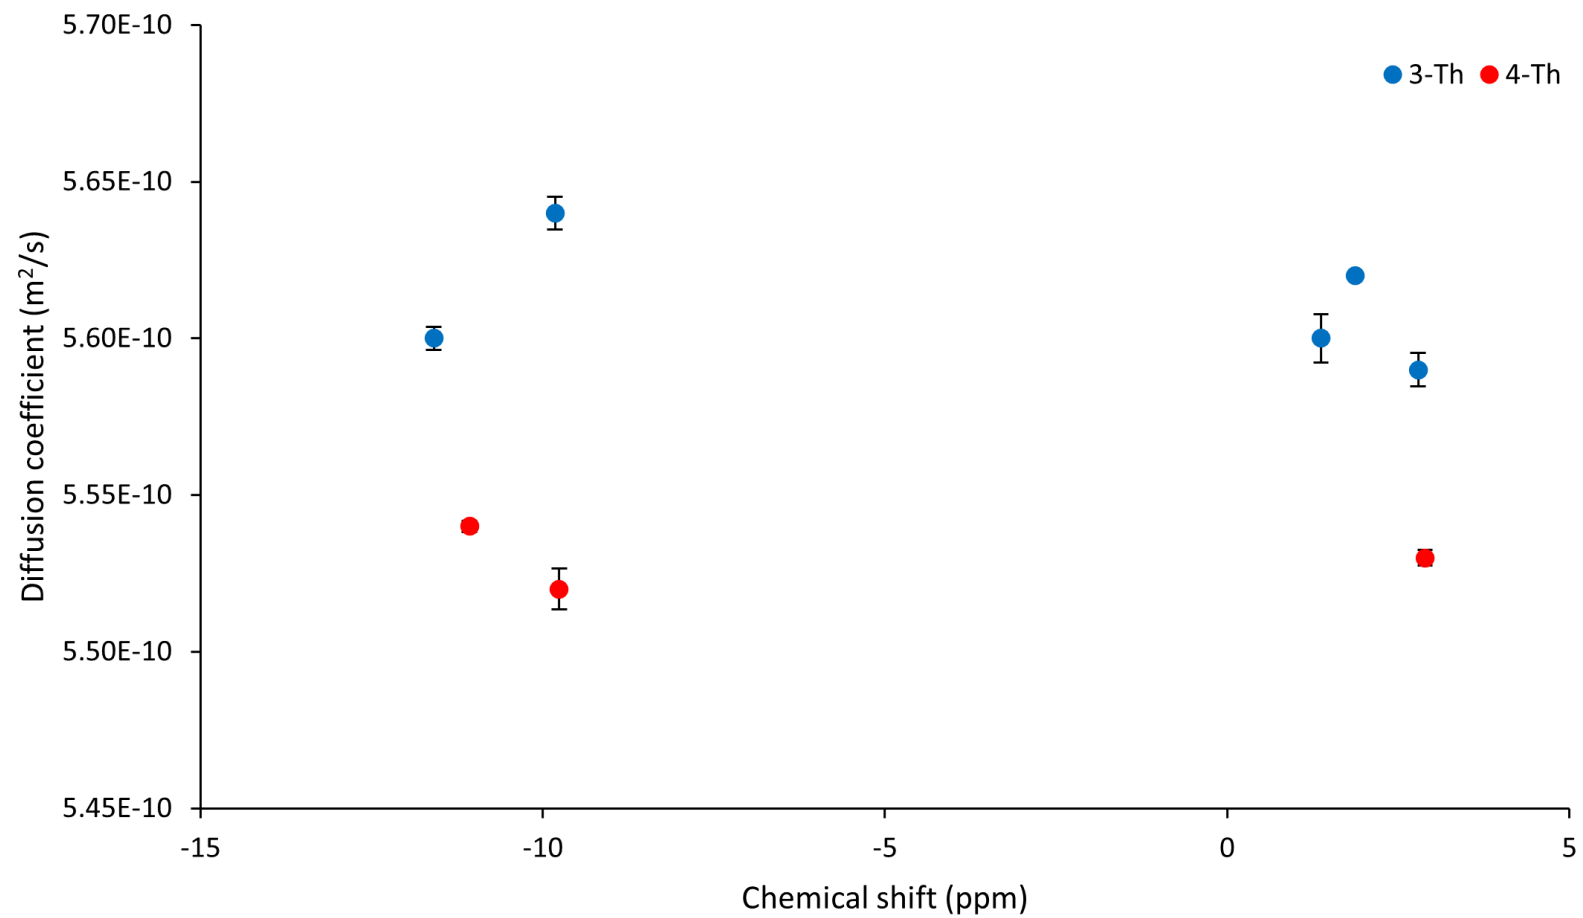

**Figure S31.** Diffusion coefficients calculated for <sup>1</sup>H NMR peaks from DOSY of a ~1:1 sample of **3-Th/4-Th**.

## X-ray crystallography details

In a dry nitrogen glovebox, samples of single crystals were coated in Paratone-N oil for transport to the Advanced Light Source (ALS) or CheXray. Crystals were mounted on a MiTeGen 10  $\mu\text{m}$  aperture Dual-Thickness MicroMount loop (ALS) or Kaptan loop (CheXray). X-ray diffraction data for **2-Th**, **2-U**, **3-U**, and **4-Th** were collected at the ALS, Lawrence Berkeley National Lab, Berkeley, CA, station 12.2.1 using a silicon monochromated beam of 17 keV ( $\lambda = 0.7288 \text{ \AA}$ ) synchrotron radiation. Data was collected at 100 K, with the crystals cooled by a stream of dry nitrogen. Bruker APEX3 software was used for the data collections, Bruker SAINT v8.37A or V8.38A software was used to conduct the cell refinement and data reduction procedures,<sup>6</sup> and absorption corrections were carried out by a multi-scan method utilizing the SADABS program.<sup>6</sup> X-ray diffraction data for **3-Th** were collected at CheXray, Berkeley, CA, using a Rigaku XtaLAB P200 equipped with a MicroMax-007 HF microfocus rotating anode and a Pilatus 200K hybrid pixel array detector. Data was collected using Mo  $K\alpha$  radiation ( $\lambda = 0.71073 \text{ \AA}$ ). All data collections were conducted at 100 K, with the crystals cooled by a stream of dry nitrogen. CrysAlis Pro was used for the data collections and data processing, including a multi-scan absorption correction applied using the SCALE3 ABSPACK scaling algorithm within CrysAlis Pro. Initial structure solutions were found using direct methods (SHELXT),<sup>7</sup> and refinements were carried out using SHELXL-2014,<sup>8</sup> as implemented by Olex2.<sup>9</sup> Thermal parameters for all non-hydrogen atoms were refined anisotropically. Hydrogen atoms were placed in calculated positions and refined isotropically. Thermal ellipsoid plots were made using Mercury.<sup>10</sup> The structures have been deposited to the Cambridge Crystallographic Data Centre (CCDC) with deposition numbers 2346841 (**2-Th**), 2346842 (**2-U**), 2346843 (**3-U**), 2346844 (**3-Th**), and 2346845 (**4-Th**).

| Compound                                    | <b>2-Th</b>                                        | <b>2-U</b>                                                    | <b>3-U</b>                                                    | <b>3-Th</b>                                                                         | <b>4-Th</b>                                                   |
|---------------------------------------------|----------------------------------------------------|---------------------------------------------------------------|---------------------------------------------------------------|-------------------------------------------------------------------------------------|---------------------------------------------------------------|
| Empirical formula*                          | C <sub>40</sub> H <sub>60</sub> Os <sub>4</sub> Th | C <sub>40</sub> H <sub>60</sub> Os <sub>4</sub> U             | C <sub>40</sub> H <sub>59</sub> Os <sub>4</sub> U             | C <sub>40</sub> H <sub>59</sub> Os <sub>4</sub> Th · C <sub>6</sub> H <sub>14</sub> | C <sub>46</sub> H <sub>64</sub> Os <sub>4</sub> Th            |
| Formula weight                              | 1533.72                                            | 1539.71                                                       | 1538.70                                                       | 1618.88                                                                             | 1609.81                                                       |
| Temperature/K                               | 100                                                | 100                                                           | 100                                                           | 100.00                                                                              | 100                                                           |
| Crystal system                              | monoclinic                                         | cubic                                                         | monoclinic                                                    | orthorhombic                                                                        | tetragonal                                                    |
| Space group                                 | P2 <sub>1</sub> /c                                 | Pa-3                                                          | C2/c                                                          | Pmn2 <sub>1</sub>                                                                   | P4 <sub>2</sub> /ncm                                          |
| a/Å                                         | 23.163(2)                                          | 21.395(2)                                                     | 40.875(4)                                                     | 18.6052(5)                                                                          | 13.7391(15)                                                   |
| b/Å                                         | 12.6413(11)                                        | 21.395(2)                                                     | 10.0269(10)                                                   | 9.9998(3)                                                                           | 13.7391(15)                                                   |
| c/Å                                         | 15.7810(13)                                        | 21.395(2)                                                     | 23.315(2)                                                     | 13.3830(4)                                                                          | 25.158(3)                                                     |
| α/°                                         | 90                                                 | 90                                                            | 90                                                            | 90                                                                                  | 90                                                            |
| β/°                                         | 91.796(3)                                          | 90                                                            | 113.731(4)                                                    | 90                                                                                  | 90                                                            |
| γ/°                                         | 90                                                 | 90                                                            | 90                                                            | 90                                                                                  | 90                                                            |
| Volume/Å <sup>3</sup>                       | 4618.6(7)                                          | 9793(3)                                                       | 8747.7(15)                                                    | 2489.88(12)                                                                         | 4748.8(12)                                                    |
| Z                                           | 4                                                  | 8                                                             | 8                                                             | 2                                                                                   | 4                                                             |
| ρ <sub>calc</sub> /cm <sup>3</sup>          | 2.206                                              | 2.089                                                         | 2.337                                                         | 2.159                                                                               | 2.252                                                         |
| μ/mm <sup>-1</sup>                          | 15.063                                             | 12.483                                                        | 13.975                                                        | 13.171                                                                              | 14.656                                                        |
| F(000)                                      | 2776.0                                             | 5568.0                                                        | 5560.0                                                        | 1486.0                                                                              | 2936.0                                                        |
| Crystal size/mm <sup>3</sup>                | 0.05 × 0.05 × 0.01                                 | 0.1 × 0.1 × 0.05                                              | 0.03 × 0.02 × 0.02                                            | 0.2 × 0.1 × 0.05                                                                    | 0.3 × 0.02 × 0.02                                             |
| Radiation                                   | synchrotron (λ = 0.7288)                           | synchrotron (λ = 0.7288)                                      | synchrotron (λ = 0.7288)                                      | Mo Kα (λ = 0.71073)                                                                 | synchrotron (λ = 0.7288)                                      |
| 2θ range for data collection/°              | 1.882 to 29.119                                    | 3.904 to 55.608                                               | 3.642 to 52.084                                               | 5.982 to 61.012                                                                     | 4.608 to 52.084                                               |
| Index ranges                                | -30 ≤ h ≤ 30, 0 ≤ k ≤ 16, 0 ≤ l ≤ 21               | -27 ≤ h ≤ 27, -27 ≤ k ≤ 27, -27 ≤ l ≤ 27                      | -49 ≤ h ≤ 49, -12 ≤ k ≤ 11, -28 ≤ l ≤ 28                      | -25 ≤ h ≤ 26, -14 ≤ k ≤ 13, -19 ≤ l ≤ 18                                            | -16 ≤ h ≤ 16, -16 ≤ k ≤ 16, -30 ≤ l ≤ 30                      |
| Reflections collected                       | 11258                                              | 125415                                                        | 52702                                                         | 27906                                                                               | 53451                                                         |
| Independent reflections                     | 11258                                              | 3605 [R <sub>int</sub> = 0.1087, R <sub>sigma</sub> = 0.0356] | 7991 [R <sub>int</sub> = 0.0502, R <sub>sigma</sub> = 0.0335] | 7260 [R <sub>int</sub> = 0.0340, R <sub>sigma</sub> = 0.0322]                       | 2317 [R <sub>int</sub> = 0.1416, R <sub>sigma</sub> = 0.0530] |
| Data/restraints/parameters                  | 11258/206/427                                      | 3605/75/206                                                   | 7991/186/532                                                  | 7260/31/279                                                                         | 2317/51/177                                                   |
| Goodness-of-fit on F <sup>2</sup>           | 1.041                                              | 1.109                                                         | 1.069                                                         | 1.045                                                                               | 1.214                                                         |
| Final R indexes [I ≥ 2σ (I)]                | R <sub>1</sub> = 0.0387, wR <sub>2</sub> = 0.0801  | R <sub>1</sub> = 0.0342, wR <sub>2</sub> = 0.0965             | R <sub>1</sub> = 0.0314, wR <sub>2</sub> = 0.0670             | R <sub>1</sub> = 0.0216, wR <sub>2</sub> = 0.0463                                   | R <sub>1</sub> = 0.0445, wR <sub>2</sub> = 0.1071             |
| Final R indexes [all data]                  | R <sub>1</sub> = 0.0521, wR <sub>2</sub> = 0.0862  | R <sub>1</sub> = 0.0372, wR <sub>2</sub> = 0.0986             | R <sub>1</sub> = 0.0397, wR <sub>2</sub> = 0.0701             | R <sub>1</sub> = 0.0247, wR <sub>2</sub> = 0.0470                                   | R <sub>1</sub> = 0.0510, wR <sub>2</sub> = 0.1101             |
| Largest diff. peak/hole / e Å <sup>-3</sup> | 2.77/-2.36                                         | 1.35/-1.91                                                    | 1.90/-2.54                                                    | 2.13/-1.14                                                                          | 1.08/-1.37                                                    |
| CSD entry                                   | 2346841                                            | 2346842                                                       | 2346843                                                       | 2346844                                                                             | 2346845                                                       |

**Table S1.** Crystal data for complexes **2-Th**, **2-U**, **3-U**, **3-Th**, and **4-Th**. \*Hydrides are not observed, and are therefore not included in the empirical formulas.

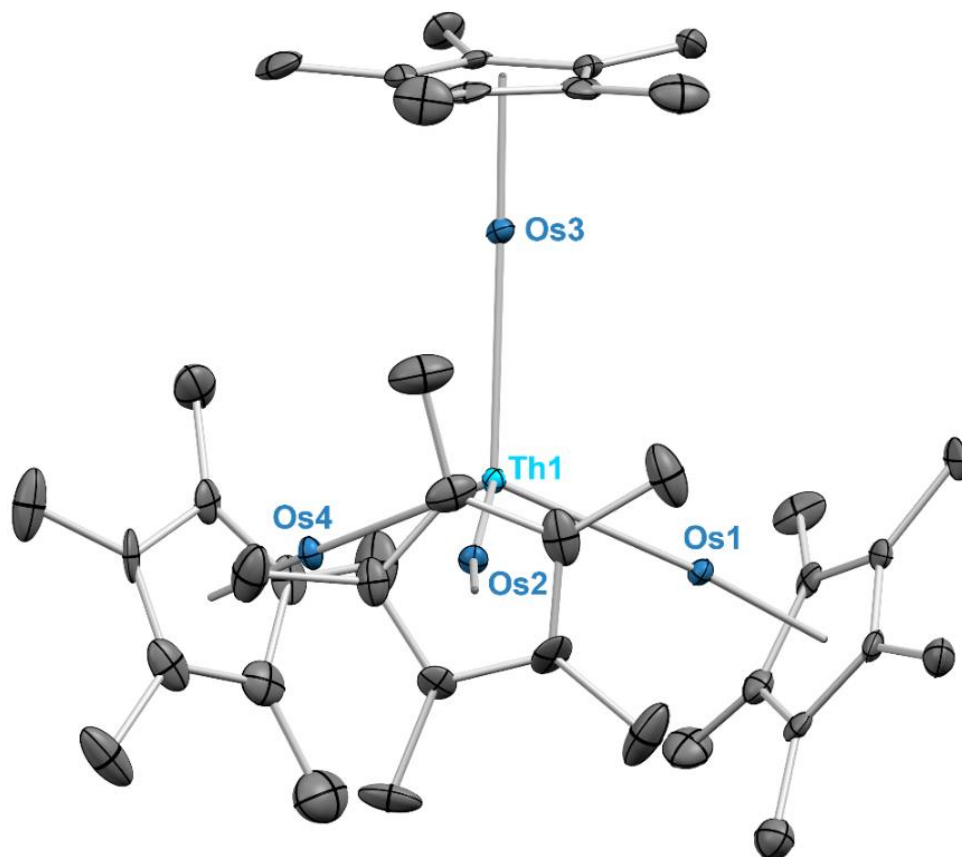

**Figure S32.** ORTEP diagram for **2-Th**, with ellipsoids drawn at the 50% probability level. Hydrogen atoms have been omitted for clarity. Selected bond distances (Å) and angles (°): Th1–Os1 3.0215(7), Th1–Os2 3.0379(6), Th1–Os3 3.0183(6), Th1–Os4 3.0288(7), Th1–Os1–Cp\*<sub>centroid</sub> 175.81(2), Th1–Os2–Cp\*<sub>centroid</sub> 171.10(2), Th1–Os3–Cp\*<sub>centroid</sub> 176.92(3), Th1–Os4–Cp\*<sub>centroid</sub> 171.88(3), Os1–Th1–Os4 103.291(17), Os2–Th1–Os4 115.805(16).

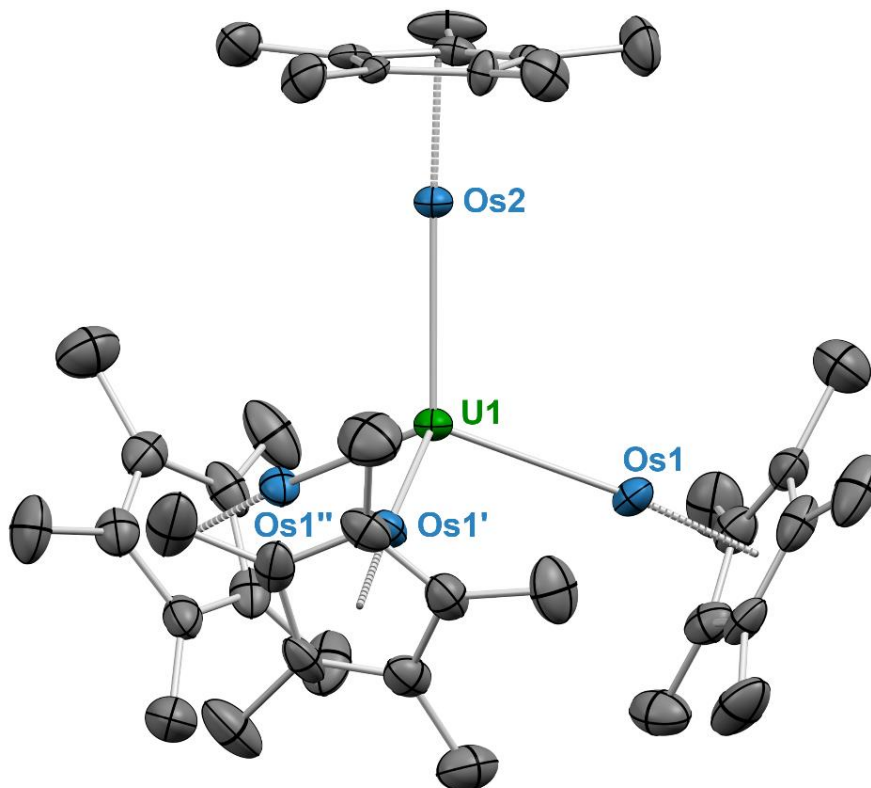

**Figure S33.** ORTEP diagram for **2-U**, with ellipsoids drawn at the 50% probability level. Hydrogen atoms have been omitted for clarity. Selected bond distances (Å) and angles (°): U1–Os1 2.9501(7), U1–Os2 2.9490(6), U1–Os1–Cp\*<sub>centroid</sub> 175.30(2), U1–Os2–Cp\*<sub>centroid</sub> 176.40(2), Os1–U1–Os1' 107.900(9), Os1–U1–Os2 110.998(9).

## Computational details

All DFT calculations were carried out with the Gaussian 09 suite of programs.<sup>11</sup> Geometries were fully optimized in gas phase without symmetry constraints, employing the B3PW91 functional.<sup>12,13</sup> The nature of the extrema was verified by analytical frequency calculations. The calculation of electronic energies and enthalpies of the extrema of the potential energy surface (minima and transition states) were performed at the same level of theory as the geometry optimizations. IRC calculations were performed to confirm the connections of the optimized transition states. Uranium, thorium and osmium atoms were treated with a small core effective core potential (60 MWB), associated with its adapted basis set<sup>14–16</sup> augmented, for osmium atoms, with a polarization function ( $\zeta_f = 0.886$ ).<sup>17</sup> For the other elements (H and C), Pople's double- $\zeta$  basis set 6-31G(d,p) was used.<sup>18–20</sup> Dispersion corrections were treated with the D3 version of Grimme's dispersion with Becke-Johnson damping.<sup>21</sup> The electronic charges (at the DFT level) were computed using the natural population analysis (NPA) technique.<sup>22</sup>

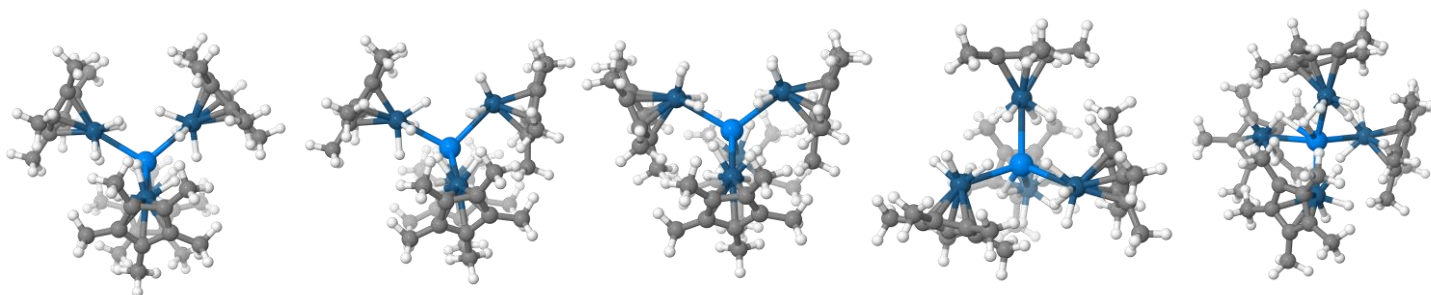

| <b>2-U</b>             | Linear  |         |         | 1 - Bent |         |         | 2 - Bent |         |         | 3 - Bent |         |         | 4 - Bent |         |         |
|------------------------|---------|---------|---------|----------|---------|---------|----------|---------|---------|----------|---------|---------|----------|---------|---------|
| Spin Multiplicity      | singlet | triplet | quintet | singlet  | triplet | quintet | singlet  | triplet | quintet | singlet  | triplet | quintet | singlet  | triplet | quintet |
| $\Delta rH$ (kcal/mol) | 25.0    | 0.0     | –       | 26.1     | 1.5     | 35.7    | 30.7     | 4.1     | 39.0    | –        | 9.9     | –       | 58.6     | 17.5    | –       |
| $\Delta rG$ (kcal/mol) | 26.7    | 0.0     | –       | 32.5     | 5.9     | 40.4    | 39.7     | 12.7    | 44.5    | –        | 17.9    | –       | 66.8     | 27.3    | –       |

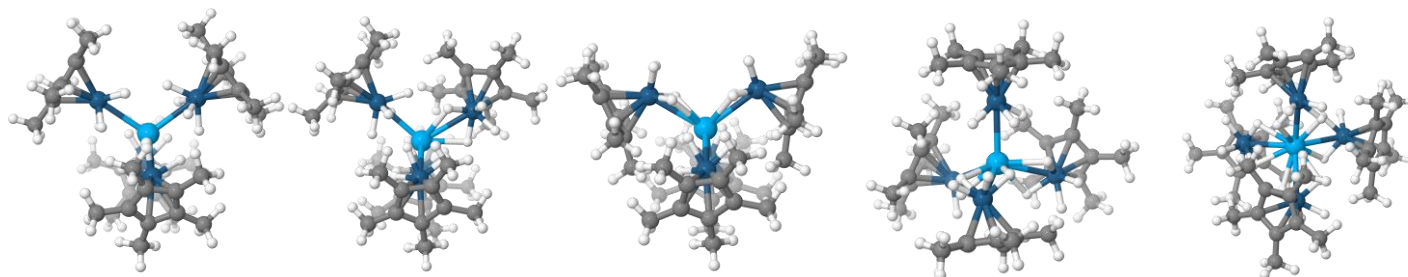

| <b>2-Th</b>            | Linear  |         | 1 - Bent |         | 2 - Bent |         | 3 - Bent |         | 4 - Bent |         |
|------------------------|---------|---------|----------|---------|----------|---------|----------|---------|----------|---------|
| Spin Multiplicity      | singlet | triplet | singlet  | triplet | singlet  | triplet | singlet  | triplet | singlet  | triplet |
| $\Delta rH$ (kcal/mol) | 0.0     | 269.7   | 1.4      | 57.7    | 5.8      | 58.4    | 11.7     | 63.6    | 18.7     | –       |
| $\Delta rG$ (kcal/mol) | 0.0     | 273.7   | 6.3      | 61.0    | 15.5     | 65.9    | 20.5     | 73.43   | 30.5     | –       |

**Table S2.** Relative energies, for **2-U** and **2-Th**, as a function of the number of bent Cp\* groups and spin multiplicity

|                                 | <b>2-U</b>                              | <b>2-Th</b>                             |
|---------------------------------|-----------------------------------------|-----------------------------------------|
|                                 | Linear (triplet)                        | Linear (singlet)                        |
| Os-H distance (Å)               | [1.628 – 1.652] ( $\mu$ -H)             | [1.630 – 1.648] ( $\mu$ -H)             |
| U/Th-H distance (Å)             | [2.444 – 2.595]                         | [2.536 – 2.601]                         |
| U/Th-Os distance (Å)            | 2.911, 2.912, 2.913, 2.913              | 2.977, 2.977, 2.977, 2.978              |
| U/Th-C(Cp*) distance (Å)        | [4.858 – 5.037]                         | [4.945 – 5.089]                         |
| U/Th-C(Me-Cp*) distance (Å)     | [5.476 – 5.708]                         | [5.564 – 5.749]                         |
| Os-C(Cp*) distance (Å)          | [2.187 – 2.300]                         | [2.187 – 2.306]                         |
| Os-U/Th-Os angle (°)            | [107.1 – 111.3]                         | [108.3 – 110.1]                         |
| Os-U/Th-Cp (centroid) angle (°) | 177.1 ; 177.8 ; 179.1 ; 179.2           | 178.9 ; 179.8 ; 179.2, 179.3            |
| Os-H ( $\text{cm}^{-1}$ )       | [2056 – 1947], [939 – 818], [675 – 653] | [2051 – 1963], [947 – 838], [678 – 667] |

**Table S3.** Tabulated calculated bond distances/angles and Os-H frequencies for **2-U** and **2-Th**.

|                        | <b>2-U (triplet)</b>                             | <b>2-Th (singlet)</b>                                                                                                                                                |
|------------------------|--------------------------------------------------|----------------------------------------------------------------------------------------------------------------------------------------------------------------------|
|                        | Wiberg Bond Indexes (WBI)                        |                                                                                                                                                                      |
| Os – H                 | [0.57 – 0.60]                                    | [0.60]                                                                                                                                                               |
| U/Th – ( $\mu$ -H)     | [0.18 – 0.24]                                    | [0.19 – 0.21]                                                                                                                                                        |
| U/Th – Os              | [0.81 - 0.83]                                    | [0.72 - 0.73]                                                                                                                                                        |
| U/Th – C (Cp*)         | [0.02 - 0.03]                                    | [0.02 - 0.03]                                                                                                                                                        |
| 2nd Order NBO Analysis | LP C (Cp*) $\rightarrow$ LP* U: [4 – 5] kcal/mol | BD C (Cp*) – C (Cp*) $\rightarrow$ LP*: 3 kcal/mol<br>BD C (Me-Cp*) – H $\rightarrow$ LP* U: [8 - 12] kcal/mol<br>LP C (Cp*) $\rightarrow$ LP* U: [42 – 48] kcal/mol |
|                        | Natural Charges                                  |                                                                                                                                                                      |
| Os Natural Charges     | -0.95 - -0.96                                    | -0.98                                                                                                                                                                |
| U/Th Natural Charges   | -0.36                                            | 0.04                                                                                                                                                                 |

**Table S4.** Wiberg Bond Indexes and Natural Charges for **2-U** and **2-Th**.



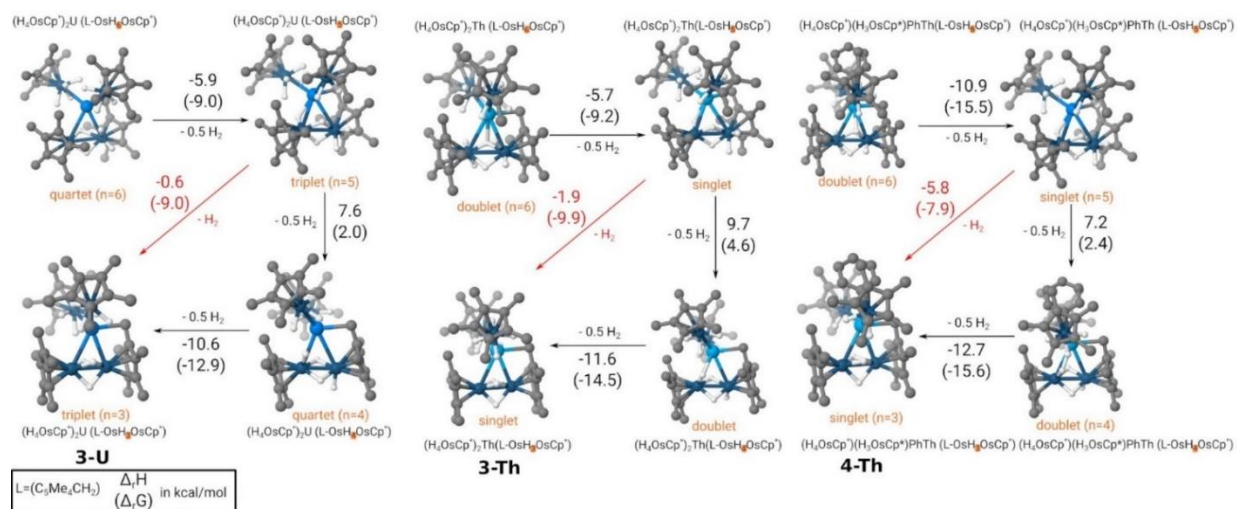

**Figure S34.** Determination of the number of hydrogen atoms on complexes **3-U**, **3-Th** and **4-Th**.

| (H <sub>4</sub> OsCp*) <sub>2</sub> U<br>((C <sub>5</sub> Me <sub>4</sub> CH <sub>2</sub> )Os<br>H <sub>n</sub> OsCp*) | n = 2             |         |         | n = 3  |         |         | n = 4   |         |         | n = 5  |         |         | n = 6   |         |         |
|------------------------------------------------------------------------------------------------------------------------|-------------------|---------|---------|--------|---------|---------|---------|---------|---------|--------|---------|---------|---------|---------|---------|
|                                                                                                                        | Spin Multiplicity | doublet | quartet | sextet | singlet | triplet | quintet | doublet | quartet | sextet | singlet | triplet | quintet | doublet | quartet |
| Δ <sub>r</sub> H (kcal/mol)                                                                                            | 1.1               | 0.0     | 34.3    | 25.6   | 0.0     | 23.3    | 2.7     | 0.0     | 29.3    | 32.6   | 0.0     | 11.1    | 1.2     | 0.0     | 30.3    |
| Δ <sub>r</sub> G (kcal/mol)                                                                                            | 0.6               | 0.0     | 32.6    | 26.8   | 0.0     | 22.9    | 3.6     | 0.0     | 27.8    | 32.0   | 0.0     | 9.6     | 1.6     | 0.0     | 26.8    |

| (PhH <sub>3</sub> OsCp*)(H<br><sub>4</sub> OsCp*)Th<br>((C <sub>5</sub> Me <sub>4</sub> CH <sub>2</sub> )Os<br>H <sub>n</sub> OsCp*) | n = 0             |         | n = 1   |         | n = 2   |         | n = 3   |         | n = 4   |         | n = 5   |         | n = 6   |         |
|--------------------------------------------------------------------------------------------------------------------------------------|-------------------|---------|---------|---------|---------|---------|---------|---------|---------|---------|---------|---------|---------|---------|
|                                                                                                                                      | Spin Multiplicity | doublet | quartet | singlet | triplet | doublet | quartet | singlet | triplet | doublet | quartet | singlet | triplet | doublet |
| Δ <sub>r</sub> H (kcal/mol)                                                                                                          | 0.0               | 44.4    | 0.0     | 36.5    | 0.0     | 46.8    | 0.0     | 42.4    | 0.0     | -       | 0.0     | -       | 0.0     | -       |
| Δ <sub>r</sub> G (kcal/mol)                                                                                                          | 0.0               | 40.8    | 0.0     | 34.6    | 0.0     | 45.2    | 0.0     | 36.6    | 0.0     | -       | 0.0     | -       | 0.0     | -       |

**Table S5.** Relative energies, for **3-U** and **4-Th**, as a function of the number of hydrogens atoms and of the spin multiplicity.

|                                                                                                                | 3-U (triplet)                                                                                                                                                                                                                                                                                                                                                                                                         | 3-Th (singlet)                                                                                                                                                                                                                                                                                                                                                                                               | 4-Th (singlet)                                                                                                                                                                                                                                                                                                                                                                                                                     |
|----------------------------------------------------------------------------------------------------------------|-----------------------------------------------------------------------------------------------------------------------------------------------------------------------------------------------------------------------------------------------------------------------------------------------------------------------------------------------------------------------------------------------------------------------|--------------------------------------------------------------------------------------------------------------------------------------------------------------------------------------------------------------------------------------------------------------------------------------------------------------------------------------------------------------------------------------------------------------|------------------------------------------------------------------------------------------------------------------------------------------------------------------------------------------------------------------------------------------------------------------------------------------------------------------------------------------------------------------------------------------------------------------------------------|
| Os – H distance (Å)                                                                                            | [1.630 – 1.649] (H <sub>4</sub> OsCp <sup>*</sup> ) <sub>2</sub><br>[1.794 – 1.838]<br>((C <sub>5</sub> Me <sub>4</sub> CH <sub>2</sub> )OsH <sub>3</sub> OsCp <sup>*</sup> )                                                                                                                                                                                                                                         | [1.632 – 1.647] (H <sub>4</sub> OsCp <sup>*</sup> ) <sub>2</sub><br>[1.798 – 1.834]<br>((C <sub>5</sub> Me <sub>4</sub> CH <sub>2</sub> )OsH <sub>3</sub> OsCp <sup>*</sup> )                                                                                                                                                                                                                                | [1.625 – 1.642] (H <sub>4</sub> OsCp <sup>*</sup> ) <sub>2</sub><br>[1.797 – 1.834]<br>((C <sub>5</sub> Me <sub>4</sub> CH <sub>2</sub> )OsH <sub>3</sub> OsCp <sup>*</sup> )                                                                                                                                                                                                                                                      |
| Os–C(Ph) distance (Å)                                                                                          | -                                                                                                                                                                                                                                                                                                                                                                                                                     | -                                                                                                                                                                                                                                                                                                                                                                                                            | 2.113                                                                                                                                                                                                                                                                                                                                                                                                                              |
| U/Th–H distance (Å)                                                                                            | [2.464 – 2.543] (H <sub>4</sub> OsCp <sup>*</sup> ) <sub>2</sub><br>[2.662, 2.667, 4.065]<br>((C <sub>5</sub> Me <sub>4</sub> CH <sub>2</sub> )OsH <sub>3</sub> OsCp <sup>*</sup> )                                                                                                                                                                                                                                   | [2.542 – 2.630] (H <sub>4</sub> OsCp <sup>*</sup> ) <sub>2</sub><br>[2.738, 2.734, 4.127]<br>((C <sub>5</sub> Me <sub>4</sub> CH <sub>2</sub> )OsH <sub>3</sub> OsCp <sup>*</sup> )                                                                                                                                                                                                                          | [2.518 – 2.644] (H <sub>4</sub> OsCp <sup>*</sup> ) <sub>2</sub><br>[2.737, 2.742, 4.132]<br>((C <sub>5</sub> Me <sub>4</sub> CH <sub>2</sub> )OsH <sub>3</sub> OsCp <sup>*</sup> )                                                                                                                                                                                                                                                |
| U/Th–C(Ph) distance (Å)                                                                                        | -                                                                                                                                                                                                                                                                                                                                                                                                                     | -                                                                                                                                                                                                                                                                                                                                                                                                            | 2.856                                                                                                                                                                                                                                                                                                                                                                                                                              |
| U/Th–Os distance (Å)                                                                                           | [2.918, 2.922] (H <sub>4</sub> OsCp <sup>*</sup> ) <sub>2</sub><br>[2.856, 3.150]<br>((C <sub>5</sub> Me <sub>4</sub> CH <sub>2</sub> )OsH <sub>3</sub> OsCp <sup>*</sup> )                                                                                                                                                                                                                                           | [2.984, 2.987] (H <sub>4</sub> OsCp <sup>*</sup> ) <sub>2</sub><br>[2.941, 3.178]<br>((C <sub>5</sub> Me <sub>4</sub> CH <sub>2</sub> )OsH <sub>3</sub> OsCp <sup>*</sup> )                                                                                                                                                                                                                                  | [3.040, 2.988] (H <sub>4</sub> OsCp <sup>*</sup> ) <sub>2</sub><br>[2.948, 3.179]<br>((C <sub>5</sub> Me <sub>4</sub> CH <sub>2</sub> )OsH <sub>3</sub> OsCp <sup>*</sup> )                                                                                                                                                                                                                                                        |
| Os–Os distance (Å)<br>((C <sub>5</sub> Me <sub>4</sub> CH <sub>2</sub> )OsH <sub>3</sub> OsCp <sup>*</sup> )   | 2.474                                                                                                                                                                                                                                                                                                                                                                                                                 | 2.475                                                                                                                                                                                                                                                                                                                                                                                                        | 2.472                                                                                                                                                                                                                                                                                                                                                                                                                              |
| Os–C(Cp <sup>*</sup> ) distance (Å)                                                                            | [2.188 – 2.301] (H <sub>4</sub> OsCp <sup>*</sup> ) <sub>2</sub><br>[2.175 – 2.241]<br>((C <sub>5</sub> Me <sub>4</sub> CH <sub>2</sub> )OsH <sub>3</sub> OsCp <sup>*</sup> )                                                                                                                                                                                                                                         | [2.193 – 2.309] (H <sub>4</sub> OsCp <sup>*</sup> ) <sub>2</sub><br>[2.175 – 2.248]<br>((C <sub>5</sub> Me <sub>4</sub> CH <sub>2</sub> )OsH <sub>3</sub> OsCp <sup>*</sup> )                                                                                                                                                                                                                                | [2.183 – 2.318] (H <sub>4</sub> OsCp <sup>*</sup> ) <sub>2</sub><br>[2.178 – 2.243]<br>((C <sub>5</sub> Me <sub>4</sub> CH <sub>2</sub> )OsH <sub>3</sub> OsCp <sup>*</sup> )                                                                                                                                                                                                                                                      |
| Os–C(Me–Cp <sup>*</sup> ) distance (Å)                                                                         | [3.306 – 3.412] (H <sub>4</sub> OsCp <sup>*</sup> ) <sub>2</sub><br>[3.280 – 3.446]<br>((C <sub>5</sub> Me <sub>4</sub> CH <sub>2</sub> )OsH <sub>3</sub> OsCp <sup>*</sup> )                                                                                                                                                                                                                                         | [3.313 – 3.421] (H <sub>4</sub> OsCp <sup>*</sup> ) <sub>2</sub><br>[3.281 – 3.437]<br>((C <sub>5</sub> Me <sub>4</sub> CH <sub>2</sub> )OsH <sub>3</sub> OsCp <sup>*</sup> )                                                                                                                                                                                                                                | [3.305 – 3.431] (H <sub>4</sub> OsCp <sup>*</sup> ) <sub>2</sub><br>[3.284 – 3.405]<br>((C <sub>5</sub> Me <sub>4</sub> CH <sub>2</sub> )OsH <sub>3</sub> OsCp <sup>*</sup> )                                                                                                                                                                                                                                                      |
| U/Th–C(CH <sub>2</sub> ) distance (Å)                                                                          | 2.438                                                                                                                                                                                                                                                                                                                                                                                                                 | 2.504                                                                                                                                                                                                                                                                                                                                                                                                        | 2.518                                                                                                                                                                                                                                                                                                                                                                                                                              |
| Os–U/Th–Os angle (°)<br>(H <sub>4</sub> OsCp <sup>*</sup> )                                                    | 116.3                                                                                                                                                                                                                                                                                                                                                                                                                 | 120.7                                                                                                                                                                                                                                                                                                                                                                                                        | 135.6                                                                                                                                                                                                                                                                                                                                                                                                                              |
| Os–U/Th–Os angle (°)<br>((C <sub>5</sub> Me <sub>4</sub> CH <sub>2</sub> )OsH <sub>3</sub> OsCp <sup>*</sup> ) | 48.3                                                                                                                                                                                                                                                                                                                                                                                                                  | 47.5                                                                                                                                                                                                                                                                                                                                                                                                         | 47.4                                                                                                                                                                                                                                                                                                                                                                                                                               |
| U/Th–Os–Os angle (°)<br>((C <sub>5</sub> Me <sub>4</sub> CH <sub>2</sub> )OsH <sub>3</sub> OsCp <sup>*</sup> ) | 72.0, 59.6                                                                                                                                                                                                                                                                                                                                                                                                            | 71.3, 61.2                                                                                                                                                                                                                                                                                                                                                                                                   | 71.2, 61.4                                                                                                                                                                                                                                                                                                                                                                                                                         |
| U/Th–Os–Cp(centroid) angle<br>(°)                                                                              | 179.1, 179.1 (H <sub>4</sub> OsCp <sup>*</sup> ) <sub>2</sub><br>103.0, 121.7<br>((C <sub>5</sub> Me <sub>4</sub> CH <sub>2</sub> )OsH <sub>3</sub> OsCp <sup>*</sup> )                                                                                                                                                                                                                                               | 178.1, 179.6 (H <sub>4</sub> OsCp <sup>*</sup> ) <sub>2</sub><br>103.6, 120.0<br>((C <sub>5</sub> Me <sub>4</sub> CH <sub>2</sub> )OsH <sub>3</sub> OsCp <sup>*</sup> )                                                                                                                                                                                                                                      | 177.9, 177.6 (H <sub>4</sub> OsCp <sup>*</sup> ) <sub>2</sub><br>104.2, 119.3<br>((C <sub>5</sub> Me <sub>4</sub> CH <sub>2</sub> )OsH <sub>3</sub> OsCp <sup>*</sup> )                                                                                                                                                                                                                                                            |
| Os–Os–Cp (centroid) angle (°)                                                                                  | 175.0, 178.5                                                                                                                                                                                                                                                                                                                                                                                                          | 174.8, 178.7                                                                                                                                                                                                                                                                                                                                                                                                 | 175.3, 179.3                                                                                                                                                                                                                                                                                                                                                                                                                       |
| Os–H (cm <sup>-1</sup> )                                                                                       | [2050 – 1953] (H <sub>4</sub> OsCp <sup>*</sup> ) <sub>2</sub><br>[1619 – 1561]<br>((C <sub>5</sub> Me <sub>4</sub> CH <sub>2</sub> )OsH <sub>3</sub> OsCp <sup>*</sup> )<br>[1061 – 1057, 1036, 947,<br>900, 776, 644]<br>((C <sub>5</sub> Me <sub>4</sub> CH <sub>2</sub> )OsH <sub>3</sub> OsCp <sup>*</sup> )<br>[930 – 918, 856 – 837, 644 –<br>642, 585 – 564] (H <sub>4</sub> OsCp <sup>*</sup> ) <sub>2</sub> | [2037 – 1964] (H <sub>4</sub> OsCp <sup>*</sup> ) <sub>2</sub><br>[1608 – 1561]<br>((C <sub>5</sub> Me <sub>4</sub> CH <sub>2</sub> )OsH <sub>3</sub> OsCp <sup>*</sup> )<br>[1032 – 1019, 958, 907, 788,<br>648] ((C <sub>5</sub> Me <sub>4</sub> CH <sub>2</sub> )OsH <sub>3</sub> OsCp <sup>*</sup> )<br>[949 – 916, 887 – 846, 667 –<br>660, 588 – 570] (H <sub>4</sub> OsCp <sup>*</sup> ) <sub>2</sub> | [2072 – 1999] (H <sub>4</sub> OsCp <sup>*</sup> ) <sub>2</sub><br>[1620 – 1565]<br>((C <sub>5</sub> Me <sub>4</sub> CH <sub>2</sub> )OsH <sub>3</sub> OsCp <sup>*</sup> )<br>[1061 – 1060, 1034, 958,<br>908, 790 – 787, 651]<br>((C <sub>5</sub> Me <sub>4</sub> CH <sub>2</sub> )OsH <sub>3</sub> OsCp <sup>*</sup> )<br>[955 – 923, 902, 875 – 825,<br>759, 674, 576 – 569]<br>(H <sub>4</sub> OsCp <sup>*</sup> ) <sub>2</sub> |

**Table S6.** Tabulated calculated bond distances/angles and Os-H frequencies for **3-U**, **3-Th** and **4-Th**.

|                                                                                                           | <b>3-U (triplet)</b>                                                                                                                                                          | <b>3-Th (singlet)</b>                                                                                                                                                         | <b>4-Th (singlet)</b>                                                                                                                                                                                                    |
|-----------------------------------------------------------------------------------------------------------|-------------------------------------------------------------------------------------------------------------------------------------------------------------------------------|-------------------------------------------------------------------------------------------------------------------------------------------------------------------------------|--------------------------------------------------------------------------------------------------------------------------------------------------------------------------------------------------------------------------|
|                                                                                                           | Wiberg Bond Indexes (WBI)                                                                                                                                                     |                                                                                                                                                                               |                                                                                                                                                                                                                          |
| Os – H                                                                                                    | [0.60 – 0.62] (H <sub>4</sub> OsCp <sup>*</sup> ) <sub>2</sub><br>[0.32 – 0.41]<br>((C <sub>5</sub> Me <sub>4</sub> CH <sub>2</sub> )OsH <sub>3</sub> OsCp <sup>*</sup> )     | [0.61 – 0.63] (H <sub>4</sub> OsCp <sup>*</sup> ) <sub>2</sub><br>[0.32 – 0.41]<br>((C <sub>5</sub> Me <sub>4</sub> CH <sub>2</sub> )OsH <sub>3</sub> OsCp <sup>*</sup> )     | [0.60 – 0.61] (PhH <sub>3</sub> OsCp <sup>*</sup> )<br>[0.60 – 0.62] (H <sub>4</sub> OsCp <sup>*</sup> )<br>[0.31 – 0.40]<br>((C <sub>5</sub> Me <sub>4</sub> CH <sub>2</sub> )OsH <sub>3</sub> OsCp <sup>*</sup> )      |
| Os – Os<br>(C <sub>5</sub> Me <sub>4</sub> CH <sub>2</sub> )OsH <sub>3</sub> OsCp <sup>*</sup>            | 0.74                                                                                                                                                                          | 0.73                                                                                                                                                                          | 0.73                                                                                                                                                                                                                     |
| U/Th – H                                                                                                  | [0.18 – 0.21] H <sub>4</sub> OsCp <sup>*</sup> ) <sub>2</sub><br>[0.14, 0.15, 0.01]<br>((C <sub>5</sub> Me <sub>4</sub> CH <sub>2</sub> )OsH <sub>3</sub> OsCp <sup>*</sup> ) | [0.18 – 0.21] H <sub>4</sub> OsCp <sup>*</sup> ) <sub>2</sub><br>[0.15, 0.16, 0.02]<br>((C <sub>5</sub> Me <sub>4</sub> CH <sub>2</sub> )OsH <sub>3</sub> OsCp <sup>*</sup> ) | [0.16 – 0.21] (PhH <sub>3</sub> OsCp <sup>*</sup> )<br>[0.18 – 0.20] (H <sub>4</sub> OsCp <sup>*</sup> )<br>[0.16, 0.16, 0.03]<br>((C <sub>5</sub> Me <sub>4</sub> CH <sub>2</sub> )OsH <sub>3</sub> OsCp <sup>*</sup> ) |
| U/Th – Os                                                                                                 | [0.72, 0.72] H <sub>4</sub> OsCp <sup>*</sup> ) <sub>2</sub><br>[0.79, 0.53]<br>((C <sub>5</sub> Me <sub>4</sub> CH <sub>2</sub> )OsH <sub>3</sub> OsCp <sup>*</sup> )        | [0.69, 0.70] H <sub>4</sub> OsCp <sup>*</sup> ) <sub>2</sub><br>[0.68, 0.53]<br>((C <sub>5</sub> Me <sub>4</sub> CH <sub>2</sub> )OsH <sub>3</sub> OsCp <sup>*</sup> )        | [0.61 (Ph), 0.71] (H <sub>4</sub> OsCp <sup>*</sup> ) <sub>2</sub><br>[0.70, 0.55]<br>((C <sub>5</sub> Me <sub>4</sub> CH <sub>2</sub> )OsH <sub>3</sub> OsCp <sup>*</sup> )                                             |
| U/Th – CH <sub>2</sub>                                                                                    | 0.72                                                                                                                                                                          | 0.64                                                                                                                                                                          | 0.65                                                                                                                                                                                                                     |
| C (Cp <sup>*</sup> ) – Os, C (Cp <sup>*</sup> ) – Th                                                      | -                                                                                                                                                                             | -                                                                                                                                                                             | 0.70, 0.27                                                                                                                                                                                                               |
| Os – C (Cp <sup>*</sup> )                                                                                 | [0.31 – 0.42] H <sub>4</sub> OsCp <sup>*</sup> ) <sub>2</sub><br>[0.35 – 0.43]<br>((C <sub>5</sub> Me <sub>4</sub> CH <sub>2</sub> )OsH <sub>3</sub> OsCp <sup>*</sup> )      | [0.30 – 0.41] H <sub>4</sub> OsCp <sup>*</sup> ) <sub>2</sub><br>[0.36 – 0.43]<br>((C <sub>5</sub> Me <sub>4</sub> CH <sub>2</sub> )OsH <sub>3</sub> OsCp <sup>*</sup> )      | [0.30 – 0.41] (PhH <sub>3</sub> OsCp <sup>*</sup> )<br>[0.29 – 0.41] (H <sub>4</sub> OsCp <sup>*</sup> )<br>[0.36 – 0.42]<br>((C <sub>5</sub> Me <sub>4</sub> CH <sub>2</sub> )OsH <sub>3</sub> OsCp <sup>*</sup> )      |
|                                                                                                           | Natural Charges                                                                                                                                                               |                                                                                                                                                                               |                                                                                                                                                                                                                          |
| Os Natural Charges<br>(H <sub>4</sub> OsCp <sup>*</sup> ) <sub>2</sub>                                    | [-1.02, -1.03]                                                                                                                                                                | [-1.02, -1.03]                                                                                                                                                                | [-0.82 (Ph), -1.00]                                                                                                                                                                                                      |
| Os Natural Charges<br>(C <sub>5</sub> Me <sub>4</sub> CH <sub>2</sub> )OsH <sub>3</sub> OsCp <sup>*</sup> | [-0.57, -0.60]                                                                                                                                                                | [-0.60, -0.61]                                                                                                                                                                | [-0.58, -0.58]                                                                                                                                                                                                           |
| U/Th Natural Charges                                                                                      | 0.52                                                                                                                                                                          | 0.68                                                                                                                                                                          | 0.44                                                                                                                                                                                                                     |

**Table S7.** Wiberg Bond Indexes and Natural Charges for **3-U**, **3-Th** and **4-Th**.

| 3-U                                                                                                                                                                                                                                                                                                                                                                                                                                                                                                                                                                                                                                                                                                               | 3-Th                                                                                                                                                                                                                                                                                                                      | 4-Th                                                                                                                             |
|-------------------------------------------------------------------------------------------------------------------------------------------------------------------------------------------------------------------------------------------------------------------------------------------------------------------------------------------------------------------------------------------------------------------------------------------------------------------------------------------------------------------------------------------------------------------------------------------------------------------------------------------------------------------------------------------------------------------|---------------------------------------------------------------------------------------------------------------------------------------------------------------------------------------------------------------------------------------------------------------------------------------------------------------------------|----------------------------------------------------------------------------------------------------------------------------------|
| <p><b>Alpha Spin Orbitals</b><br/> (0.75325) BD ( 1)Os 15 -Os 16<br/> ( 50.26%) Os 15 s( 0.08%)p48.18( 3.80%)d99.99( 96.10%)<br/> ( 49.74%) Os 16 s( 0.06%)p81.37( 4.50%)d99.99( 95.41%)</p> <p>(0.72128) BD ( 2)Os 15 -Os 16<br/> ( 48.78%) Os 15 s( 0.00%)p 1.00( 3.14%)d30.83( 96.84%)<br/> ( 51.22%) Os 16 s( 0.00%)p1.00( 3.44%)d28.04( 96.54%)</p> <p><b>Beta Spin Orbitals</b><br/> (0.75552) BD ( 1)Os 15 -Os 16<br/> ( 50.54%) Os 15 s( 0.09%)p42.07( 3.66%)d99.99( 96.23%)<br/> ( 49.46%) Os 16 s( 0.07%)p63.21( 4.31%)d99.99( 95.59%)</p> <p>(0.72156) BD ( 2)Os 15 -Os 16<br/> ( 48.87%) Os 15 s( 0.00%)p 1.00( 3.12%)d31.01( 96.86%)<br/> ( 51.13%) Os 16 s( 0.00%)p 1.00( 3.44%)d28.09( 96.55%)</p> | <p>(1.83739) BD ( 1)Os 25 -Os 36<br/> ( 55.70%) Os 25 s( 0.24%)p 7.41( 1.81%)d99.99( 97.94%)<br/> ( 44.30%) Os 36 s( 0.20%)p 8.17( 1.65%)d99.99( 98.14%)</p> <p>(1.59753) BD*( 1)Os 25 -Os 36<br/> ( 44.30%) Os 25 s( 0.24%)p 7.41( 1.81%)d99.99( 97.94%)<br/> ( 55.70%) Os 36 s( 0.20%)p 8.17( 1.65%)d99.99( 98.14%)</p> |                                                                                                                                  |
| <p><b>Alpha Spin Orbitals</b><br/> CR Os 15 → LP* Os 16           ~190<br/> LP Os 15 → LP* Os 16           ~140</p> <p>CR Os 16 → LP* Os 15           ~150<br/> LP Os 16 → LP*Os 15           ~70</p> <p><b>Beta Spin Orbitals</b><br/> CR Os 15 → LP* Os 16           ~210<br/> LP Os 15 → LP* Os 16           ~140</p> <p>CR Os 16 → LP* Os 15           ~140<br/> LP Os 16 → LP*Os 15           ~70</p>                                                                                                                                                                                                                                                                                                        | <p>CR Os 25 → LP* Os 36           ~430<br/> LP Os 25 → LP* Os 36           ~205</p> <p>CR Os 36 → LP* Os 25           ~303<br/> LP Os 36 → LP*Os 25           ~130</p>                                                                                                                                                    | <p>CR Os 30 → LP* Os 4   ~440<br/> LP Os 30 → LP* Os 41 ~320</p> <p>CR Os 41 → LP* Os 30 ~370<br/> LP Os 41 → LP* Os 30 ~240</p> |

**Table S8.** NBO Analysis of the Os–Os bonding in **3-U**, **3-Th** and **4-Th**.

|                                    | 4-Th                                                                                                                                          |                 |
|------------------------------------|-----------------------------------------------------------------------------------------------------------------------------------------------|-----------------|
| NBO bonding                        | (1.82905) BD C - Os<br>(55.49%) C s(33.22%) p 2.01(66.78%) d 0.00(0.01%)<br>(44.51%) Os s(15.23%) p 0.80(12.15%) d 4.77(72.59%) f 0.00(0.03%) |                 |
| Second order perturbation analysis | 7. BD (1) C2-Os7/208. LP*(1)Th 18                                                                                                             | 337.24 kcal/mol |
|                                    | 7. BD (1) C2-Os7/209. LP*(2)Th 18                                                                                                             | 56.60 kcal/mol  |
|                                    | 7. BD (1) C2-Os7/210. LP*(3)Th 18                                                                                                             | 294.98 kcal/mol |
|                                    | 7. BD (1)C2-Os7/211. LP*(4)Th 18                                                                                                              | 550.91 kcal/mol |
|                                    | 7. BD (1) C2-Os7/213. LP*(6)Th 18                                                                                                             | 37.08 kcal/mol  |
|                                    | 7. BD (1) C2-Os7/214. LP*(7)Th 18                                                                                                             | 400.92 kcal/mol |
|                                    | 7. BD (1) C2-Os7/215. LP*(8)Th 18                                                                                                             | 253.85 kcal/mol |
|                                    | 7. BD (1) C2-Os7/216. LP*(9)Th 18                                                                                                             | 230.39 kcal/mol |
|                                    | 7. BD (1) C2-Os7/217. LP*(10)Th 18                                                                                                            | 119.21 kcal/mol |
|                                    | 7. BD (1) C2-Os7/218. LP*(11)Th 18                                                                                                            | 276.41 kcal/mol |
|                                    | 7. BD (1) C2-Os7/219. LP*(12)Th 18                                                                                                            | 32.30 kcal/mol  |
|                                    | 7. BD (1) C2-Os7/220. LP*(13)Th 18                                                                                                            | 40.26 kcal/mol  |
|                                    | 7. BD (1) C2-Os7/221. LP*(14)Th 18                                                                                                            | 2.06 kcal/mol   |
|                                    | 7. BD (1) C2-Os7/222. LP*(15)Th 18                                                                                                            | 147.04 kcal/mol |
|                                    | 7. BD (1) C2-Os7/***. BD*(1)Th 18-C 38                                                                                                        | 192.37 kcal/mol |

**Table S9.** NBO Analysis of the Th–C<sub>phenyl</sub>–Os bonding in **4-Th**.

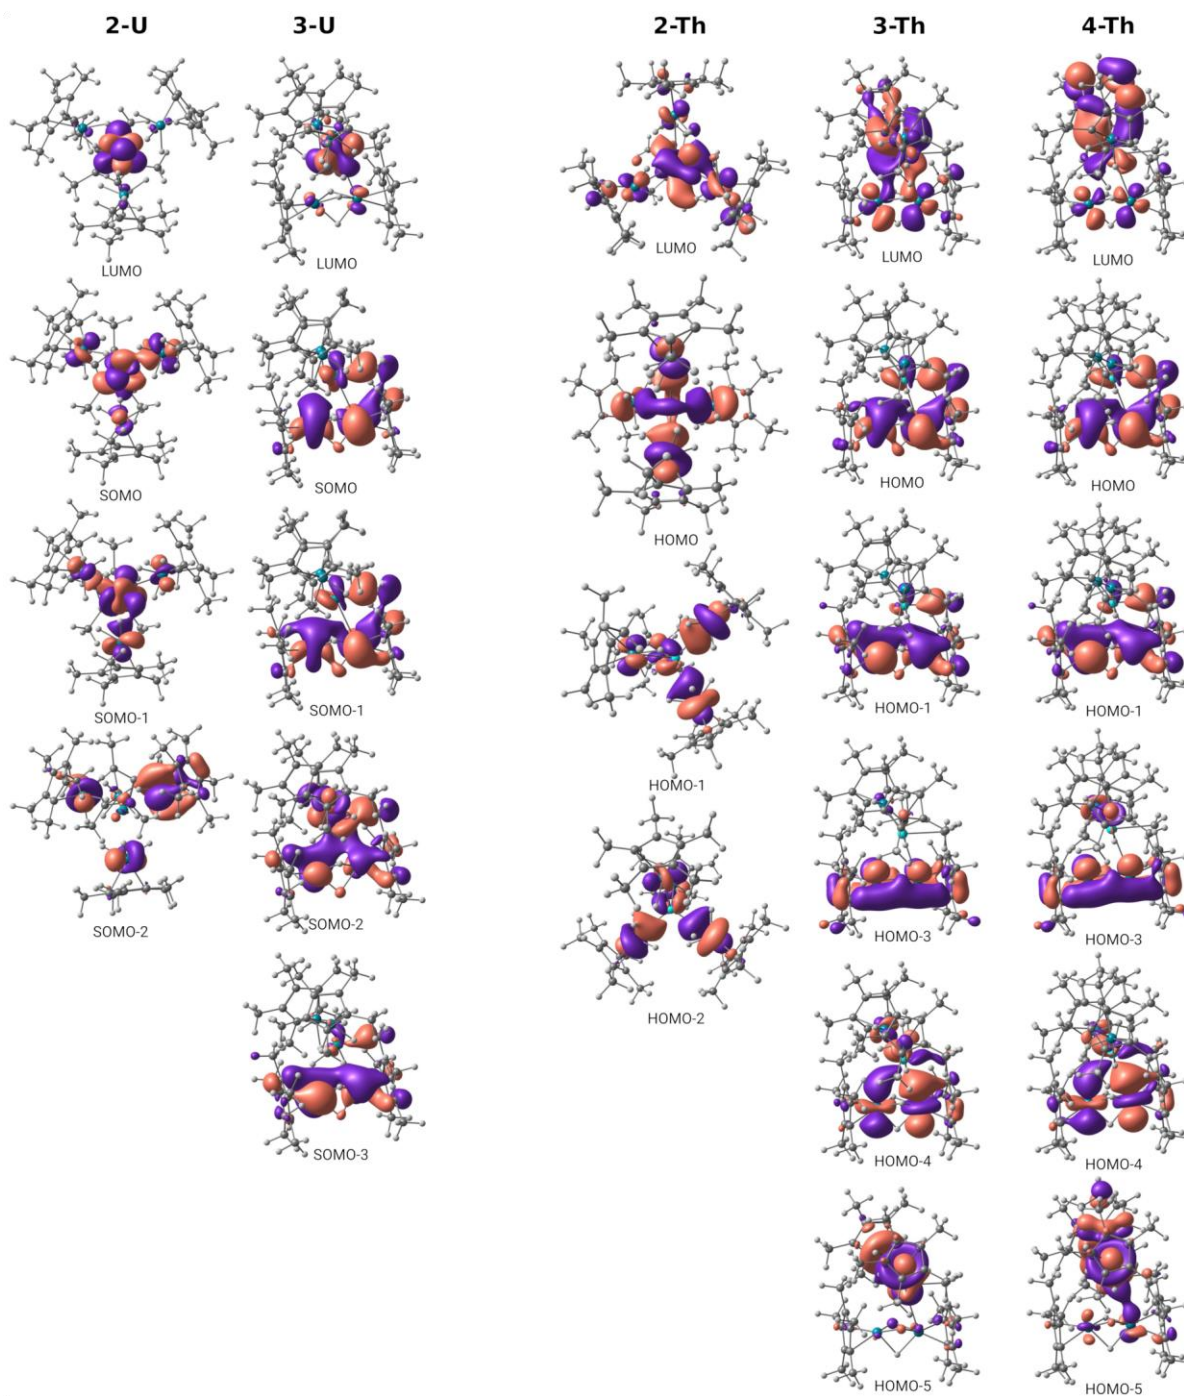

**Figure S35.** Lowest unoccupied molecular orbital and highest occupied molecular orbitals of complexes **2-U**, **3-U**, **2-Th**, **3-Th** and **4-Th**.

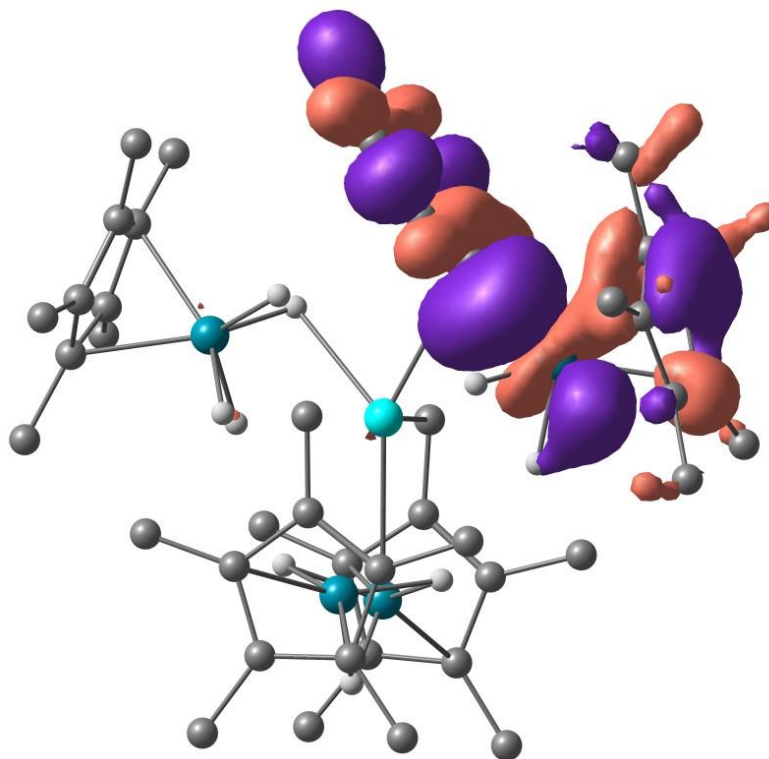

**Figure S36.** Depiction of the molecular orbital corresponding to the Th-C<sub>phenyl</sub>-Os three-center-two-electron bond in **4-Th**.

**Table S10.** Coordinates of the most stable computed structures.

2-U linear triplet

|    |           |          |           |
|----|-----------|----------|-----------|
| C  | 10.573605 | 3.349826 | 3.096335  |
| C  | 9.825026  | 2.862014 | 1.954930  |
| C  | 9.162305  | 1.644839 | 2.358364  |
| C  | 9.494247  | 1.383429 | 3.723800  |
| C  | 10.355368 | 2.430506 | 4.187288  |
| Os | 8.426980  | 3.425191 | 3.558105  |
| U  | 6.142816  | 5.123644 | 4.173205  |
| Os | 5.736045  | 6.866361 | 1.878492  |
| C  | 4.876264  | 8.838468 | 1.033365  |
| C  | 6.299635  | 8.837429 | 0.905388  |
| C  | 6.679489  | 7.713958 | 0.081259  |
| C  | 5.465339  | 7.018884 | -0.295506 |
| C  | 4.355586  | 7.719657 | 0.306314  |
| C  | 8.056907  | 7.416864 | -0.420446 |
| C  | 5.366976  | 5.879579 | -1.259467 |
| C  | 7.230453  | 9.863896 | 1.467170  |
| C  | 2.908310  | 7.392975 | 0.120410  |
| C  | 4.066385  | 9.846981 | 1.782039  |
| C  | 9.857314  | 3.429895 | 0.571507  |
| C  | 8.328969  | 0.770596 | 1.476989  |
| C  | 10.996424 | 2.503011 | 5.536207  |
| C  | 9.041897  | 0.205341 | 4.524459  |
| C  | 11.522756 | 4.505667 | 3.096977  |
| Os | 3.786012  | 3.484628 | 4.669917  |
| C  | 1.507388  | 3.358194 | 4.613733  |
| C  | 2.011529  | 2.298249 | 3.799570  |
| C  | 2.835869  | 1.453207 | 4.614484  |
| C  | 2.834760  | 1.989128 | 5.957093  |
| C  | 2.009917  | 3.180452 | 5.951996  |
| C  | 1.710833  | 2.089591 | 2.350444  |
| C  | 3.486028  | 0.179002 | 4.178651  |
| C  | 3.437634  | 1.341355 | 7.162906  |
| C  | 1.629219  | 3.992858 | 7.148717  |
| C  | 0.573165  | 4.436534 | 4.167271  |
| Os | 6.649233  | 6.761661 | 6.528311  |
| C  | 7.246678  | 8.748177 | 7.338408  |
| C  | 5.928342  | 8.381551 | 7.809253  |
| C  | 6.072405  | 7.198844 | 8.633006  |
| C  | 7.468147  | 6.858390 | 8.672310  |
| C  | 8.186248  | 7.804817 | 7.880033  |
| C  | 4.983856  | 6.530908 | 9.411366  |
| C  | 8.068899  | 5.726962 | 9.442585  |
| C  | 4.673592  | 9.172807 | 7.618073  |
| C  | 9.667332  | 7.835334 | 7.680601  |
| C  | 7.588215  | 9.966185 | 6.540594  |
| H  | 4.680328  | 9.688507 | 6.655154  |
| H  | 4.553644  | 9.925394 | 8.407941  |
| H  | 3.796386  | 8.522043 | 7.632471  |
| H  | 10.090826 | 6.828942 | 7.709155  |
| H  | 10.152993 | 8.429958 | 8.464514  |
| H  | 9.924688  | 8.275664 | 6.714960  |
| H  | 4.020549  | 6.643180 | 8.909297  |
| H  | 4.895341  | 6.959432 | 10.417921 |
| H  | 5.175460  | 5.460252 | 9.514605  |



|   |           |           |           |
|---|-----------|-----------|-----------|
| H | 8.449311  | 9.783821  | 5.893474  |
| H | 7.827130  | 10.814001 | 7.195299  |
| H | 6.753556  | 10.258223 | 5.899681  |
| H | 2.423936  | 3.978792  | 7.897711  |
| H | 0.713476  | 3.608156  | 7.615758  |
| H | 1.457808  | 5.036658  | 6.875325  |
| H | 0.709222  | 5.343308  | 4.760353  |
| H | -0.470957 | 4.115831  | 4.272310  |
| H | 0.743203  | 4.698279  | 3.120556  |
| H | 3.802325  | 0.235241  | 3.134463  |
| H | 2.797691  | -0.669671 | 4.280455  |
| H | 4.373371  | -0.031313 | 4.779512  |
| H | 1.538304  | 3.040773  | 1.842195  |
| H | 0.813385  | 1.470810  | 2.225589  |
| H | 2.539086  | 1.588666  | 1.844749  |
| H | 4.350550  | 0.801359  | 6.901525  |
| H | 2.739674  | 0.629888  | 7.622626  |
| H | 3.704735  | 2.088428  | 7.913646  |
| H | 7.364304  | 4.898010  | 9.536953  |
| H | 8.348827  | 6.050631  | 10.452947 |
| H | 8.965492  | 5.344761  | 8.949688  |
| H | 6.859918  | 10.255568 | 2.417090  |
| H | 7.347883  | 10.706484 | 0.774044  |
| H | 8.218612  | 9.437037  | 1.650800  |
| H | 2.768288  | 6.323941  | -0.052942 |
| H | 2.491230  | 7.933778  | -0.738529 |
| H | 2.326308  | 7.661985  | 1.004878  |
| H | 8.811099  | 7.694111  | 0.319849  |
| H | 8.270990  | 7.964751  | -1.347123 |
| H | 8.175580  | 6.349984  | -0.621639 |
| H | 3.149723  | 9.402910  | 2.176047  |
| H | 3.784510  | 10.680917 | 1.127126  |
| H | 4.626843  | 10.255549 | 2.625654  |
| H | 11.199737 | 5.274961  | 2.392141  |
| H | 12.534821 | 4.188002  | 2.815259  |
| H | 11.574538 | 4.969534  | 4.084628  |
| H | 8.963310  | 0.456202  | 5.584493  |
| H | 9.750249  | -0.626617 | 4.424890  |
| H | 8.062041  | -0.144527 | 4.192474  |
| H | 11.214964 | 3.537235  | 5.810127  |
| H | 11.938711 | 1.940930  | 5.552798  |
| H | 10.341897 | 2.089464  | 6.306877  |
| H | 7.549076  | 0.262186  | 2.048262  |
| H | 8.947025  | 0.006095  | 0.989486  |
| H | 7.837559  | 1.355870  | 0.697003  |
| H | 8.912502  | 3.249902  | 0.053159  |
| H | 10.663919 | 2.984552  | -0.025023 |
| H | 10.012076 | 4.510714  | 0.598951  |
| H | 6.265681  | 5.259961  | -1.222251 |
| H | 5.243588  | 6.240094  | -2.288703 |
| H | 4.517181  | 5.236099  | -1.020350 |
| H | 7.268959  | 2.911486  | 4.609054  |
| H | 7.033652  | 3.414560  | 2.679689  |
| H | 8.306586  | 4.958462  | 3.011951  |
| H | 8.524350  | 4.385818  | 4.873273  |
| H | 5.262472  | 2.789684  | 4.657641  |
| H | 4.604988  | 4.144471  | 5.913016  |

|   |          |          |          |
|---|----------|----------|----------|
| H | 3.704471 | 5.111989 | 4.418149 |
| H | 4.393847 | 3.700973 | 3.150524 |
| H | 6.560710 | 5.470975 | 1.731737 |
| H | 4.663302 | 5.662986 | 2.133376 |
| H | 5.035428 | 7.170746 | 3.341738 |
| H | 7.012374 | 7.025873 | 2.905678 |
| H | 7.826683 | 6.465561 | 5.413627 |
| H | 6.164742 | 7.466731 | 5.143029 |
| H | 5.152559 | 6.188599 | 6.228393 |
| H | 6.817694 | 5.118549 | 6.530237 |

2-Th linear singlet

|    |           |           |           |
|----|-----------|-----------|-----------|
| C  | 10.669209 | 3.319280  | 3.229976  |
| C  | 10.033419 | 2.830677  | 2.023215  |
| C  | 9.338824  | 1.616355  | 2.352996  |
| C  | 9.527350  | 1.351908  | 3.743844  |
| C  | 10.343172 | 2.397616  | 4.297172  |
| Os | 8.505183  | 3.397635  | 3.534559  |
| Th | 6.158504  | 5.131700  | 4.131589  |
| Os | 5.685561  | 6.919480  | 1.799929  |
| C  | 4.770583  | 8.869524  | 0.971631  |
| C  | 6.187449  | 8.889430  | 0.784232  |
| C  | 6.550536  | 7.763450  | -0.041229 |
| C  | 5.333263  | 7.044277  | -0.361284 |
| C  | 4.237523  | 7.734906  | 0.277856  |
| C  | 7.911257  | 7.481998  | -0.594752 |
| C  | 5.213529  | 5.896262  | -1.312416 |
| C  | 7.123378  | 9.936831  | 1.296437  |
| C  | 2.788924  | 7.386182  | 0.151964  |
| C  | 3.975799  | 9.876205  | 1.738805  |
| C  | 10.184586 | 3.411231  | 0.653157  |
| C  | 8.581933  | 0.755267  | 1.393902  |
| C  | 10.871030 | 2.449935  | 5.695447  |
| C  | 9.001606  | 0.167526  | 4.488900  |
| C  | 11.623892 | 4.467266  | 3.318030  |
| Os | 3.742571  | 3.469985  | 4.647148  |
| C  | 1.475709  | 3.357179  | 4.603870  |
| C  | 1.957402  | 2.272045  | 3.807568  |
| C  | 2.774373  | 1.432618  | 4.632214  |
| C  | 2.794077  | 1.992742  | 5.962990  |
| C  | 1.986176  | 3.196274  | 5.943920  |
| C  | 1.641116  | 2.038486  | 2.365673  |
| C  | 3.412277  | 0.146707  | 4.213321  |
| C  | 3.401225  | 1.359078  | 7.174130  |
| C  | 1.619472  | 4.029737  | 7.130584  |
| C  | 0.543699  | 4.432940  | 4.146162  |
| Os | 6.700985  | 6.775954  | 6.554062  |
| C  | 7.258995  | 8.769770  | 7.399685  |
| C  | 5.960022  | 8.351094  | 7.878690  |
| C  | 6.151994  | 7.149675  | 8.666349  |
| C  | 7.559935  | 6.850715  | 8.673158  |
| C  | 8.235032  | 7.843277  | 7.899225  |
| C  | 5.098433  | 6.433320  | 9.449930  |
| C  | 8.209677  | 5.722693  | 9.408011  |
| C  | 4.680472  | 9.111013  | 7.729251  |
| C  | 9.710692  | 7.924306  | 7.676187  |
| C  | 7.549521  | 10.015500 | 6.624999  |

|   |           |           |           |
|---|-----------|-----------|-----------|
| H | 4.652246  | 9.644841  | 6.776653  |
| H | 4.557198  | 9.844761  | 8.536139  |
| H | 3.821948  | 8.436045  | 7.749578  |
| H | 10.164660 | 6.930976  | 7.673051  |
| H | 10.190734 | 8.513943  | 8.467216  |
| H | 9.938444  | 8.396163  | 6.718082  |
| H | 4.122485  | 6.531100  | 8.969719  |
| H | 5.019152  | 6.834563  | 10.468399 |
| H | 5.321008  | 5.366136  | 9.521965  |
| H | 8.405518  | 9.875711  | 5.960852  |
| H | 7.772634  | 10.854244 | 7.296640  |
| H | 6.695905  | 10.296361 | 6.004558  |
| H | 2.418972  | 4.020294  | 7.874572  |
| H | 0.703364  | 3.660214  | 7.609000  |
| H | 1.455797  | 5.070660  | 6.842093  |
| H | 0.688652  | 5.348057  | 4.724001  |
| H | -0.501547 | 4.119735  | 4.262296  |
| H | 0.709267  | 4.677767  | 3.094648  |
| H | 3.717848  | 0.181127  | 3.165093  |
| H | 2.718511  | -0.694345 | 4.338001  |
| H | 4.303899  | -0.059000 | 4.809240  |
| H | 1.473489  | 2.981389  | 1.840816  |
| H | 0.735849  | 1.427285  | 2.262050  |
| H | 2.458794  | 1.518687  | 1.861870  |
| H | 4.308430  | 0.808582  | 6.914777  |
| H | 2.701369  | 0.659827  | 7.649370  |
| H | 3.678570  | 2.115658  | 7.911392  |
| H | 7.530402  | 4.872966  | 9.502345  |
| H | 8.504439  | 6.035231  | 10.417669 |
| H | 9.104172  | 5.374511  | 8.886934  |
| H | 6.784983  | 10.333577 | 2.256174  |
| H | 7.198538  | 10.772968 | 0.589821  |
| H | 8.125045  | 9.527980  | 1.444281  |
| H | 2.657993  | 6.313219  | -0.003129 |
| H | 2.330983  | 7.910713  | -0.696218 |
| H | 2.238071  | 7.657386  | 1.055489  |
| H | 8.690256  | 7.785831  | 0.108360  |
| H | 8.075659  | 8.017869  | -1.538405 |
| H | 8.041714  | 6.414164  | -0.783015 |
| H | 3.081008  | 9.424629  | 2.172435  |
| H | 3.658023  | 10.698002 | 1.084996  |
| H | 4.561949  | 10.302441 | 2.555762  |
| H | 11.364491 | 5.245853  | 2.597143  |
| H | 12.653539 | 4.144773  | 3.116816  |
| H | 11.597591 | 4.921541  | 4.311064  |
| H | 8.836121  | 0.407537  | 5.541278  |
| H | 9.710145  | -0.668772 | 4.439159  |
| H | 8.050128  | -0.170508 | 4.072555  |
| H | 11.074474 | 3.479771  | 5.996416  |
| H | 11.803135 | 1.877939  | 5.787087  |
| H | 10.148933 | 2.038282  | 6.404370  |
| H | 7.755665  | 0.242229  | 1.890763  |
| H | 9.238938  | -0.005504 | 0.954054  |
| H | 8.161240  | 1.349544  | 0.580137  |
| H | 9.291896  | 3.230849  | 0.049752  |
| H | 11.043830 | 2.972963  | 0.129547  |
| H | 10.332407 | 4.492093  | 0.702258  |

|                 |          |           |           |
|-----------------|----------|-----------|-----------|
| H               | 6.122317 | 5.290458  | -1.307404 |
| H               | 5.042830 | 6.246929  | -2.338349 |
| H               | 4.384131 | 5.241971  | -1.034277 |
| H               | 7.370725 | 2.916235  | 4.624651  |
| H               | 7.109885 | 3.291871  | 2.663694  |
| H               | 8.354126 | 4.865582  | 2.835945  |
| H               | 8.588732 | 4.469126  | 4.760694  |
| H               | 5.206300 | 2.747778  | 4.555265  |
| H               | 4.606327 | 4.083827  | 5.885220  |
| H               | 3.643307 | 5.098696  | 4.447554  |
| H               | 4.271431 | 3.728275  | 3.107391  |
| H               | 6.563189 | 5.556998  | 1.630161  |
| H               | 4.646858 | 5.692824  | 2.095971  |
| H               | 5.013813 | 7.250742  | 3.268258  |
| H               | 6.974649 | 7.130695  | 2.797972  |
| H               | 7.894662 | 6.475148  | 5.459756  |
| H               | 6.232619 | 7.511118  | 5.175468  |
| H               | 5.199936 | 6.214530  | 6.251452  |
| H               | 6.866545 | 5.137303  | 6.569450  |
| 3-U n=3 triplet |          |           |           |
| C               | 1.897157 | 8.430945  | 8.584890  |
| C               | 3.022094 | 7.820931  | 9.265304  |
| C               | 4.130236 | 8.744194  | 9.185604  |
| C               | 3.691600 | 9.906908  | 8.473322  |
| C               | 2.326047 | 9.715926  | 8.095165  |
| Os              | 3.524849 | 8.038222  | 7.135741  |
| U               | 4.337943 | 6.704833  | 4.667056  |
| C               | 6.741742 | 7.103095  | 4.776259  |
| C               | 7.099160 | 5.677000  | 4.702133  |
| C               | 7.240460 | 4.757654  | 5.813175  |
| C               | 7.489198 | 3.443294  | 5.293298  |
| C               | 7.464858 | 3.522588  | 3.851504  |
| C               | 7.206376 | 4.890281  | 3.492813  |
| C               | 5.469795 | 8.561208  | 9.824509  |
| Os              | 5.505906 | 4.101839  | 4.637072  |
| Os              | 3.049643 | 3.824453  | 4.666810  |
| C               | 1.034962 | 4.778342  | 4.766336  |
| C               | 1.177822 | 4.039918  | 3.540104  |
| C               | 1.394177 | 2.658562  | 3.865964  |
| C               | 1.405487 | 2.542946  | 5.308460  |
| C               | 1.198478 | 3.850468  | 5.856153  |
| C               | 1.048977 | 4.617652  | 2.169701  |
| C               | 1.509836 | 1.529334  | 2.894069  |
| C               | 1.098359 | 4.200248  | 7.303501  |
| C               | 1.551796 | 1.273702  | 6.083631  |
| C               | 7.236971 | 5.147931  | 7.254645  |
| C               | 7.162280 | 5.443562  | 2.106085  |
| C               | 7.754816 | 2.404955  | 2.903726  |
| C               | 7.790007 | 2.222218  | 6.099759  |
| C               | 0.555227 | 6.187201  | 4.891512  |
| C               | 4.512645 | 11.125381 | 8.200359  |
| C               | 2.992458 | 6.554852  | 10.061078 |
| C               | 1.466264 | 10.712293 | 7.386050  |
| C               | 0.493730 | 7.915912  | 8.561495  |
| Os              | 3.670277 | 8.013579  | 2.139833  |
| C               | 2.065252 | 8.651675  | 0.612491  |

|   |           |           |           |
|---|-----------|-----------|-----------|
| C | 2.997263  | 7.740245  | 0.015408  |
| C | 4.310750  | 8.342961  | 0.070551  |
| C | 4.171035  | 9.632057  | 0.714331  |
| C | 2.781735  | 9.810647  | 1.044904  |
| C | 5.546361  | 7.808038  | -0.580320 |
| C | 5.249438  | 10.656006 | 0.873183  |
| C | 2.659194  | 6.458570  | -0.676393 |
| C | 2.182287  | 11.028376 | 1.671471  |
| C | 0.590003  | 8.441009  | 0.729486  |
| H | 2.185704  | 0.559129  | 5.553237  |
| H | 0.575296  | 0.801146  | 6.250113  |
| H | 2.009789  | 1.458920  | 7.057910  |
| H | 6.815434  | 4.691051  | 1.394215  |
| H | 8.161321  | 5.775128  | 1.794933  |
| H | 6.482495  | 6.296241  | 2.040126  |
| H | 6.555336  | 5.982856  | 7.434723  |
| H | 8.242500  | 5.453356  | 7.571060  |
| H | 6.916422  | 4.317137  | 7.887135  |
| H | 1.942892  | 1.868215  | 1.950115  |
| H | 0.526717  | 1.090372  | 2.680090  |
| H | 2.154536  | 0.738090  | 3.284200  |
| H | 0.859729  | 6.797084  | 4.037455  |
| H | 0.940641  | 6.668945  | 5.791908  |
| H | -0.542225 | 6.202505  | 4.937030  |
| H | 1.633951  | 3.476316  | 7.921715  |
| H | 0.051525  | 4.224527  | 7.632387  |
| H | 1.543636  | 5.181903  | 7.482517  |
| H | 1.503266  | 5.610999  | 2.130225  |
| H | -0.005759 | 4.696469  | 1.875100  |
| H | 1.561964  | 3.994663  | 1.433783  |
| H | 5.572198  | 10.876267 | 8.113308  |
| H | 4.401968  | 11.853811 | 9.013010  |
| H | 4.206853  | 11.608423 | 7.270064  |
| H | 7.288013  | 2.257940  | 7.069398  |
| H | 8.868708  | 2.126474  | 6.278802  |
| H | 7.452961  | 1.318346  | 5.586763  |
| H | 7.420352  | 1.446695  | 3.308572  |
| H | 8.831272  | 2.329361  | 2.702190  |
| H | 7.242462  | 2.556521  | 1.950849  |
| H | 5.088525  | 11.262400 | 1.767319  |
| H | 5.284157  | 11.328546 | 0.006953  |
| H | 6.227458  | 10.180303 | 0.971196  |
| H | 2.260063  | 5.853716  | 9.656129  |
| H | 2.730182  | 6.752462  | 11.108073 |
| H | 3.964276  | 6.056708  | 10.041758 |
| H | 6.443405  | 8.144478  | -0.055744 |
| H | 5.619868  | 8.138044  | -1.624320 |
| H | 5.551147  | 6.715838  | -0.569284 |
| H | -0.082344 | 8.314698  | 9.406050  |
| H | 0.469702  | 6.827063  | 8.626165  |
| H | -0.018291 | 8.202834  | 7.640007  |
| H | 2.053854  | 11.318701 | 6.693479  |
| H | 0.981170  | 11.387412 | 8.101940  |
| H | 0.684645  | 10.214823 | 6.808106  |
| H | 3.453030  | 5.719946  | -0.547412 |
| H | 2.519549  | 6.624898  | -1.751866 |
| H | 1.738421  | 6.025151  | -0.282101 |

|                  |           |           |           |
|------------------|-----------|-----------|-----------|
| H                | 0.347618  | 7.381166  | 0.829897  |
| H                | 0.072993  | 8.821859  | -0.159778 |
| H                | 0.184877  | 8.958893  | 1.601547  |
| H                | 5.721891  | 7.502018  | 9.907576  |
| H                | 5.484429  | 8.992600  | 10.833130 |
| H                | 6.256381  | 9.043126  | 9.239522  |
| H                | 1.311612  | 10.772947 | 2.279307  |
| H                | 1.861939  | 11.742428 | 0.902710  |
| H                | 2.902716  | 11.530941 | 2.319902  |
| H                | 7.150414  | 7.691582  | 3.952321  |
| H                | 7.009066  | 7.561489  | 5.731259  |
| H                | 2.719482  | 8.277070  | 5.721496  |
| H                | 4.612166  | 8.720959  | 6.101919  |
| H                | 4.801080  | 7.015664  | 7.111981  |
| H                | 2.957097  | 6.557467  | 6.742677  |
| H                | 3.602157  | 8.867859  | 3.542867  |
| H                | 5.185525  | 8.036766  | 2.745828  |
| H                | 2.529828  | 7.284921  | 3.072862  |
| H                | 4.114052  | 6.436573  | 2.201810  |
| H                | 4.404691  | 2.638031  | 4.676306  |
| H                | 4.190686  | 4.353430  | 3.384075  |
| H                | 4.206006  | 4.369874  | 5.920123  |
| 3-Th n=3 singlet |           |           |           |
| H                | 9.344906  | 9.471556  | 7.660663  |
| Os               | 8.354274  | 8.520901  | 8.572232  |
| C                | 6.846483  | 7.989845  | 7.048213  |
| C                | 8.012711  | 7.200819  | 6.744508  |
| C                | 8.269561  | 6.333061  | 7.851352  |
| C                | 7.275882  | 6.575603  | 8.855634  |
| C                | 6.380967  | 7.600672  | 8.363792  |
| C                | 7.113304  | 5.816885  | 10.133713 |
| C                | 9.366170  | 5.321027  | 7.931647  |
| C                | 8.780309  | 7.231404  | 5.462168  |
| C                | 5.113358  | 8.046459  | 9.020156  |
| C                | 6.151535  | 8.925580  | 6.111243  |
| Th               | 9.885332  | 10.721711 | 9.886566  |
| Os               | 12.082748 | 12.173622 | 8.476154  |
| C                | 13.502992 | 12.261582 | 6.676963  |
| C                | 12.723918 | 13.458599 | 6.686859  |
| C                | 12.960715 | 14.141170 | 7.929085  |
| C                | 13.909811 | 13.358635 | 8.693767  |
| C                | 14.239765 | 12.187375 | 7.908544  |
| C                | 14.559531 | 13.774104 | 9.975346  |
| C                | 12.428675 | 15.487492 | 8.304108  |
| C                | 11.850660 | 13.944366 | 5.575623  |
| C                | 15.277716 | 11.163549 | 8.239942  |
| C                | 13.583536 | 11.278373 | 5.554157  |
| Os               | 9.268727  | 11.322151 | 12.696088 |
| C                | 7.182528  | 11.744811 | 12.171484 |
| C                | 8.005409  | 12.604026 | 11.350400 |
| C                | 8.788658  | 13.415967 | 12.255667 |
| C                | 8.408515  | 13.106001 | 13.607125 |
| C                | 7.408226  | 12.064434 | 13.555876 |
| C                | 8.895260  | 13.798466 | 14.838060 |
| C                | 9.755552  | 14.474428 | 11.837120 |
| C                | 8.148324  | 12.527928 | 9.886270  |

|    |           |           |           |
|----|-----------|-----------|-----------|
| C  | 6.670177  | 11.492012 | 14.721650 |
| C  | 6.190067  | 10.759757 | 11.645677 |
| Os | 11.052261 | 9.607703  | 12.623421 |
| C  | 13.186740 | 9.187744  | 12.298627 |
| C  | 12.430588 | 8.372934  | 11.381751 |
| C  | 11.567356 | 7.524155  | 12.161319 |
| C  | 11.807518 | 7.789831  | 13.552640 |
| C  | 12.817214 | 8.824523  | 13.635502 |
| C  | 11.188392 | 7.073180  | 14.708532 |
| C  | 10.645393 | 6.488676  | 11.607278 |
| C  | 12.678509 | 8.256986  | 9.912693  |
| C  | 13.409380 | 9.369865  | 14.894521 |
| C  | 14.229068 | 10.180737 | 11.905344 |
| H  | 8.263545  | 14.663371 | 15.079593 |
| H  | 9.920304  | 14.154145 | 14.709198 |
| H  | 8.886116  | 13.124960 | 15.698676 |
| H  | 10.250514 | 5.651202  | 7.382142  |
| H  | 9.040774  | 4.364627  | 7.504223  |
| H  | 9.664489  | 5.141212  | 8.966363  |
| H  | 8.075001  | 5.464460  | 10.511041 |
| H  | 6.466027  | 4.943176  | 9.987352  |
| H  | 6.666995  | 6.444495  | 10.907677 |
| H  | 8.380349  | 6.495267  | 4.753802  |
| H  | 9.835536  | 7.002566  | 5.626886  |
| H  | 8.724040  | 8.216111  | 4.993944  |
| H  | 10.541716 | 14.608480 | 12.583836 |
| H  | 9.240970  | 15.434599 | 11.702472 |
| H  | 10.238889 | 14.214544 | 10.891875 |
| H  | 8.550756  | 13.449471 | 9.456500  |
| H  | 11.786053 | 6.198883  | 14.997774 |
| H  | 10.181066 | 6.729186  | 14.462201 |
| H  | 11.105996 | 7.727999  | 15.579440 |
| H  | 11.423572 | 15.639764 | 7.904261  |
| H  | 13.073352 | 16.286353 | 7.916888  |
| H  | 12.370403 | 15.596625 | 9.389068  |
| H  | 12.426567 | 14.559465 | 4.873194  |
| H  | 11.027125 | 14.550817 | 5.957967  |
| H  | 11.418173 | 13.110658 | 5.018327  |
| H  | 9.839767  | 6.268453  | 12.311357 |
| H  | 11.184929 | 5.554665  | 11.402063 |
| H  | 10.183204 | 6.839601  | 10.681015 |
| H  | 5.769625  | 12.078719 | 14.946164 |
| H  | 6.361873  | 10.462699 | 14.523053 |
| H  | 7.296122  | 11.480900 | 15.617441 |
| H  | 14.990052 | 10.174571 | 7.874982  |
| H  | 16.242408 | 11.423864 | 7.786815  |
| H  | 15.425787 | 11.086246 | 9.318356  |
| H  | 14.370175 | 11.565260 | 4.845312  |
| H  | 13.812171 | 10.276803 | 5.924195  |
| H  | 12.639715 | 11.223178 | 5.007596  |
| H  | 6.049212  | 9.931894  | 12.344782 |
| H  | 5.217427  | 11.242452 | 11.484687 |
| H  | 6.520367  | 10.333990 | 10.694816 |
| H  | 7.212565  | 12.271046 | 9.383634  |
| H  | 14.270507 | 8.769903  | 15.216049 |
| H  | 13.745755 | 10.400085 | 14.756320 |
| H  | 12.677361 | 9.370515  | 15.705742 |

|                  |           |           |           |
|------------------|-----------|-----------|-----------|
| H                | 4.868134  | 9.073580  | 8.741022  |
| H                | 4.270659  | 7.405359  | 8.732162  |
| H                | 5.205035  | 8.017184  | 10.108135 |
| H                | 5.435212  | 8.387943  | 5.477386  |
| H                | 5.605611  | 9.694643  | 6.661708  |
| H                | 6.866086  | 9.433824  | 5.459824  |
| H                | 14.374506 | 10.929499 | 12.687243 |
| H                | 15.192048 | 9.687373  | 11.719798 |
| H                | 13.925674 | 10.706026 | 10.996434 |
| H                | 13.460015 | 7.509160  | 9.722623  |
| H                | 13.007101 | 9.203240  | 9.477014  |
| H                | 11.784072 | 7.934700  | 9.371170  |
| H                | 11.603537 | 10.675802 | 7.978569  |
| H                | 10.514676 | 12.368229 | 8.017411  |
| H                | 11.336567 | 12.869838 | 9.748877  |
| H                | 12.375495 | 11.232287 | 9.778382  |
| H                | 7.748444  | 10.033024 | 8.697904  |
| H                | 8.235157  | 8.776576  | 10.185149 |
| H                | 9.867448  | 8.278395  | 9.161340  |
| H                | 13.874953 | 14.366844 | 10.585896 |
| H                | 15.457666 | 14.375690 | 9.786795  |
| H                | 14.852372 | 12.904936 | 10.567719 |
| H                | 10.205836 | 10.428636 | 13.987916 |
| H                | 9.288713  | 9.539715  | 12.273698 |
| H                | 11.052794 | 11.372141 | 12.269405 |
| 4-Th n=3 singlet |           |           |           |
| C                | 10.588108 | 9.036032  | 6.661809  |
| C                | 9.304495  | 9.451252  | 7.082956  |
| C                | 8.746826  | 10.544883 | 6.373744  |
| C                | 9.351129  | 11.068221 | 5.230185  |
| C                | 10.565609 | 10.554809 | 4.780410  |
| C                | 11.190398 | 9.546656  | 5.514140  |
| Os               | 8.240961  | 8.379386  | 8.563722  |
| C                | 6.475831  | 7.811535  | 7.314124  |
| C                | 7.569383  | 7.031393  | 6.804495  |
| C                | 8.063502  | 6.202020  | 7.854254  |
| C                | 7.268773  | 6.441756  | 9.027111  |
| C                | 6.272287  | 7.435914  | 8.691739  |
| C                | 7.308150  | 5.639724  | 10.287877 |
| C                | 9.173553  | 5.206667  | 7.732172  |
| C                | 8.069510  | 7.047142  | 5.399257  |
| C                | 5.130194  | 7.862051  | 9.558391  |
| C                | 5.625710  | 8.737995  | 6.507748  |
| Th               | 9.994644  | 10.631468 | 9.616857  |
| Os               | 12.226153 | 12.271438 | 8.612884  |
| C                | 13.861151 | 12.618785 | 6.998912  |
| C                | 12.878594 | 13.664370 | 7.009573  |
| C                | 12.916403 | 14.295813 | 8.318998  |
| C                | 13.917124 | 13.592664 | 9.108448  |
| C                | 14.494280 | 12.567358 | 8.275341  |
| C                | 14.376762 | 13.970328 | 10.481493 |
| C                | 12.197326 | 15.547381 | 8.713440  |
| C                | 12.090666 | 14.121074 | 5.824855  |
| C                | 15.595190 | 11.632253 | 8.659409  |
| C                | 14.177417 | 11.738466 | 5.833705  |
| Os               | 9.374080  | 11.329878 | 12.382259 |



|    |           |           |           |
|----|-----------|-----------|-----------|
| C  | 7.288893  | 11.790005 | 11.878750 |
| C  | 8.123855  | 12.566393 | 10.987406 |
| C  | 8.947276  | 13.412588 | 11.822168 |
| C  | 8.590583  | 13.198086 | 13.198065 |
| C  | 7.555709  | 12.192259 | 13.232268 |
| C  | 9.123321  | 13.955582 | 14.369929 |
| C  | 9.921526  | 14.427579 | 11.323519 |
| C  | 8.229967  | 12.422147 | 9.522449  |
| C  | 6.836882  | 11.712257 | 14.450765 |
| C  | 6.254435  | 10.805800 | 11.439488 |
| Os | 11.069597 | 9.535063  | 12.430770 |
| C  | 13.194683 | 9.021340  | 12.153154 |
| C  | 12.419533 | 8.200166  | 11.261201 |
| C  | 11.513108 | 7.417421  | 12.058652 |
| C  | 11.743036 | 7.730433  | 13.440910 |
| C  | 12.789720 | 8.730643  | 13.496992 |
| C  | 11.084356 | 7.093660  | 14.621620 |
| C  | 10.537954 | 6.413557  | 11.538945 |
| C  | 12.626885 | 8.051393  | 9.788116  |
| C  | 13.375192 | 9.309295  | 14.744723 |
| C  | 14.294483 | 9.946968  | 11.746916 |
| H  | 8.499313  | 14.832703 | 14.589170 |
| H  | 10.140654 | 14.305467 | 14.179047 |
| H  | 9.150026  | 13.330143 | 15.265930 |
| H  | 9.942704  | 5.554307  | 7.037528  |
| H  | 8.798701  | 4.244626  | 7.362321  |
| H  | 9.654226  | 5.032958  | 8.697928  |
| H  | 8.307091  | 5.241336  | 10.476254 |
| H  | 6.614678  | 4.792294  | 10.221730 |
| H  | 7.025766  | 6.242364  | 11.154033 |
| H  | 7.500961  | 6.333748  | 4.789563  |
| H  | 9.123533  | 6.768215  | 5.348458  |
| H  | 7.970166  | 8.037093  | 4.950400  |
| H  | 10.791659 | 14.498898 | 11.982075 |
| H  | 9.450406  | 15.418142 | 11.267463 |
| H  | 10.287000 | 14.163360 | 10.329557 |
| H  | 8.593122  | 13.332690 | 9.042707  |
| H  | 11.015404 | 10.930099 | 3.864762  |
| H  | 8.866271  | 11.875588 | 4.687292  |
| H  | 7.781868  | 10.937963 | 6.682720  |
| H  | 11.663321 | 6.233433  | 14.983736 |
| H  | 10.079731 | 6.743609  | 14.370656 |
| H  | 10.985331 | 7.804242  | 15.446083 |
| H  | 11.193657 | 15.574576 | 8.281885  |
| H  | 12.737278 | 16.442343 | 8.377213  |
| H  | 12.089161 | 15.606811 | 9.798474  |
| H  | 12.690541 | 14.776910 | 5.181196  |
| H  | 11.202734 | 14.676849 | 6.137079  |
| H  | 11.751865 | 13.270316 | 5.230834  |
| H  | 9.705691  | 6.286593  | 12.234009 |
| H  | 11.015531 | 5.434952  | 11.392413 |
| H  | 10.114067 | 6.743773  | 10.586944 |
| H  | 12.151884 | 9.154946  | 5.191444  |
| H  | 5.988064  | 12.367022 | 14.689968 |
| H  | 6.451855  | 10.700105 | 14.306237 |
| H  | 7.501158  | 11.693367 | 15.318462 |
| H  | 15.444022 | 10.639693 | 8.226713  |

|   |           |           |           |
|---|-----------|-----------|-----------|
| H | 16.562093 | 12.009041 | 8.303944  |
| H | 15.659924 | 11.516277 | 9.743073  |
| H | 14.978127 | 12.176418 | 5.224331  |
| H | 14.507495 | 10.750852 | 6.165502  |
| H | 13.300559 | 11.601235 | 5.200536  |
| H | 6.101855  | 10.027973 | 12.191896 |
| H | 5.294188  | 11.308939 | 11.265791 |
| H | 6.555536  | 10.308859 | 10.514198 |
| H | 7.281217  | 12.127131 | 9.069547  |
| H | 14.184001 | 8.677071  | 15.134309 |
| H | 13.783203 | 10.306705 | 14.560962 |
| H | 12.616945 | 9.406697  | 15.525657 |
| H | 4.856107  | 8.902637  | 9.367042  |
| H | 4.245121  | 7.239151  | 9.377329  |
| H | 5.391719  | 7.783746  | 10.615730 |
| H | 4.854840  | 8.186212  | 5.955592  |
| H | 5.124604  | 9.467234  | 7.149092  |
| H | 6.229924  | 9.292031  | 5.784890  |
| H | 14.475380 | 10.697191 | 12.519462 |
| H | 15.228552 | 9.393012  | 11.583169 |
| H | 14.036551 | 10.476402 | 10.825857 |
| H | 11.083768 | 8.234812  | 7.203533  |
| H | 13.400237 | 7.299315  | 9.581296  |
| H | 12.956616 | 8.983441  | 9.320845  |
| H | 11.712498 | 7.716218  | 9.290912  |
| H | 11.724288 | 10.930319 | 7.805181  |
| H | 10.678510 | 12.564394 | 8.188662  |
| H | 11.506988 | 12.662499 | 10.014694 |
| H | 12.448528 | 11.037465 | 9.673259  |
| H | 7.651785  | 9.892458  | 8.783106  |
| H | 8.265013  | 8.676152  | 10.164026 |
| H | 9.780115  | 8.140553  | 9.067774  |
| H | 13.557719 | 14.405961 | 11.057722 |
| H | 15.193755 | 14.701457 | 10.440791 |
| H | 14.728290 | 13.096926 | 11.034675 |
| H | 10.208651 | 10.463356 | 13.742905 |
| H | 9.313164  | 9.520604  | 12.057883 |
| H | 11.174016 | 11.304456 | 12.074418 |

## References

- 1 P. J. Bailey, R. A. Coxall, C. M. Dick, S. Fabre, L. C. Henderson, C. Herber, S. T. Liddle, D. Loroño-González, A. Parkin and S. Parsons, *Chemistry – A European Journal*, 2003, **9**, 4820–4828.
- 2 C. L. Gross and G. S. Girolami, *Organometallics*, 2007, **26**, 160–166.
- 3 T. Shima and H. Suzuki, *Organometallics*, 2005, **24**, 3939–3945.
- 4 J. L. Kiplinger, D. E. Morris, B. L. Scott and C. J. Burns, *Organometallics*, 2002, **21**, 5978–5982.
- 5 T. Cantat, B. L. Scott and J. L. Kiplinger, *Chem. Commun.*, 2010, **46**, 919–921.
- 6 APEX2, APEX3, SADABS, TWINABS and SAINT. Bruker AXS. Madison, WI, USA.
- 7 G. M. Sheldrick, *Acta Crystallogr A Found Adv*, 2015, **71**, 3–8.
- 8 G. M. Sheldrick, *Acta Crystallogr C Struct Chem*, 2015, **71**, 3–8.
- 9 O. V. Dolomanov, L. J. Bourhis, R. J. Gildea, J. A. K. Howard and H. Puschmann, *J Appl Crystallogr*, 2009, **42**, 339–341.
- 10 C. F. Macrae, I. J. Bruno, J. A. Chisholm, P. R. Edgington, P. McCabe, E. Pidcock, L. Rodriguez-Monge, R. Taylor, J. van de Streek and P. A. Wood, *Journal of Applied Crystallography*, 2008, **41**, 466–470.
- 11 M. J. Frisch, G. W. Trucks, H. B. Schlegel, G. E. Scuseria, M. A. Robb, J. R. Cheeseman, G. Scalmani, V. Barone, G. A. Petersson, H. Nakatsuji, X. Li, M. Caricato, A. Marenich, J. Bloino, B. G. Janesko, R. Gomperts, B. Mennucci, H. P. Hratchian, J. V. Ortiz, A. F. Izmaylov, J. L. Sonnenberg, D. Williams-Young, F. Ding, F. Lipparini, F. Egidi, J. Goings, B. Peng, A. Petrone, T. Henderson, D. Ranasinghe, V. G. Zakrzewski, J. Gao, N. Rega, G. Zheng, W. Liang, M. Hada, M. Ehara, K. Toyota, R. Fukuda, J. Hasegawa, M. Ishida, T. Nakajima, Y. Honda, O. Kitao, H. Nakai, T. Vreven, K. Throssell, J. A. Montgomery, Jr., J. E. Peralta, F. Ogliaro, M. Bearpark, J. J. Heyd, E. Brothers, K. N. Kudin, V. N. Staroverov, T. Keith, R. Kobayashi, J. Normand, K. Raghavachari, A. Rendell, J. C. Burant, S. S. Iyengar, J. Tomasi, M. Cossi, J. M. Millam, M. Klene, C. Adamo, R. Cammi, J. W. Ochterski, R. L. Martin, K. Morokuma, O. Farkas, J. B. Foresman and D. J. Fox, Gaussian 09.
- 12 J. P. Perdew, J. A. Chevary, S. H. Vosko, K. A. Jackson, M. R. Pederson, D. J. Singh and C. Fiolhais, *Phys. Rev. B*, 1992, **46**, 6671–6687.
- 13 A. D. Becke, *J. Chem. Phys.*, 1993, **98**, 5648–5652.
- 14 X. Cao and M. Dolg, *Journal of Molecular Structure: THEOCHEM*, 2004, **673**, 203–209.
- 15 X. Cao, M. Dolg and H. Stoll, *J. Chem. Phys.*, 2003, **118**, 487–496.
- 16 D. Andrae, U. Häußermann, M. Dolg, H. Stoll and H. Preuß, *Theoret. Chim. Acta*, 1990, **77**, 123–141.
- 17 A. W. Ehlers, M. Böhme, S. Dapprich, A. Gobbi, A. Höllwarth, V. Jonas, K. F. Köhler, R. Stegmann, A. Veldkamp and G. Frenking, *Chemical Physics Letters*, 1993, **208**, 111–114.
- 18 P. C. Hariharan and J. A. Pople, *Theoret. Chim. Acta*, 1973, **28**, 213–222.
- 19 R. Ditchfield, W. J. Hehre and J. A. Pople, *J. Chem. Phys.*, 1971, **54**, 724–728.
- 20 W. J. Hehre, R. Ditchfield and J. A. Pople, *J. Chem. Phys.*, 1972, **56**, 2257–2261.
- 21 S. Grimme, S. Ehrlich and L. Goerigk, *Journal of Computational Chemistry*, 2011, **32**, 1456–1465.
- 22 A. E. Reed, L. A. Curtiss and F. Weinhold, *Chem. Rev.*, 1988, **88**, 899–926.
